# Supplementary material
Source: PubMed Central journal article supplement (PMC8491275)
Supplement: NIHMS1742393-supplement-Supporting_Information.pdf [file NIHMS1742393-supplement-Supporting_Information.pdf]

# Tuning the Kinetic Inertness of Bi<sup>3+</sup> Complexes: The Impact of Donor Atoms on Diaza-18-crown-6 Ligands as Chelators for <sup>213</sup>Bi Targeted Alpha Therapy

David J. Fiszbein,<sup>a</sup> Victoria Brown,<sup>b</sup> Nikki A. Thiele,<sup>a,†</sup> Joshua J. Woods,<sup>a,c</sup> Luke Wharton,<sup>d,e</sup> Samantha N. MacMillan,<sup>a</sup> Valery Radchenko,<sup>d,e</sup> Caterina F. Ramogida,<sup>b,d</sup> and Justin J. Wilson<sup>a\*</sup>

<sup>a</sup>Department of Chemistry and Chemical Biology, Cornell University, Ithaca, New York 14853, United States.

E-mail: [jjw275@cornell.edu](mailto:jjw275@cornell.edu)

<sup>b</sup>Department of Chemistry, Simon Fraser University, 8888 University Dr, Burnaby, BC V5A 1S6 Canada

<sup>c</sup>Robert F. Smith School for Chemical and Biomolecular Engineering, Cornell University, Ithaca, New York 14853, United States

<sup>d</sup>Life Sciences Division, TRIUMF, 4004 Wesbrook Mall, Vancouver, BC V6T 2A3 Canada

<sup>e</sup>Department of Chemistry, University of British Columbia, 2036 Main Mall, Vancouver, BC, V6T 1Z1, Canada

<sup>†</sup>Current affiliation: Chemical Sciences Division, Oak Ridge National Laboratory, Oak Ridge, Tennessee 37830, United States

## TABLE OF CONTENTS

|                                                             | <u>page</u> |
|-------------------------------------------------------------|-------------|
| <b>1. EXPERIMENTAL PROCEDURES</b> .....                     | 3           |
| <b>1.1 Ligand and Complex Syntheses</b> .....               | 4           |
| <b>1.2 X-Ray Diffraction Studies</b> .....                  | 14          |
| <b>1.3 Thermodynamic Solution Studies</b> .....             | 15          |
| <b>1.4 DTPA Challenges</b> .....                            | 16          |
| <b>1.5 Computational Details</b> .....                      | 16          |
| <b>1.6 <sup>213</sup>Bi Radiolabeling Experiments</b> ..... | 17          |
| <b>2 SUPPORTING FIGURES, TABLES, AND SCHEMES</b> .....      | 19          |
| <b>2.1 Ligand Characterization</b> .....                    | 19          |
| <b>2.2 Bi<sup>3+</sup> Complex Characterization</b> .....   | 25          |
| <b>2.3 Crystallography</b> .....                            | 60          |
| <b>2.4 DTPA Challenges</b> .....                            | 62          |
| <b>2.5. Computational Results</b> .....                     | 68          |
| <b>2.6 iTLCs</b> .....                                      | 71          |
| <b>3. REFERENCES</b> .....                                  | 76          |

## 1. EXPERIMENTAL PROCEDURES

**General.** All solvents and reagents, unless otherwise noted, were of ACS grade of higher and were purchased from commercial sources. Solvents noted as dry were obtained following storage over 3 Å molecular sieves. Deionized water ( $\geq 18 \text{ M}\Omega \cdot \text{cm}$ ) was obtained from an Elga Purelab Flex 2 water purification system and was used in all experiments. Macropa,<sup>1,2</sup> macrophosphi,<sup>3</sup> macroquin-SO<sub>3</sub>,<sup>4</sup> CHX-macropa,<sup>5</sup> macropaquin,<sup>4</sup> 2-(chloromethyl)pyridine-1-oxide (**2**),<sup>6</sup> and diethyl (6-chloromethyl)pyridin-2-yl)phosphonate (**3**)<sup>7</sup> were prepared according to published literature procedures.

High-performance liquid chromatography (HPLC) consisted of a CBM-20A communications bus module, an LC-20AP (preparative) or LC-20AT (analytical) pump, and an SPD-20AV UV/vis detector monitoring at 270 nm (Shimadzu, Japan). Analytical chromatography was carried out at a flow rate of 1.0 mL/min using an Ultra Aqueous C18 column, 100 Å, 5 µm, 250 mm × 4.6 mm (Restek, Bellefonte, PA). Semi-preparative purification was performed using an Epic Polar preparative column, 120 Å, 10 µm, 25 cm × 20 mm (ES Industries, West Berlin, NJ) at a flow rate of 14 mL/min. The solvents used in the analyses were as follows:

Solvent A: 0.1% trifluoroacetic acid (TFA) in H<sub>2</sub>O

Solvent B: 0.1% TFA in MeOH

The following linear-gradient HPLC methods were employed:

Method 1 (solvents A/B): 10% B (0–5 min), 10–100% B (5–25 min)

Method 2 (solvents A/B): 10% B (0–10 min), 10–100% B (10–40 min)

NMR spectra were recorded at 298 K, unless otherwise noted, on a Bruker AV III HD 500 MHz spectrometer equipped with a broadband Prodigy cryoprobe. Chemical shifts are reported in parts

per million (ppm).  $^1\text{H}$  NMR and  $^{13}\text{C}\{^1\text{H}\}$  NMR spectra were acquired in  $\text{D}_2\text{O}$  or  $\text{DMSO-d}_6$  and referenced to the tetramethylsilane (TMS) internal standard (0 ppm) for  $^1\text{H}$  spectra taken in  $\text{DMSO-d}_6$  and  $\text{DMSO-d}_6$  (39.52 ppm) for  $^{13}\text{C}$  spectra taken in  $\text{DMSO-d}_6$ , or an internal standard of  $\text{CH}_3\text{CN}$  (2.06 ppm,  $^1\text{H}$  NMR; 1.47 ppm,  $^{13}\text{C}$  NMR) for spectra taken in  $\text{D}_2\text{O}$ . The splitting of proton resonances in the reported  $^1\text{H}$  NMR spectra is defined as: s = singlet, d = doublet, t = triplet, q = quartet, m = multiplet, and br = broad.  $^{19}\text{F}$  NMR spectra were referenced to an internal standard of fluorobenzene (-113.15 ppm). Quantitative  $^1\text{H}$  and  $^{19}\text{F}$  NMR spectra were acquired using a 30 s relaxation delay.  $^{31}\text{P}\{^1\text{H}\}$  NMR spectra were acquired in  $\text{D}_2\text{O}$  or  $\text{DMSO-d}_6$  and referenced to internal standards of potassium phosphate monobasic (0.08 ppm) contained within capillary tubes.

High-resolution mass spectra (HRMS) were obtained on an Exactive Orbitrap mass spectrometer in positive electrospray ionization (ESI) mode (ThermoFisher Scientific, Waltham, MA). UV/visible spectra were recorded on a Cary 8454 UV-Vis (Agilent Technologies, Santa Clara, CA) using 1-cm quartz cuvettes. Elemental analysis (EA) was performed by Atlantic Microlab, Inc. (Norcross, GA).

## 1.1 Ligand and Complex Syntheses

### Synthesis of macrophospho

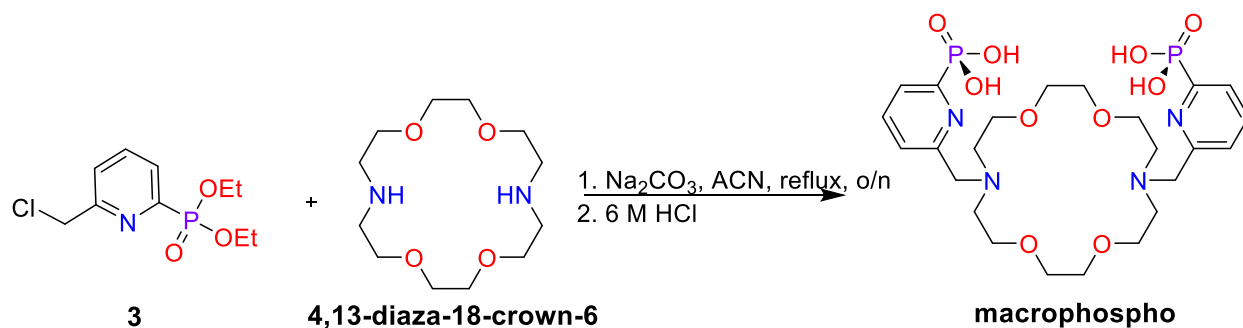

To a 100 mL round-bottom flask was added 4,13-diaza-18-crown-6 (0.824 g, 3.14 mmol) and dry acetonitrile (50 mL), giving a clear, colorless solution. To this solution was added anhydrous Na<sub>2</sub>CO<sub>3</sub> (2.001 g, 18.88 mmol) and **3** (1.65 g, 6.27 mmol), and the resulting mixture was refluxed at 90 °C for 19.5 h. After allowing to cool to RT, the solvent was evaporated under vacuum, giving a yellow oil. This oil was then dissolved in dichloromethane (DCM) (170 mL), to which H<sub>2</sub>O (10 mL) was added. The organic layer was then separated and dried over Na<sub>2</sub>SO<sub>4</sub>, and the solvent was removed under vacuum to obtain the ethyl ester, which was used in the following step without further characterization. The ethyl ester was then hydrolyzed by heating a solution of the compound at 90 °C in 6 M HCl (15 mL) for a total period of 48 h. The solvent was then removed under vacuum, and the title compound was afforded after semi-preparative reverse-phase HPLC (method 2, with impure fractions undergoing an additional purification using method 2). The solvent was removed under vacuum before the obtained TFA salt of the compound was changed to an HCl salt through three consecutive washings with 6 M HCl, with the solvent removed under vacuum between each washing. H<sub>2</sub>O was then added and the title compound was obtained after lyophilization (0.823 g, 34.0%). A residual amount of TFA was observed by NMR, but quantitative <sup>1</sup>H and <sup>19</sup>F NMR with an internal fluorobenzene standard found the average number of TFA per ligand to be insignificant (<0.1). <sup>1</sup>H NMR (500 MHz, 298 K, D<sub>2</sub>O) δ = 8.02 (m, 2H), 7.89 (t, *J* = 6.81 Hz, 2H), 7.60 (d, *J* = 7.81 Hz, 2H), 4.73 (s, 4H), 3.94 (br t, *J* = 4.66 Hz, 8H), 3.66 (m, 16 H). <sup>13</sup>C{<sup>1</sup>H} NMR (126 MHz, D<sub>2</sub>O) δ = 155.5 (d, *J* = 211.6 Hz), 149.7 (d, *J* = 19.2 Hz), 140.7 (d, *J* = 11.1 Hz), 128.0, 127.8, 127.8, 127.7, 70.4, 64.7, 57.7, 54.7. Due to overlap, while the four peaks from δ 128 – 127 belong to two <sup>13</sup>C doublets, the four peaks can not be assigned unambiguously, nor can *J* values be determined. <sup>19</sup>F NMR (470 MHz, 298 K, D<sub>2</sub>O) δ = -75.0 (TFA). <sup>31</sup>P{<sup>1</sup>H} NMR (202 MHz, 298 K, D<sub>2</sub>O) δ 6.3. Elem. anal. Found: C, 37.27; H, 5.74;

N, 7.02. Calcd for  $[\text{C}_{24}\text{H}_{38}\text{N}_4\text{O}_{10}\text{P}_2] \cdot 4.2\text{HCl} \cdot \text{H}_2\text{O}$ : C, 37.16; H, 5.74; N, 7.22. ESI-MS: Found:  $m/z$  303.11142. Calcd for  $[\text{C}_{24}\text{H}_{40}\text{N}_4\text{O}_{10}\text{P}_2]^{2+}$ :  $m/z$  303.11043. Found:  $m/z$  605.21561. Calcd for  $[\text{C}_{24}\text{H}_{39}\text{N}_4\text{O}_{10}\text{P}_2]^+$ :  $m/z$  605.21359. Found:  $m/z$  627.19747. Calcd for  $[\text{C}_{24}\text{H}_{38}\text{N}_4\text{NaO}_{10}\text{P}_2]^+$ :  $m/z$  627.19554. HPLC:  $t_R = 14.105$  (Method 1).

### Synthesis of $[\text{Bi}(\text{macropa})]^+$

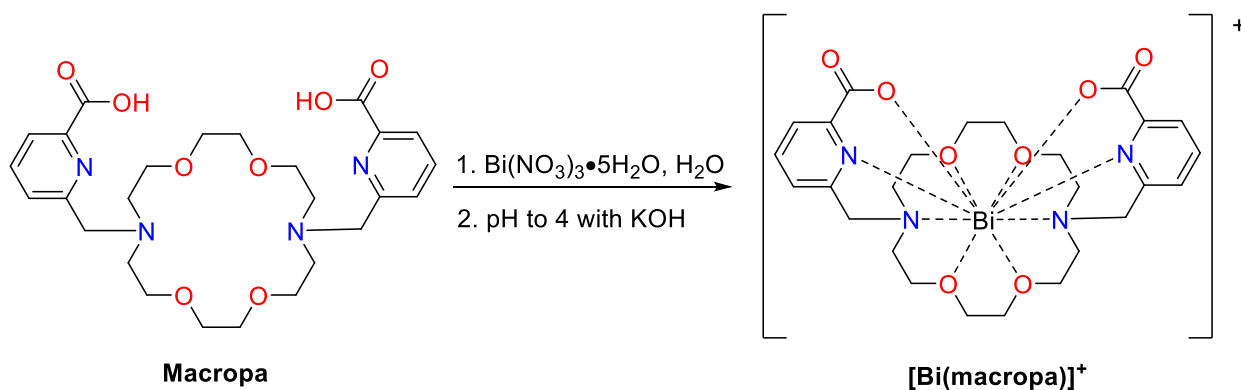

The syntheses of all  $\text{Bi}^{3+}$  complexes followed a procedure that was previously reported in the literature for related ligands.<sup>8</sup> To a solution of  $\text{H}_2\text{macropa} \cdot 2\text{HCl} \cdot 4\text{H}_2\text{O}$  (0.407 g, 0.600 mmol) in  $\text{H}_2\text{O}$  (30 mL) was added  $\text{Bi}(\text{NO}_3)_3 \cdot 5\text{H}_2\text{O}$  (0.295 g, 0.608 mmol). The mixture, which became cloudy immediately, was stirred at RT for 30 minutes, and then the pH was adjusted to 4 via aliquots of 2 M KOH. The resulting white suspension was heated at reflux at 100 °C for 19 h and then allowed to cool to RT before methanol (30 mL) was added. The white suspension was filtered through a 0.20  $\mu\text{m}$  nylon membrane, and the clear, colorless filtrate was concentrated under vacuum before an aliquot of  $\text{H}_2\text{O}$  was added and the solution lyophilized to give a white, fluffy solid. This solid was purified by preparative HPLC with method 1. Fractions containing pure material were concentrated under vacuum before an aliquot of  $\text{H}_2\text{O}$  was added for lyophilization to give the compound as a TFA salt (0.428 g, 70.0%). The average number of TFA molecules per complex was determined to be 2.3 by quantitative  $^1\text{H}$  and  $^{19}\text{F}$  spectroscopy using fluorobenzene as

an internal standard.  $^1\text{H}$  NMR (500 MHz, 298 K,  $\text{D}_2\text{O}$ )  $\delta$  = 8.47 (t,  $J$  = 7.87 Hz, 2H), 8.20 (d,  $J$  = 7.70 Hz, 2 H), 8.14 (d,  $J$  = 7.91 Hz, 2H), 4.63 (d, 16.39 Hz, 2H), 4.49 (d,  $J$  = 16.44 Hz, 2H), 3.98–3.83 (m, 4H), 3.81–3.62 (m, 4H), 3.57–3.45 (m, 4H), 3.44–3.33 (m, 2H), 3.25–3.08 (m, 4H), 2.92–2.81 (m, 2H) 2.81–2.71 (m, 2H), 2.57–2.46 (m, 2H).  $^{13}\text{C}\{^1\text{H}\}$  NMR (126 MHz, 298 K,  $\text{D}_2\text{O}$ )  $\delta$  =  $\delta$  170.9, 163.7 (TFA), 163.4 (TFA), 159.0, 148.6, 143.8, 128.5, 126.5, 118.1 (TFA), 115.8 (TFA), 69.3, 68.9, 68.1, 65.4, 61.9, 56.3, 55.6.  $^{19}\text{F}$  NMR (470 MHz, 298 K,  $\text{D}_2\text{O}$ )  $\delta$  =  $-74.9$  (TFA). Elem anal. Found: C, 36.27; H, 3.61; N, 5.51. Calcd for  $[\text{C}_{26}\text{H}_{34}\text{BiN}_4\text{O}_8][\text{C}_2\text{F}_3\text{O}_2] \cdot 1.3\text{C}_2\text{HF}_3\text{O}_2 \cdot \text{H}_2\text{O}$ : C, 36.07; H, 3.69; N, 5.50. ESI-MS: Found:  $m/z$  739.21601. Calcd for  $[\text{C}_{26}\text{H}_{34}\text{BiN}_4\text{O}_8]^+$ :  $m/z$  739.21750. HPLC:  $t_{\text{R}}$  = 19.092 min (Method 1).

### Synthesis of $[\text{Bi}(\text{macroquin-SO}_3)]^-$

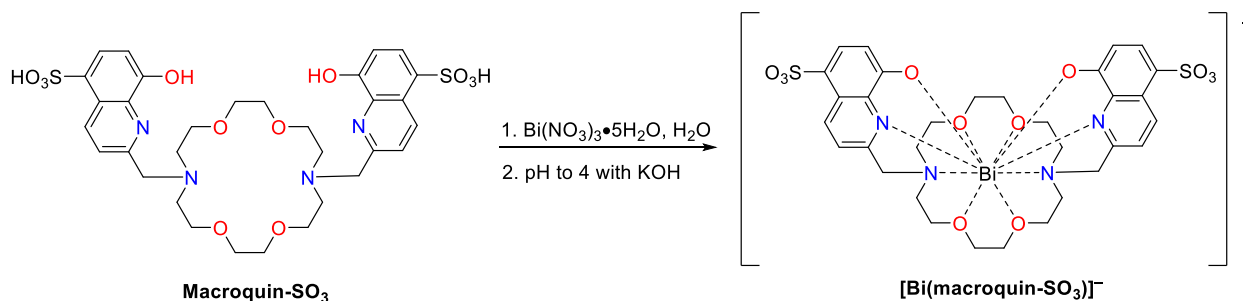

To an opaque, off-white suspension of  $\text{H}_4(\text{macroquin-SO}_3) \cdot 6\text{H}_2\text{O}$  (0.150 g, 0.178 mmol) in  $\text{H}_2\text{O}$  (4 mL) was added  $\text{Bi}(\text{NO}_3)_3 \cdot 5\text{H}_2\text{O}$  (0.120 g, 0.247 mmol). The mixture, which became an intensely yellow immediately, was stirred at RT for 30 minutes, and then, the pH was adjusted to 4 with aliquots of 2 M KOH. The resulting opaque, yellow suspension was heated at reflux at  $100^\circ\text{C}$  for 21 h. The suspension was then allowed to cool to RT before being transferred to a centrifuge tube and centrifuged at 3000 rpm for 5 minutes. The resulting clear, yellow supernatant was then purified through preparative HPLC (Method 1) to give the title compound following concentration under vacuum of fractions containing pure material and subsequent addition of  $\text{H}_2\text{O}$

for lyophilization (0.141 g, 75.1%). The average number of TFA molecules per complex was determined to be  $< 0.1$  by quantitative  $^1\text{H}$  and  $^{19}\text{F}$  NMR spectroscopy using fluorene as an internal standard.  $^1\text{H}$  NMR (500 MHz, 298 K,  $\text{D}_2\text{O}$ )  $\delta = 9.30$  (d,  $J = 8.71$  Hz, 2H), 8.23 (d,  $J = 8.23$  Hz, 2H), 8.14 (d,  $J = 8.83$  Hz, 2H), 6.86 (d,  $J = 8.29$  Hz, 2H), 4.33 (d,  $J = 16.97$  Hz), 3.76–3.63 (m, 4H), 3.63–3.54 (m, 4H), 3.40 (t,  $J = 10.51$  Hz), 3.28–3.22 (2H), 3.21–3.13 (m, 4H), 2.95 (d,  $J = 12.91$  Hz, 2H), 2.83–2.76 (m, 2H), 2.57–2.50 (m, 2H), 2.01–1.95 (m, 2H). A peak overlaps with the solvent peak, which is most likely the remaining 2H from the methylene arm linker.  $^{13}\text{C}\{^1\text{H}\}$  NMR (126 MHz, 298 K,  $\text{D}_2\text{O}$ )  $\delta$  160.6, 160.0, 143.4, 139.8, 130.8, 126.9, 126.6, 122.9, 115.8, 68.8, 68.5, 68.0, 65.9, 61.9, 56.7, 55.0.  $^{19}\text{F}$  NMR (470 MHz, 298 K,  $\text{D}_2\text{O}$ )  $\delta = -74.9$  (TFA). Elem anal. Found: C, 36.59; H, 4.69; N, 5.11. Calcd for  $[\text{C}_{32}\text{H}_{37}\text{BiN}_4\text{O}_{12}\text{S}_2] \cdot 6\text{H}_2\text{O}$ : C, 36.51; H, 4.88; N, 5.32. ESI: Found  $m/z$ : 943.16595. Calcd for  $[\text{C}_{32}\text{H}_{38}\text{BiN}_4\text{O}_{12}\text{S}_2]^+$ : 943.17260. Found  $m/z$ : 965.14764. Calcd for  $[\text{C}_{32}\text{H}_{37}\text{BiN}_4\text{NaO}_{12}\text{S}_2]^+$ :  $m/z$  965.15454. Found  $m/z$ : 987.12954. Calcd for  $[\text{C}_{32}\text{H}_{36}\text{BiN}_4\text{Na}_2\text{O}_{12}\text{S}_2]^+$ : 987.13649. HPLC:  $t_{\text{R}} = 15.663$  minutes (Method 1).

### Synthesis of $[\text{Bi}(\text{macrophospho})]^+$

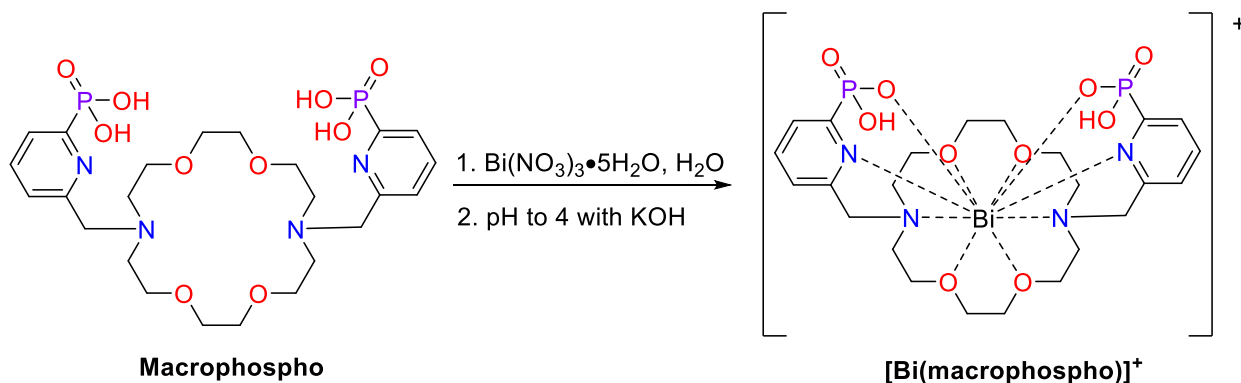

To a clear, colorless aqueous stock solution of macrophospho (18.0 mL of 22.5 mM ligand, 0.404 mmol) was added  $\text{Bi}(\text{NO}_3)_3 \cdot 5\text{H}_2\text{O}$  (0.259 g, 0.534 mmol). The mixture, which became a white, cloudy suspension immediately, was stirred at RT for 30 minutes, and then the pH was adjusted to



4 using aliquots of 2 M KOH. The resulting white suspension was then heated at reflux at 100 °C for 21 h before being allowed to cool to RT followed by an addition of methanol (5 mL) and subsequent filtration through a 0.22 µm nylon membrane. The clear, colorless filtrate was then concentrated down over vacuum before being purified to give the title compound through preparative HPLC with method 1. Fractions containing pure material were concentrated under vacuum before an aliquot of H<sub>2</sub>O was added for lyophilization to give the compound as a TFA salt (0.321 g, 70.2% yield). The average number of TFA molecules per complex was determined to be 2.5 by quantitative <sup>1</sup>H and <sup>19</sup>F NMR spectroscopy using fluorene as an internal standard. <sup>1</sup>H NMR (500 MHz, 298 K, D<sub>2</sub>O) δ = 8.37 (br s, 2H), 8.06 – 7.92 (m, 4H), 4.54 (br d, *J* = 15.42 Hz, 2H), 4.41 (br d, *J* = 15.51 Hz, 2H), 4.03 (br s, 2H), 3.84 (br s, 2H), 3.72 (br s, 4H), 3.58 – 3.34 (m, 6H), 3.24 – 3.14 (m, 2H), 3.09 (br s, 2H), 2.91 (br s, 2H), 2.55 (br s, 2H). <sup>13</sup>C{<sup>1</sup>H} (126 MHz, 298 K, D<sub>2</sub>O) δ = 163.5 (q, *J* = 36.1 Hz, TFA), 159.3 (d, *J* = 21.1 Hz), 155.8, 154.2, 142.3, 128.3 (d, *J* = 18.4 Hz), 127.3, 119.7 (CH<sub>3</sub>CN), 116.9 (q, *J* = 294.60 Hz, TFA), 68.9, 68.6, 67.6, 65.3, 62.7, 56.5, 55.3. <sup>19</sup>F NMR (470 MHz, 298 K, D<sub>2</sub>O) δ = -74.9 (TFA). <sup>31</sup>P{<sup>1</sup>H} NMR (202 MHz, 298 K, D<sub>2</sub>O) δ = 13.46. Elem anal. Found: C, 30.93; H, 3.65; N, 4.83. Calcd for [C<sub>24</sub>H<sub>36</sub>BiN<sub>4</sub>O<sub>10</sub>P<sub>2</sub>][C<sub>2</sub>F<sub>3</sub>O<sub>2</sub>]·1.5C<sub>2</sub>HF<sub>3</sub>O<sub>2</sub>·2H<sub>2</sub>O: C, 30.78; H, 3.70; N, 4.95. ESI-MS: Found *m/z* 406.08818. Calcd for [C<sub>24</sub>H<sub>37</sub>BiN<sub>4</sub>O<sub>10</sub>P<sub>2</sub>]<sup>2+</sup>: *m/z* 406.08889. Found *m/z* 811.16912. Calcd for [C<sub>24</sub>H<sub>36</sub>BiN<sub>4</sub>O<sub>10</sub>P<sub>2</sub>]<sup>+</sup>: *m/z* 811.17050. Found *m/z*: 833.15062. Calcd for [C<sub>24</sub>H<sub>35</sub>O<sub>10</sub>N<sub>4</sub>BiNaP<sub>2</sub>]<sup>+</sup>: *m/z* 833.15245. HPLC: *t<sub>R</sub>* = 18.041 min (Method 1).

### Synthesis of [Bi(macrophosphi)]<sup>+</sup>



125.2, 67.7, 67.0, 66.5, 64.9, 61.0, 56.1, 53.8, 20.4 (d,  $J = 99.2$  Hz).  $^{19}\text{F}$  NMR (470 MHz, 298 K,  $\text{D}_2\text{O}$ )  $\delta = -74.5$  (TFA).  $^{31}\text{P}\{^1\text{H}\}$  NMR: (202 MHz, 393.2 K,  $\text{DMSO-d}_6$ )  $\delta = 26.4$ . Elem anal. Found: C, 33.58; H, 4.17; N, 5.17. Calcd for  $[\text{C}_{26}\text{H}_{40}\text{BiN}_4\text{O}_8\text{P}_2][\text{C}_2\text{F}_3\text{O}_2] \cdot 1.5\text{C}_2\text{HF}_3\text{O}_2 \cdot \text{H}_2\text{O}$ : C, 33.56; H, 3.95; N, 5.05. ESI-MS: Found:  $m/z$  404.10820. Calcd for  $[\text{C}_{26}\text{H}_{41}\text{BiN}_4\text{O}_8\text{P}_2]^{2+}$ :  $m/z$  404.10962. Found:  $m/z$  807.20897. Calc for  $[\text{C}_{26}\text{H}_{40}\text{BiN}_4\text{O}_8\text{P}_2]^+$ :  $m/z$  807.21197. HPLC:  $t_{\text{R}} = 21.253$  min (Method 1).

### Synthesis of $[\text{Bi}(\text{CHX-macropa})]^+$

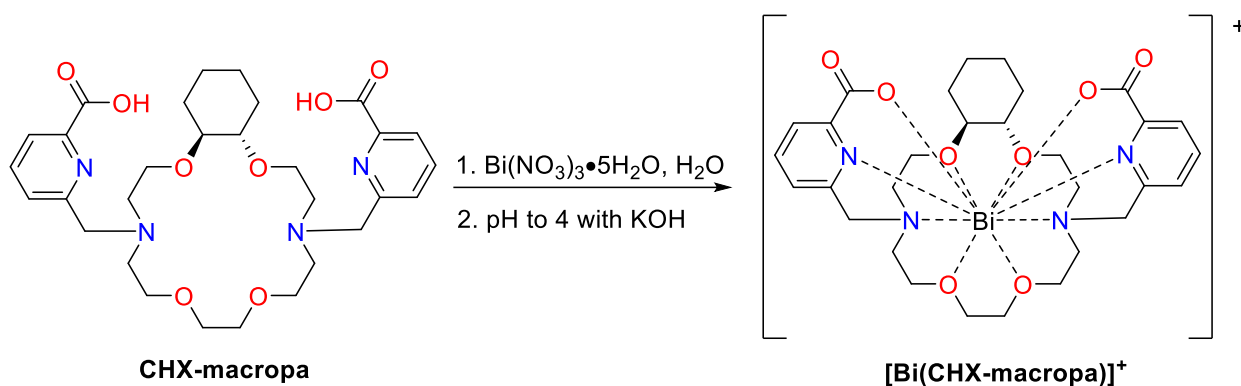

To a solution of  $\text{H}_2\text{CHX-macropa} \cdot 3.4\text{HCl} \cdot 1.4\text{H}_2\text{O}$  (0.0684 g, 0.0930 mmol) in  $\text{H}_2\text{O}$  (4 mL) was added  $\text{Bi}(\text{NO}_3)_3 \cdot 5\text{H}_2\text{O}$  (0.0589 g, 0.121 mmol). The mixture, which became cloudy immediately, was stirred at RT for 30 minutes, after which the pH was adjusted to 4 with aliquots of 2 M KOH. The resulting white, cloudy suspension was heated at reflux at  $100^\circ\text{C}$  for 19 h before being allowed to cool to RT followed by an addition of methanol (4 mL). The suspension was then filtered through a  $0.22\ \mu\text{m}$  nylon membrane, giving a clear, colorless filtrate that was then concentrated down under vacuum to a white residue before being purified through preparative HPLC with method 1. Fractions containing pure material were concentration under vacuum, after which an aliquot of  $\text{H}_2\text{O}$  was added for subsequent lyophilization to give the title compound as a

TFA salt (0.074 g, 74.9%). The average number of TFA molecules per complex was determined to be 2.0 by quantitative  $^1\text{H}$  and  $^{19}\text{F}$  NMR spectroscopy using fluorebenzene as an internal standard.  $^1\text{H}$  NMR (500 MHz, 298 K,  $\text{D}_2\text{O}$ )  $\delta$  = 8.46 (q,  $J$  = 8.02 Hz, 2H), 8.22 (t,  $J$  = 6.93 Hz, 2H), 8.15 (t,  $J$  = 9.20 Hz, 2H), 4.61 (d,  $J$  = 15.95 Hz, 2H), 4.51 (d,  $J$  = 15.95 Hz, 1H), 4.39 ( $J$  = 15.98 Hz, 1H), 4.21 – 4.10 (m, 1H), 4.05 – 3.91 (m, 2H), 3.90 – 3.80 (m, 1H), 3.77 – 3.62 (m, 3H), 3.62 – 3.54 (m, 2H), 3.53 – 3.44 (m, 1H), 3.44 – 3.31 (s, 1H), 3.31 – 3.18 (m, 2H), 3.18 – 3.04 (m, 3H), 3.04 – 2.87 (m, 3H), 2.77 – 2.67 (s, 2H), 1.94 (d,  $J$  = 10.94 Hz, 1H), 1.53 (d, 10.87 Hz, 2H), 1.37 (s, 1H), 1.08 – 0.97 (m, 1H), 0.97 – 0.84 (m, 1H), 0.75 – 0.61 (m, 1H), 0.58 – 0.45 (m, 1H).  $^{13}\text{C}\{^1\text{H}\}$  NMR (126 MHz, 298 K,  $\text{D}_2\text{O}$ )  $\delta$  170.8, 170.3, 163.6 (q,  $J$  = 34.0 Hz, TFA), 159.1, 158.7, 149.1, 148.9, 143.8, 143.6, 129.1, 128.6, 126.7, 126.5, 119.8 ( $\text{CH}_3\text{CN}$ ), 116.9 (q,  $J$  = 291.3 Hz), 80.9, 78.3, 69.5, 68.5, 67.4, 64.7, 63.4, 62.6, 61.3, 60.5, 57.2, 55.9, 55.6, 54.1, 28.8, 28.1, 23.8, 23.7.  $^{19}\text{F}$  NMR (470 MHz, 298 K,  $\text{D}_2\text{O}$ )  $\delta$  = -74.9 (TFA). Elem anal. Found: C, 38.52; H, 4.12; N, 5.25; Calcd for  $[\text{C}_{30}\text{H}_{40}\text{BiN}_4\text{O}_8][\text{C}_2\text{F}_3\text{O}_2] \cdot \text{C}_2\text{HF}_3\text{O}_2 \cdot 2\text{H}_2\text{O}$ : C, 38.65; H, 4.29; N, 5.30. ESI: Found  $m/z$ : 793.26753. Calcd for  $[\text{C}_{30}\text{H}_{40}\text{BiN}_4\text{O}_8]^+$ :  $m/z$  793.26445. HPLC:  $t_{\text{R}}$  = 22.159 min (Method 1).

### Synthesis of $[\text{Bi}(\text{macropaquin})]^+$

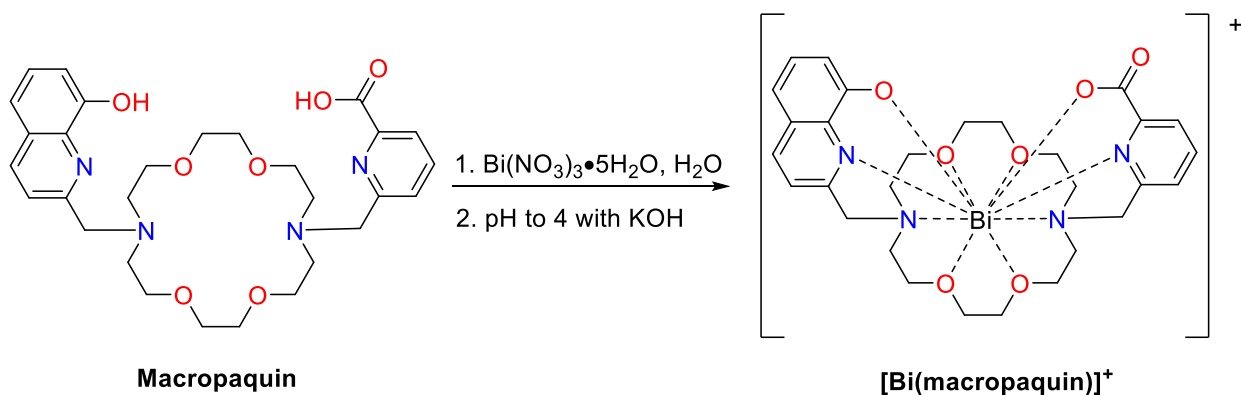

To a clear, slightly greenish solution of H<sub>2</sub>macropaquin·4HCl·4.5H<sub>2</sub>O (0.101 g, 0.130 mmol) in H<sub>2</sub>O (5 mL) was added Bi(NO<sub>3</sub>)<sub>3</sub>·5H<sub>2</sub>O (0.097 g, 0.199 mmol). The mixture, which became a cloudy green suspension immediately, was stirred for 30 minutes at RT before the pH was adjusted to 4 with aliquots of 2 M KOH. The resulting cloudy greenish-yellow suspension was heated at 90 °C for 18 h and then allowed to cool to RT. The suspension was transferred to a centrifuge tube and centrifuged at 3000 rpm for 5 minutes, giving a clear, yellow supernatant that was separated from the yellow pellets. The supernatant was then concentrated down under vacuum until most of the solvent was removed, followed by purification through preparative HPLC (method 1). Fractions containing pure material were concentrated down under vacuum, followed by addition of an aliquot of H<sub>2</sub>O for subsequent lyophilization to give the title compound as a yellow, fluffy solid (0.104 g, 80.8%). The average number of TFA molecules per complex was determined to be 1.7 by quantitative <sup>1</sup>H and <sup>19</sup>F NMR spectroscopy using fluorene as an internal standard. <sup>1</sup>H NMR (500 MHz, 298 K, D<sub>2</sub>O) δ = 8.60 (m, 1H), 8.40 (m, 1H), 8.17 (m, 1H), 8.10 (m, 1H), 7.88 (m, 1H), 7.63 (m, 1H), 7.18 (m, 1H), 6.86 (m, 1H), 4.74 – 4.67 (m, 1H), 4.65 – 4.58 (m, 1H), 4.43 – 4.32 (m, 1H), 4.28 – 4.17 (m, 1H), 3.86 – 3.63 (m, 5H), 3.61 – 3.30 (m, 8H), 3.25 – 3.14 (m, 1H), 3.14 – 2.90 (m, 4H), 2.86 – 2.65 (m, 3H), 2.45 (br s, 1H), 2.37 – 2.26 (m, 1H), 2.23 – 2.10 (m, 1H). <sup>13</sup>C{<sup>1</sup>H} NMR (126 MHz, D<sub>2</sub>O) δ = 170.7, 163.5 (q, *J* = 34.78 Hz, TFA), 160.5, 159.0, 156.3, 148.9, 143.5, 142.9, 142.2, 130.8, 130.6, 128.1, 126.1, 121.7, 119.7 (CH<sub>3</sub>CN), 118.5, 116.9 (q, *J* = 290.0 Hz, TFA), 117.1, 68.9, 68.7, 68.7, 68.1, 67.8, 65.7, 65.7, 62.1, 61.7, 56.4, 56.3, 55.3. <sup>19</sup>F NMR: –74.9 (TFA). Elem. anal. Found: C, 39.27; H, 4.05; N, 5.71. Calcd for [C<sub>29</sub>H<sub>36</sub>BiN<sub>4</sub>O<sub>7</sub>][C<sub>2</sub>F<sub>3</sub>O<sub>2</sub>]·0.7C<sub>2</sub>HF<sub>3</sub>O<sub>2</sub>·H<sub>2</sub>O: C, 39.29; H, 4.14; N, 5.66. ESI: Found *m/z*: 761.23338. Calcd for [C<sub>29</sub>H<sub>36</sub>BiN<sub>4</sub>O<sub>7</sub>]<sup>+</sup>: *m/z* 761.23823. HPLC: *t<sub>R</sub>* = 22.300 min (Method 1).

## 1.2 X-Ray Diffraction Studies

Single crystals of  $[\text{Bi}(\text{macropa})](\text{NO}_3)\cdot\text{dioxane}$  were obtained by the slow vapor diffusion of dioxane into an aqueous solution containing a 1:1 mixture of the ligand and  $\text{Bi}(\text{NO}_3)_3\cdot 5\text{H}_2\text{O}$ . Single crystals of  $[\text{Bi}(\text{macrophospho})](\text{TFA})\cdot\text{H}_2\text{O}$  were grown from the slow vapor diffusion of acetone into a DMF solution containing a TFA salt of the purified complex. Single crystals of  $[\text{Bi}(\text{macrophosphi})](\text{TFA})\cdot\text{H}_2\text{O}$  were grown from slow by the slow vapor diffusion of diethyl ether into a DMF solution containing the TFA salt of the purified complex.

Low-temperature X-ray diffraction data for the crystals were collected on a Rigaku XtaLAB Synergy diffractometer coupled to a Rigaku Hypix detector with Cu  $K\alpha$  radiation ( $\lambda = 1.54184 \text{ \AA}$ ), from a PhotonJet micro-focus X-ray source at 100 K ( $[\text{Bi}(\text{macropa})](\text{NO}_3)\cdot\text{dioxane}$  and  $[\text{Bi}(\text{macrophosphi})](\text{TFA})\cdot\text{H}_2\text{O}$ ) or 200 K ( $[\text{Bi}(\text{macrophospho})](\text{TFA})\cdot\text{H}_2\text{O}$ ). The diffraction images were processed and scaled using the CrysAlisPro software.<sup>9</sup> The structures were solved through intrinsic phasing using SHELXT<sup>10</sup> and refined against  $F^2$  on all data by full-matrix least squares with SHELXL<sup>11</sup> following established refinement strategies.<sup>12</sup> All non-hydrogen atoms were refined anisotropically. All hydrogen atoms bound to carbon were included in the model at geometrically calculated positions and refined using a riding model. Hydrogen atoms bound to oxygen were located in the difference Fourier map and subsequently refined semi-freely with the help of distance restraints. The isotropic displacement parameters of all hydrogen atoms were fixed to 1.2 times the  $U_{\text{eq}}$  value of the atoms they are linked to (1.5 times for methyl groups).  $[\text{Bi}(\text{macrophospho})](\text{TFA})\cdot\text{H}_2\text{O}$  contains disordered solvent molecules of DMF that were included in the unit cell but could not be satisfactorily modeled. Therefore, those solvents were treated as diffuse contributions to the overall scattering without specific atom positions using the solvent mask routine in Olex2.<sup>13</sup> Details of the data quality and a summary of the residual values of the refinements are listed in Table S1–S15.

### 1.3 Thermodynamic Solution Studies

Protonation constants of macrophospho were obtained by potentiometric titration using a Metrohm Titrando 888 titrator equipped with a Ross Orion combination electrode (8103BN, ThermoFisher Scientific), a Metrohm 806 exchange unit with an automatic buret (10 mL), and *Tiamo 2.5* software. Detailed descriptions of the titration setup and procedures have been reported in previous publications.<sup>4,5</sup> Briefly, all titration solutions were maintained at a constant ionic strength of 0.1 M using KCl and equilibrated for 25 min prior to the addition of titrant. Before every ligand titration, the electrode was calibrated in terms of the hydrogen-ion concentration by titrating a solution of standardized HCl (10 mM) containing supporting electrolyte (H/KCl = 0.1 M) with standardized KOH. Data within the pH ranges of 2.2–3.2 and 10.8–11.3 were analyzed using the program *Glee* (version 3.0.21)<sup>14</sup> to obtain the standard electrode potential ( $E_0$ ) and slope factor. The  $H_2O$  ion product ( $pK_w = 13.78$ ) was taken from the literature.<sup>15</sup> A stock solution of macrophospho was prepared in  $H_2O$ .

The ligand protonation constants were measured by adding standardized KOH to an aqueous solution (20 mL) of ligand (~0.02 mmol), HCl (0.1 mmol, and KCl (1.9 mmol). The titration method employed a  $0.1 \text{ mV min}^{-1}$  drift limit and a maximum wait time of 180 s between additions of aliquots of base.

The protonation constants were refined using the program *Hyperquad2013*.<sup>16</sup> The proton and ligand concentrations were admitted as a refineable parameter. The protonation constants, defined in Eq. 1 below, were calculated from the average of three independent titrations. The errors provided correspond to 1 standard deviation.

$$K_{ai} = \frac{[H_iL]}{[H_{i-1}L][H^+]} \quad (1)$$

#### 1.4 DTPA Challenges

The pH of a 100 mM 3-(*N*-morpholino)propanesulfonic acid (MOPS) buffer was adjusted to 7.4 using aqueous  $\text{NMe}_4\text{OH}$ . The ionic strength was set at 100 mM using  $\text{NMe}_4\text{Cl}$ . A stock solution of diethylenetriaminepentaacetic acid (DTPA, 125 mM) was made in this MOPS buffer by adjusting the pH of the initial suspension to 7.4 using aqueous  $\text{NMe}_4\text{OH}$ . The preformed  $\text{Bi}^{3+}$  complexes were challenged with DTPA. Challenges were initiated by adding an aliquot of complex solution to a solution containing DTPA in MOPS buffer so that the initial concentrations of macrocyclic  $\text{Bi}^{3+}$  complex were 100  $\mu\text{M}$  ( $[\text{Bi}(\text{macropa})]^+$ ,  $[\text{Bi}(\text{CHX-macropa})]^+$ ,  $[\text{Bi}(\text{macrophospho})]^+$ , and  $[\text{Bi}(\text{macrophosphi})]^+$ ) or 50  $\mu\text{M}$  ( $[\text{Bi}(\text{macroquin-SO}_3)]^-$  and  $[\text{Bi}(\text{macropaquin})]^+$ ) and the initial concentrations of DTPA were 100 mM ( $[\text{Bi}(\text{macropa})]^+$ ,  $[\text{Bi}(\text{CHX-macropa})]^+$ ,  $[\text{Bi}(\text{macrophospho})]^+$ , and  $[\text{Bi}(\text{macrophosphi})]^+$ ) or 50 mM ( $[\text{Bi}(\text{macroquin-SO}_3)]^-$  and  $[\text{Bi}(\text{macropaquin})]^+$ ). The solutions were analyzed by UV spectroscopy until no further spectral changes were observed. For  $[\text{Bi}(\text{macroquin-SO}_3)]^-$ , the solution was tracked repeatedly over the course of 21 days for any spectral changes. The final solution was then analyzed with HPLC to ensure complete transchelation had occurred for labile complexes or no transchelation had occurred for  $[\text{Bi}(\text{macroquin-SO}_3)]^-$ . The half-lives reported are the average of three replicates.

#### 1.5 Computational Details

DFT calculations were performed using the Gaussian16 software.<sup>17</sup> The geometries of the complexes were optimized in the gas phase using the crystal structure of the complexes as starting geometries when available. The optimizations were performed using the TPSSh functional<sup>18</sup> and the TZVP<sup>19</sup> basis set for all atoms except Bi, which was treated with the large-core relativistic effective core potential (ECP60MDF) and related basis set.<sup>20</sup> Frequency calculations were



performed to ensure that the optimized geometry was at a local minimum on the potential energy surface. Natural bond order analysis was performed using the NBO software as implemented in Gaussian.<sup>21</sup> Quantum theory of atoms in molecules (QTAIM) analysis was completed using the program Multiwfn (version 3.7).<sup>22</sup> The (3,-1) critical points in  $\rho(r)$  were located between the donor atoms and the Bi center and the values of  $\rho(r)$ , the energy density parameters  $V(r)$ ,  $G(r)$ , and  $H(r)$ , the ratio of potential and kinetic energies  $|V|/G$ , and the normalized total energy density  $H/\rho$  were calculated at the bond critical point. The values of  $\rho(r)$  and  $\nabla^2\rho(r)$  were also evaluated along the length of the bond path connecting the donor atoms and Bi.

## 1.6 <sup>213</sup>Bi Radiolabeling Experiments

*Caution! Work with radioactive isotopes such as <sup>213</sup>Bi should only be carried out by trained personnel at facilities equipped to safely handle and store these isotopes.*

An <sup>225</sup>Ac/<sup>213</sup>Bi generator system was used as a source of <sup>213</sup>Bi. Isolation of <sup>213</sup>Bi from <sup>225</sup>Ac was performed using an analogous approach to previously reported methods for clinically proven generator systems.<sup>23,24</sup> AGMP-50 cation exchange resin (50 mg) was packed into a 1 mL reservoir, equipped with polyethylene frits and pre-equilibrated with 4 M HNO<sub>3</sub> (2 mL). Approximately 6.5 MBq (620 mL) of first pass <sup>225/227</sup>Ac in 4 M HNO<sub>3</sub> (originating from the spallation of solid thorium targets<sup>25</sup>) was loaded onto the column. After washing the column with 4 M HNO<sub>3</sub> (2 mL), <sup>213</sup>Bi was eluted with freshly prepared 0.2 M NaI/0.1 M HCl solution (300 – 600  $\mu$ L), wherein the bulk of the activity was eluted in the first 150  $\mu$ L. Subsequent elutions (with or without 2 mL of 1 mM HCl prewash of the generator) proceeded no earlier than 3 hours after the last elution, therefore optimizing the ratio of <sup>213</sup>Bi to the amount of other radionuclide impurities such as <sup>209</sup>Pb and <sup>209</sup>Bi.<sup>23</sup> The generator was sealed between each elution to minimise evaporation from the resin. <sup>213</sup>Bi activity and radionuclidic purity was determined using a High Purity Germanium (HPGe)

detector (Mirion Technologies (Canberra) Inc.) with Genie 2000 software by measurement of gamma emission line of  $^{213}\text{Bi}$  ( $t_{1/2} = 45.6$  min, 440 keV, 25.9% abundance).

Stock solutions (1 mM) of macropa, macropaquin, macroquin-SO<sub>3</sub>, and 1,4,7,10-tetraazacyclodecane-1,4,7,10-tetraacetic acid (DOTA) were made with ultra-pure deionised water. Serial dilutions were used to prepare initial ligand solutions of 10<sup>-4</sup> M, 10<sup>-5</sup> M, 10<sup>-6</sup> M, and 10<sup>-7</sup> M with ultra-pure water. Concentration-dependent radiolabeling studies were performed by the addition of [ $^{213}\text{Bi}$ ]BiI<sub>4</sub><sup>-</sup>/[ $^{213}\text{Bi}$ ]BiI<sub>5</sub><sup>2-</sup> (30 kBq – 210 kBq) to a solution containing ligand stock (10 μL; or deionized water for negative controls) in MES buffer (80 μL; 0.5 M, pH 5.5 – 6). All radiolabeling studies were carried out within 5 minutes post-elution of the  $^{225}\text{Ac}/^{213}\text{Bi}$  generator. The reaction mixtures were gently agitated using a vortex mixer and the pH confirmed to be between 5 – 5.5 by spotting a portion (1 – 2 μL) of reaction mixture onto pH paper. Macropa, macropaquin, and macroquin-SO<sub>3</sub> were incubated at room temperature, while DOTA was incubated at 95 °C. The radiochemical yield (RCY) was analyzed after 8 minutes at room temperature/elevated temperatures by spotting an aliquot (5 – 7 μL) on the bottom of instant thin layer chromatography plates (iTLC's) or aluminum backed silica TLC plates. TLC imaging was performed using an AR-2000 imaging scanner equipped with PD-10 gas, and analysis of radiochemical conversion yields (RCYs) was carried out using WinScan V3\_14 software. TLC/iTLC plate systems were optimized for each ligand. For macropa and DOTA, the system consisted of paper backed iTLC-silicic acid (iTLC-SA, Agilent Technologies), with ethylenediaminetetraacetic acid (EDTA) (50 mM, pH 5.5) as the mobile phase. For macropaquin, the system consisted of aluminum backed silica TLC plates (TLC-SG, MERCK), with citrate buffer (0.4 M, pH 4.0) as the mobile phase. For macroquin-SO<sub>3</sub>, the system consisted of aluminum backed silica TLC plates (TLC-SG, MERCK), with EDTA (50 mM, pH 5.5) as the mobile phase.

For all these systems, free  $^{213}\text{Bi}$  migrates with the solvent front ( $R_f = 1$ ) while  $^{213}\text{Bi}$  complexes will remain at the baseline ( $R_f = 0$ ). The resulting iTLC data are present in detailed below.

## 2 SUPPORTING FIGURES, TABLES, AND SCHEMES

### 2.1 Ligand Characterization

#### 2.1.1 Macrophospho

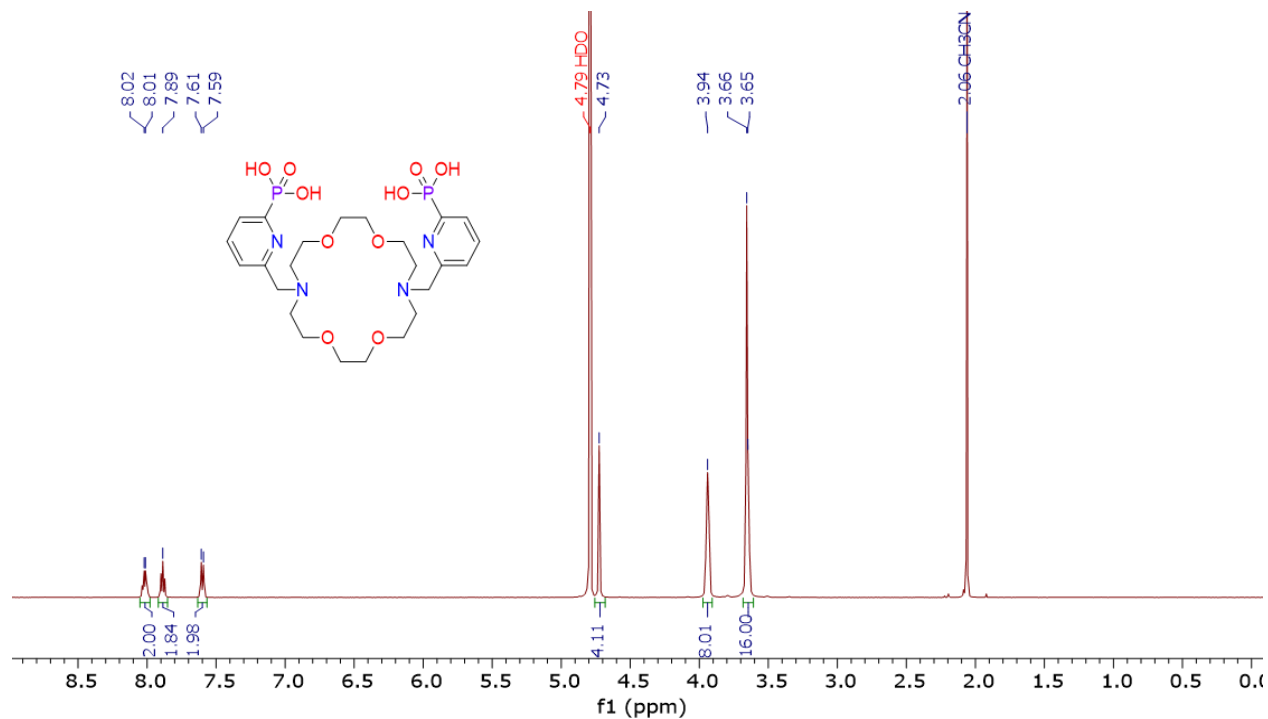

Figure S1.  $^1\text{H}$  NMR spectrum of macrophospho. 500 MHz, 298 K,  $\text{D}_2\text{O}$ .



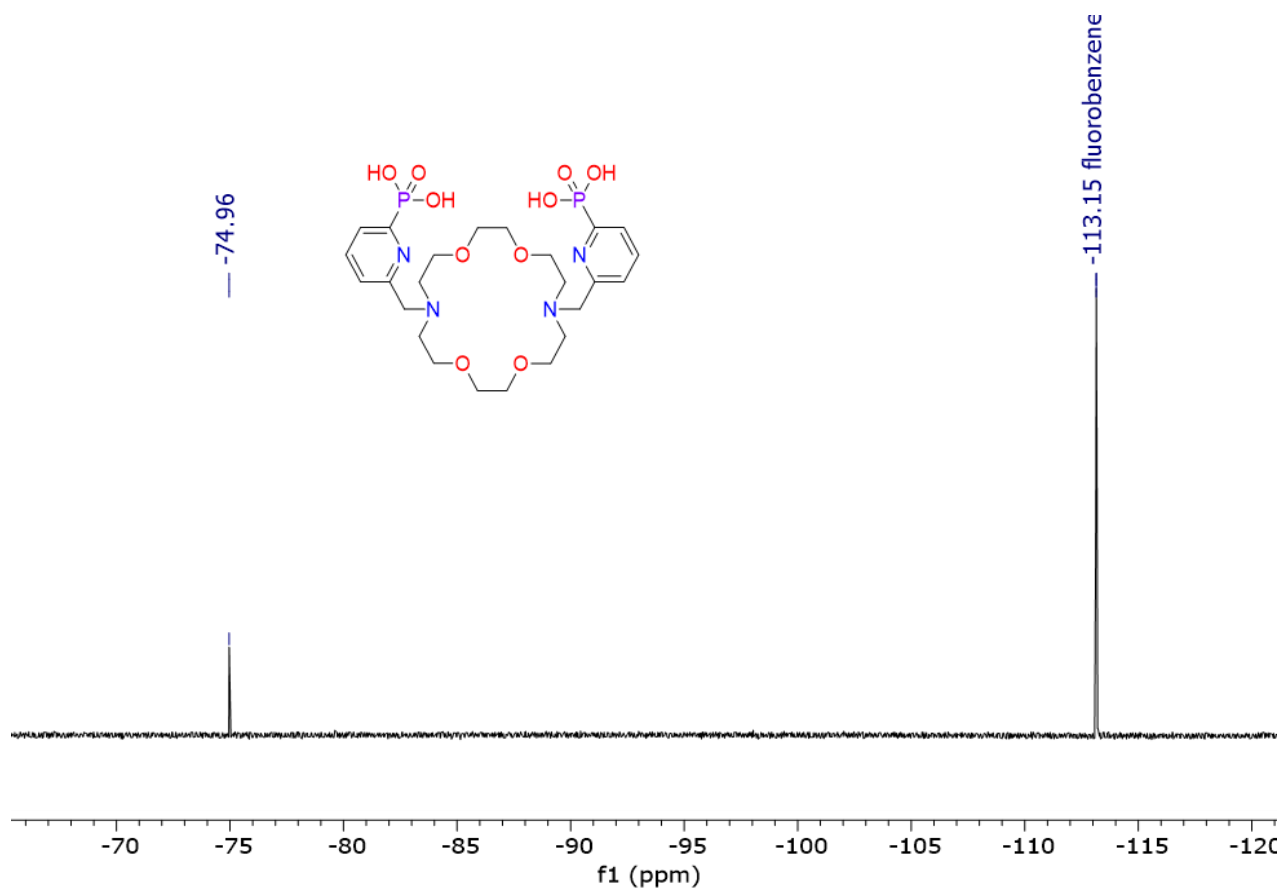

Figure S3.  $^{19}\text{F}$  NMR spectrum of macrophospho. 470 MHz, 298 K,  $\text{D}_2\text{O}$ .

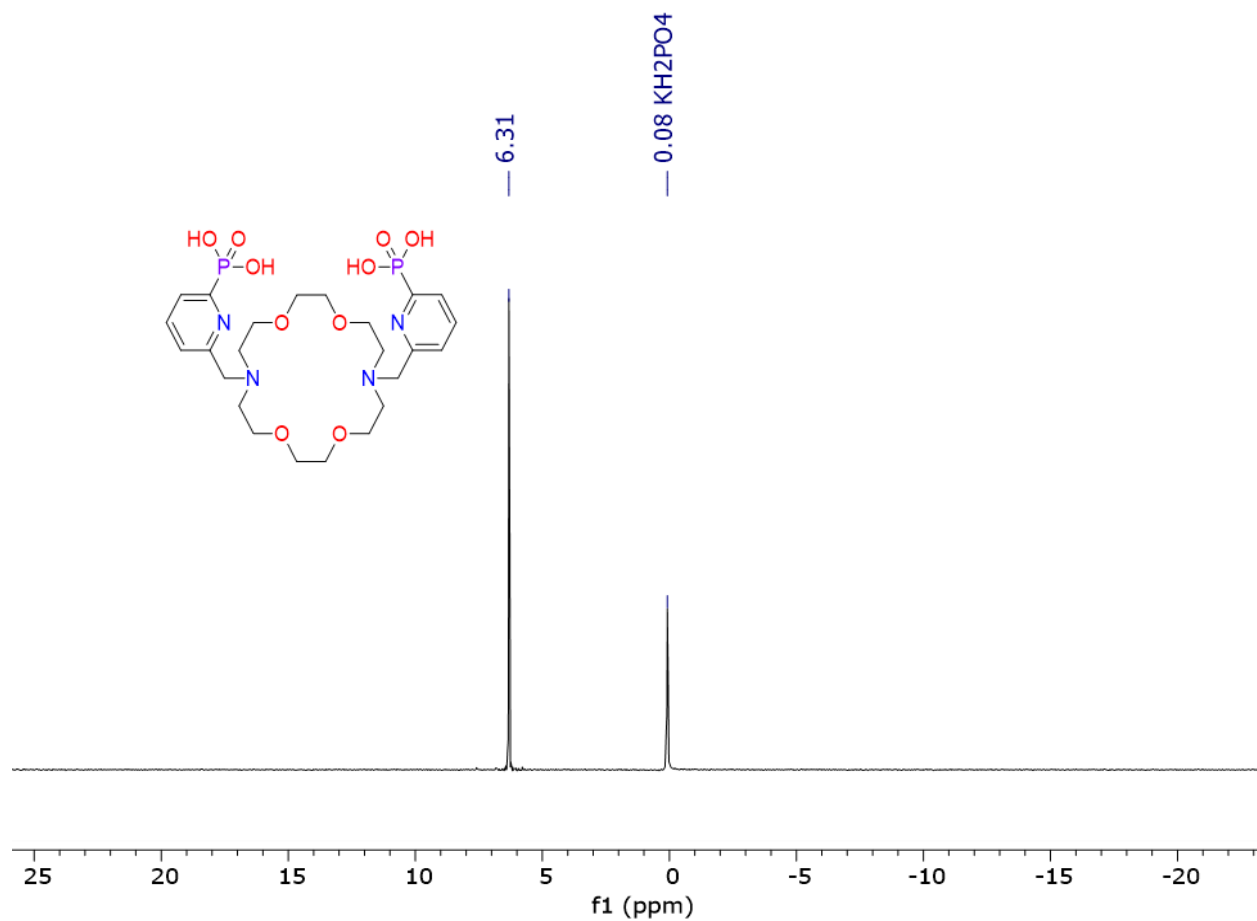

**Figure S4.**  $^{31}\text{P}\{^1\text{H}\}$  NMR spectrum of macrophospho. 202 MHz, 298 K,  $\text{D}_2\text{O}$ .

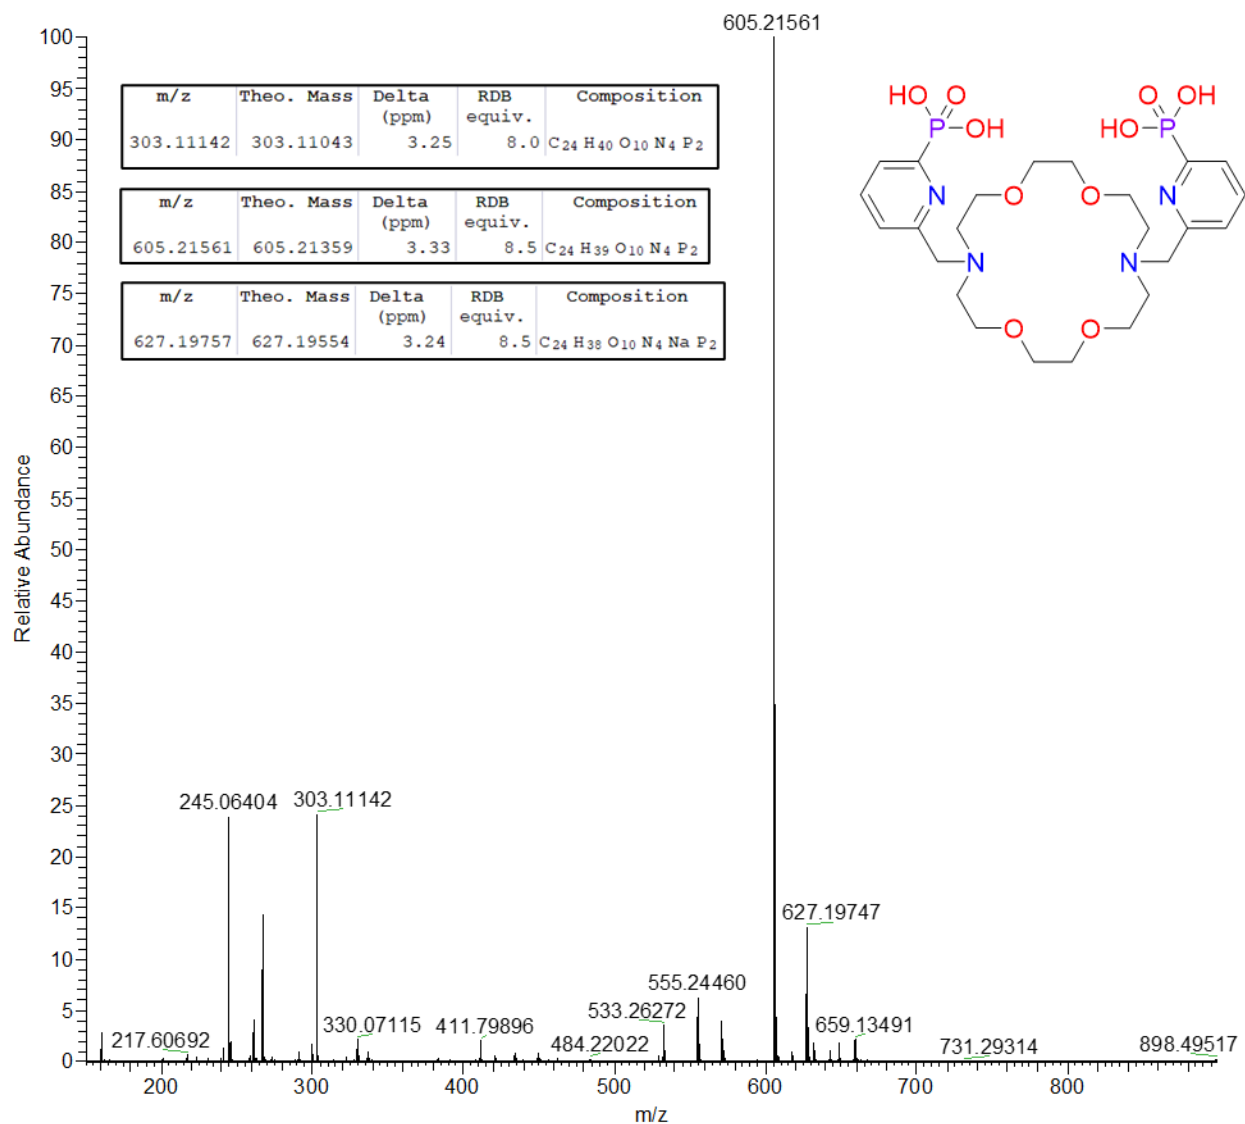

**Figure S5. ESI-HRMS of macrophospho.** The sample was diluted using a solution of CH<sub>3</sub>CN:H<sub>2</sub>O (7:3) containing 1% formic acid. The sample was analyzed using a mobile phase of CH<sub>3</sub>CN:H<sub>2</sub>O (7:3). Three ion peaks were observed, corresponding to [M+2H]<sup>2+</sup> (*m/z* 303.11142), [M+H]<sup>+</sup> (*m/z* 605.21561), and [M+Na]<sup>+</sup> (*m/z* 627.19747).

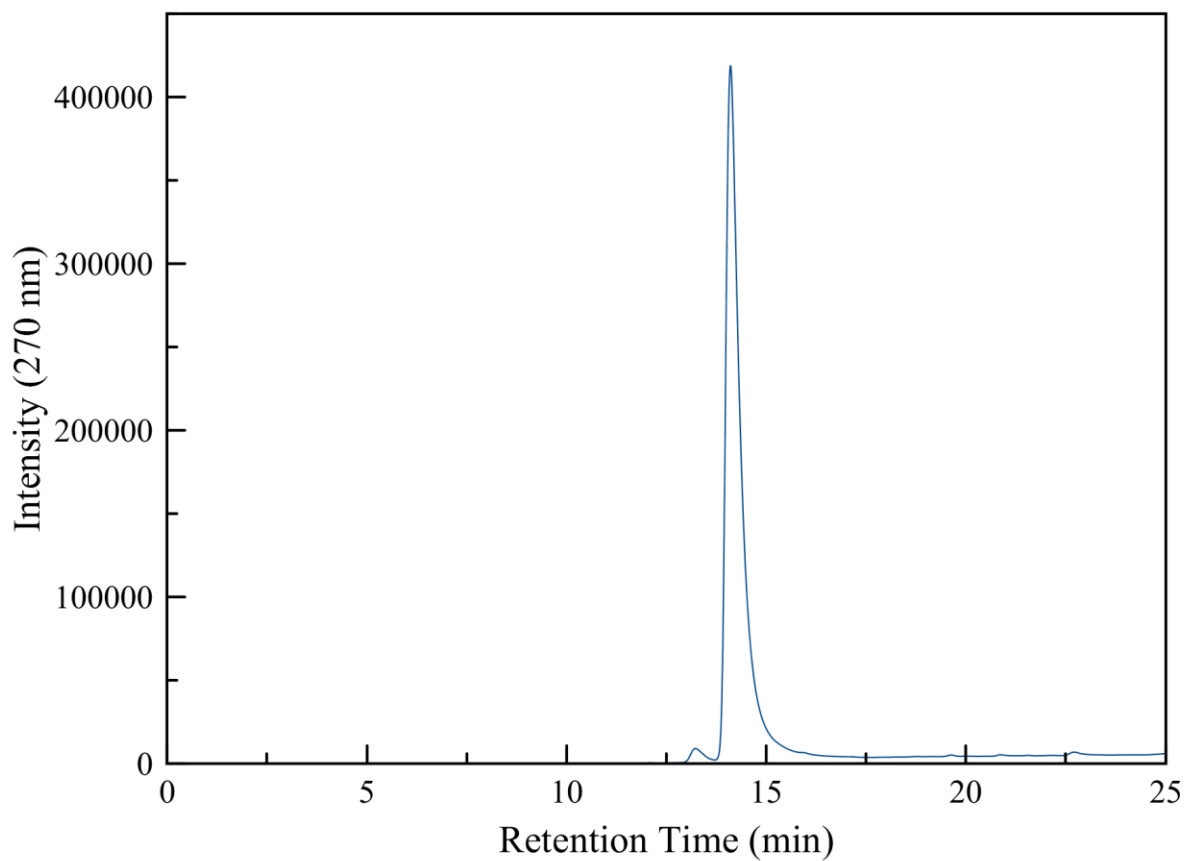

**Figure S6. HPLC chromatogram of macrophospho.** Retention time ( $t_R$ ) = 14.105 min using a binary MeOH/H<sub>2</sub>O mobile phase containing 0.1% TFA (program: 10% MeOH for 5 min, followed by a linear gradient to 100% MeOH over 20 min).



## 2.2 Bi<sup>3+</sup> Complex Characterization

### 2.2.1 Bi(macropa)]<sup>+</sup>

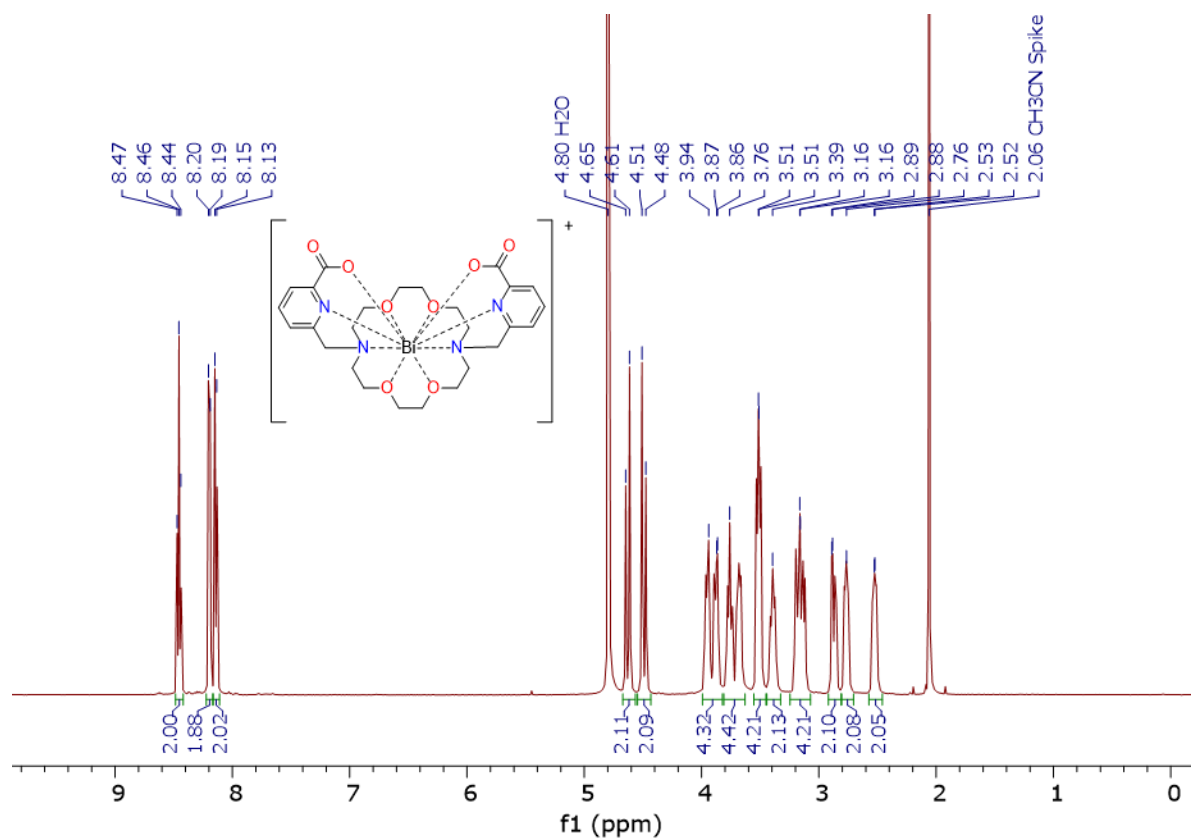

Figure S7. <sup>1</sup>H NMR spectrum of [Bi(macropa)]<sup>+</sup>. 500 MHz, 298 K, D<sub>2</sub>O.

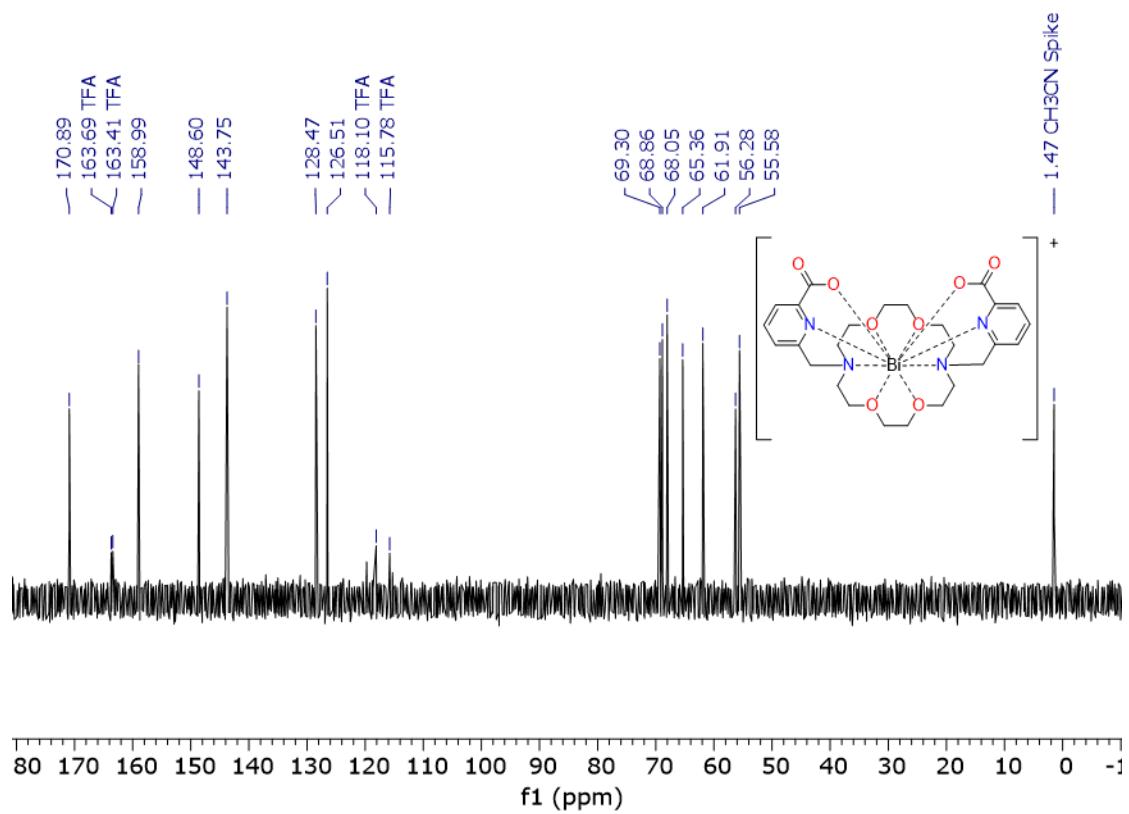

**Figure S8.**  $^{13}\text{C}\{^1\text{H}\}$  NMR spectrum of  $[\text{Bi}(\text{macropa})]^+$ . 126 MHz, 298 K,  $\text{D}_2\text{O}$ .

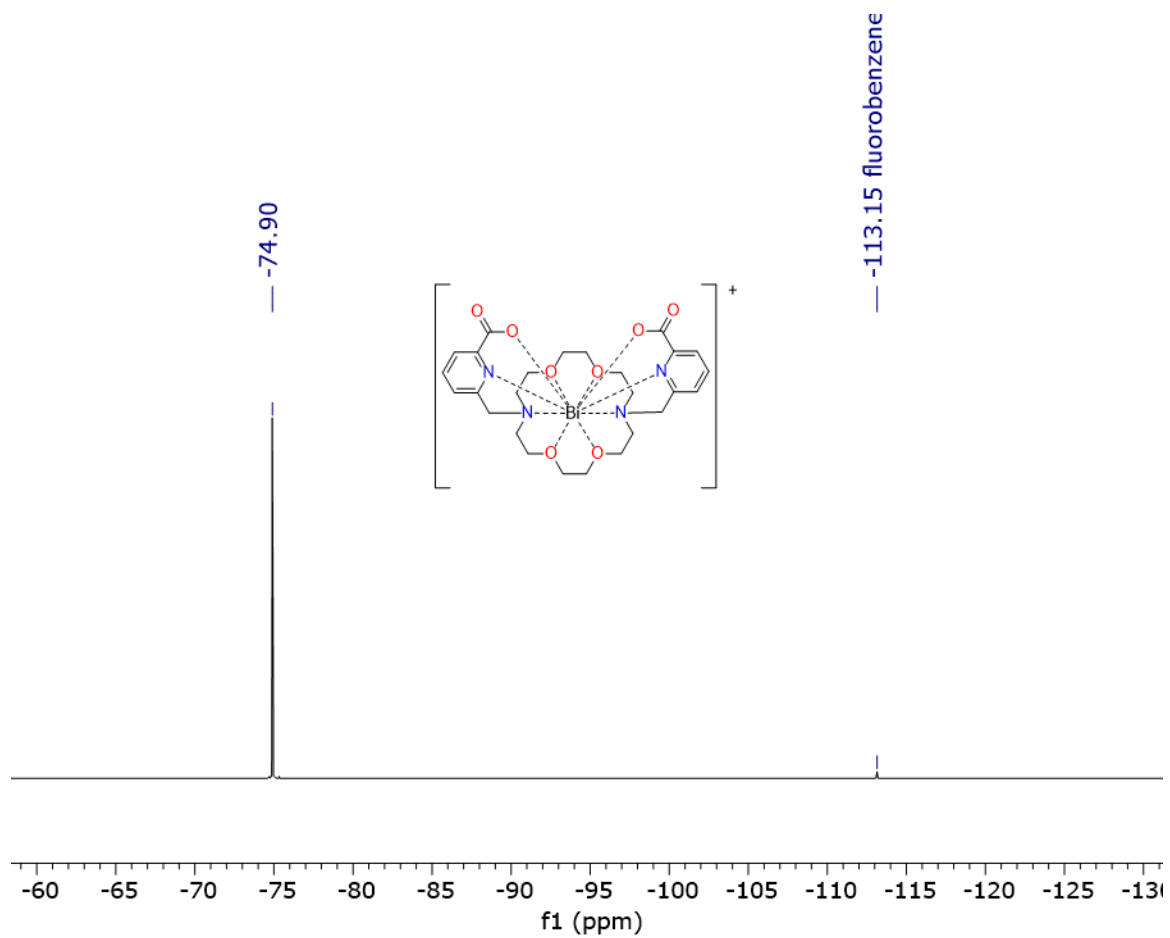

**Figure S9.**  $^{19}\text{F}$  NMR spectrum of  $[\text{Bi}(\text{macropa})]^+$ . 470 MHz, 298 K,  $\text{D}_2\text{O}$ .

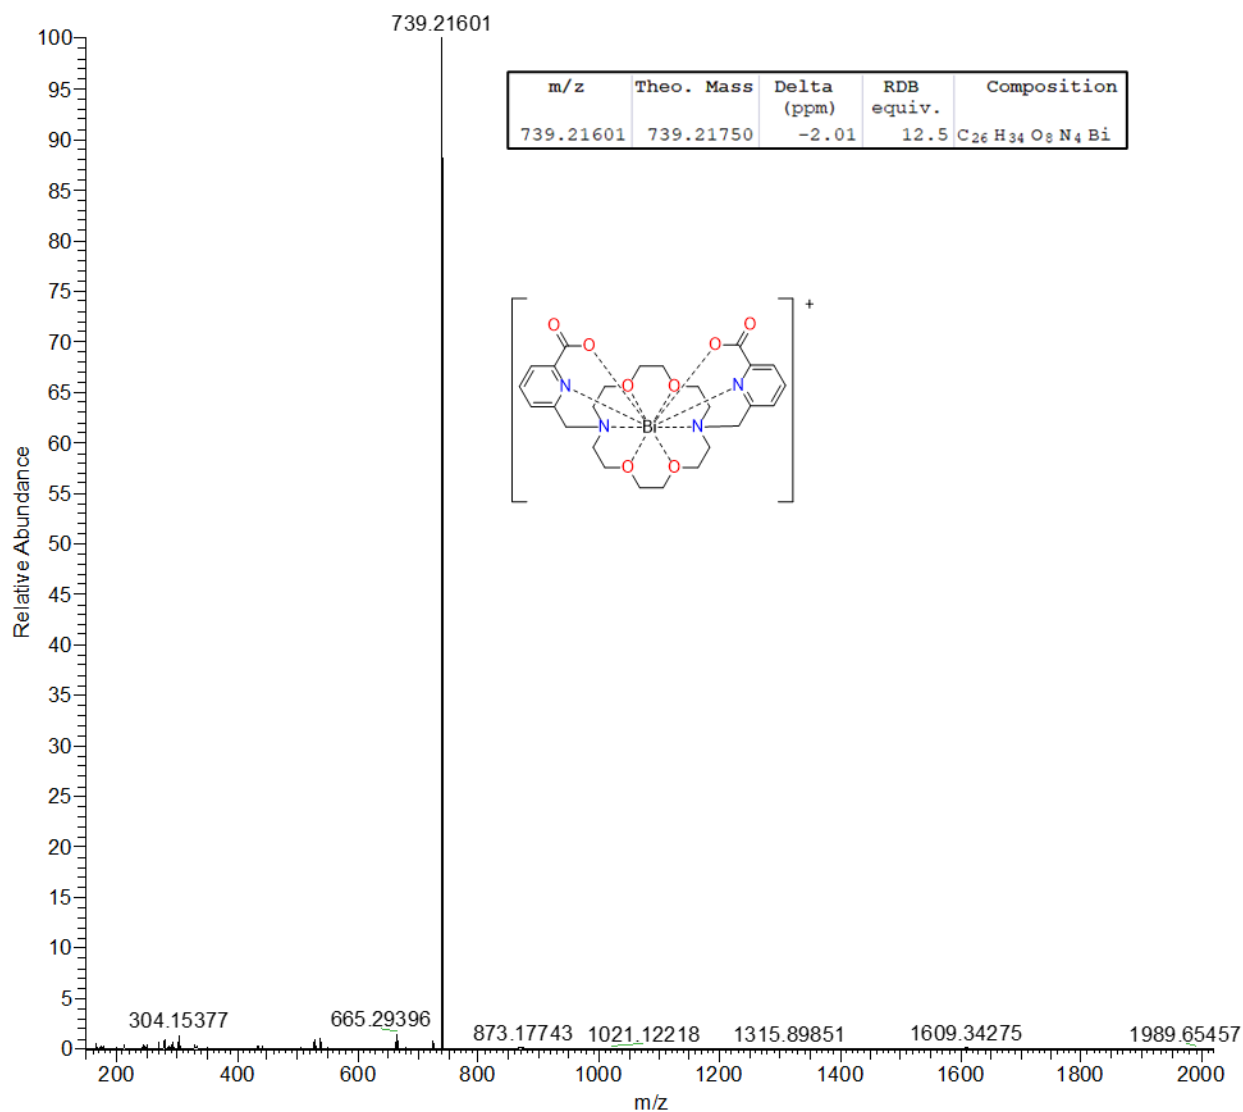

**Figure S10. ESI-HRMS of [Bi(macropa)]<sup>+</sup>.** The sample was diluted using a solution of CH<sub>3</sub>CN containing 1% formic acid. The sample was analyzed using a mobile phase of CH<sub>3</sub>CN. One ion peak was observed, corresponding to [M]<sup>+</sup> (*m/z* 739.21601).

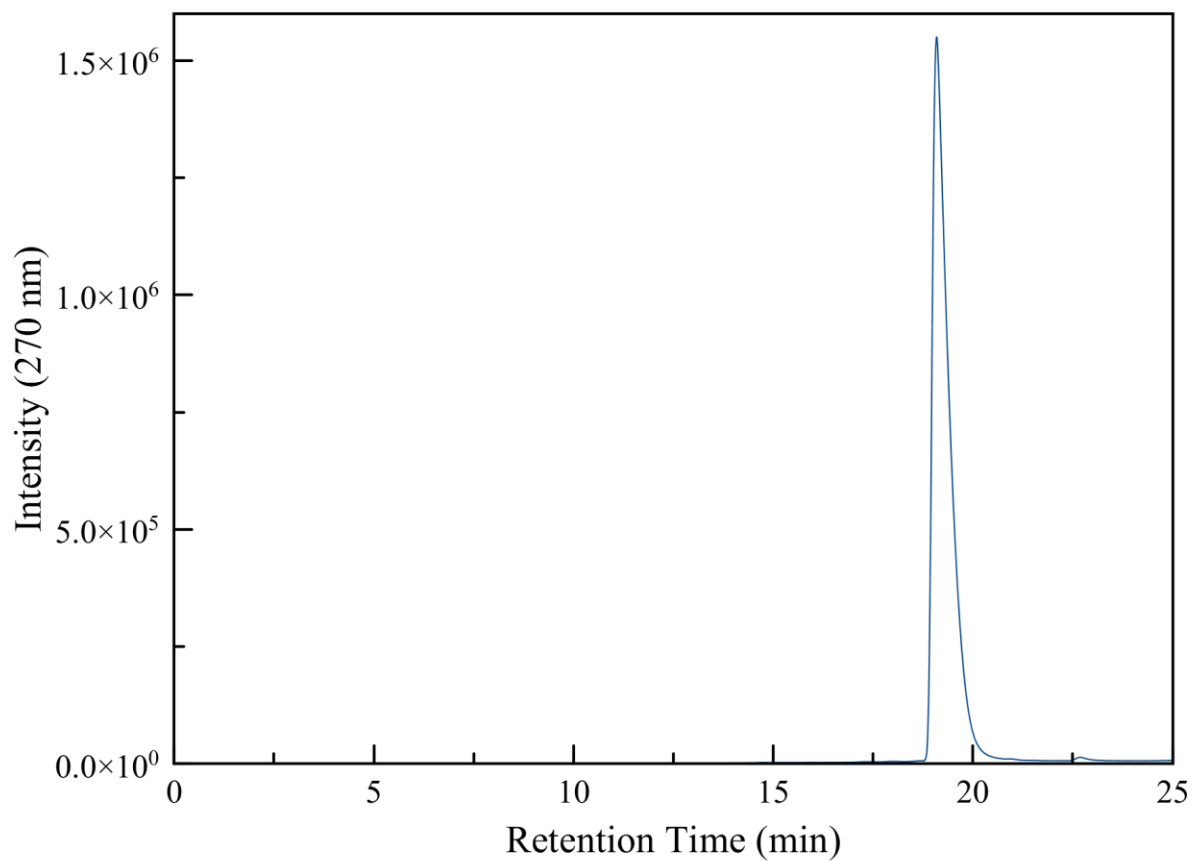

**Figure S11. HPLC chromatogram of [Bi(macropa)]<sup>+</sup>.** Retention time ( $t_R$ ) = 19.092 min using a binary MeOH/H<sub>2</sub>O mobile phase containing 0.1% TFA (program: 10% MeOH for 5 min, followed by a linear gradient to 100% MeOH over 20 min).

## 2.2.2 [Bi(macroquin-SO<sub>3</sub>)<sup>-</sup>]

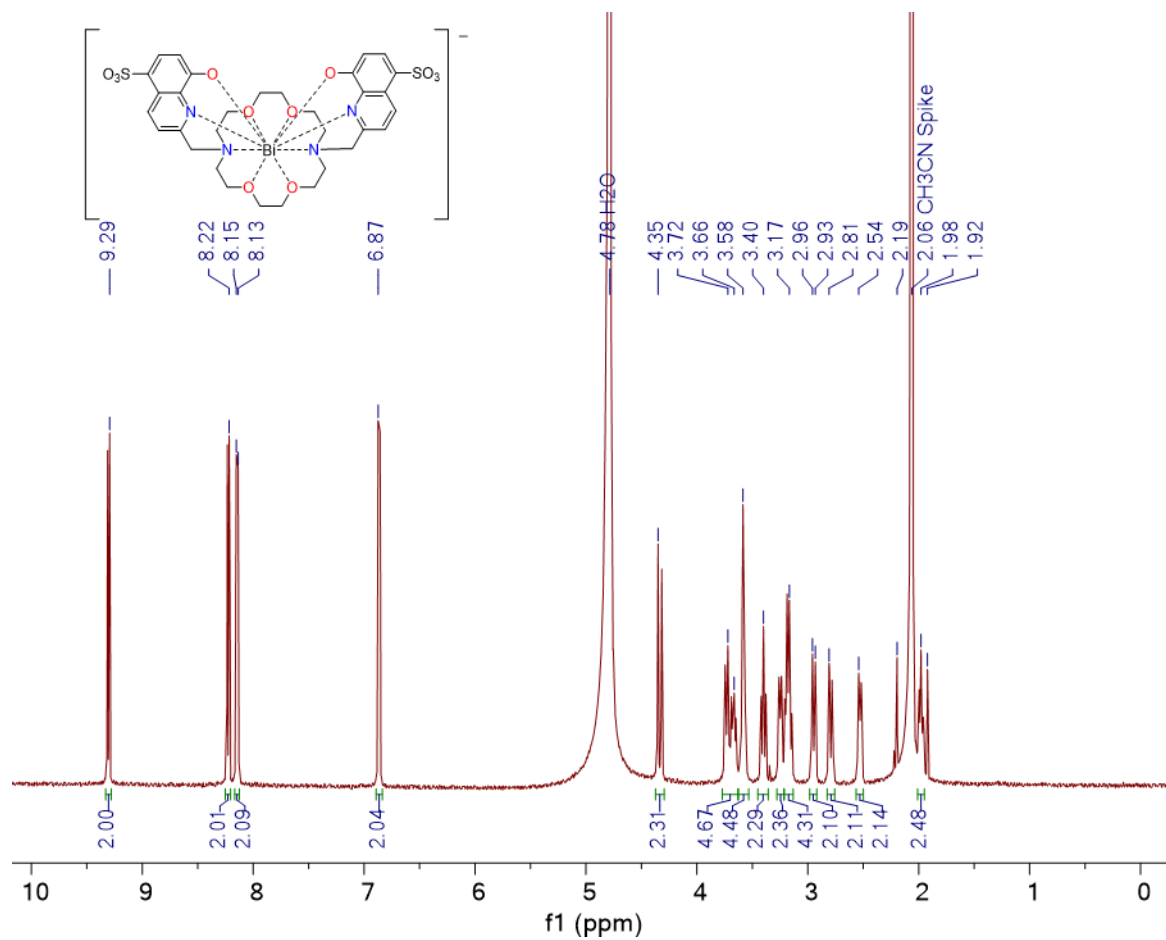

Figure

Figure S12. <sup>1</sup>H NMR spectrum of [Bi(macroquin-SO<sub>3</sub>)<sup>-</sup>]. 500 MHz, 298 K, D<sub>2</sub>O.

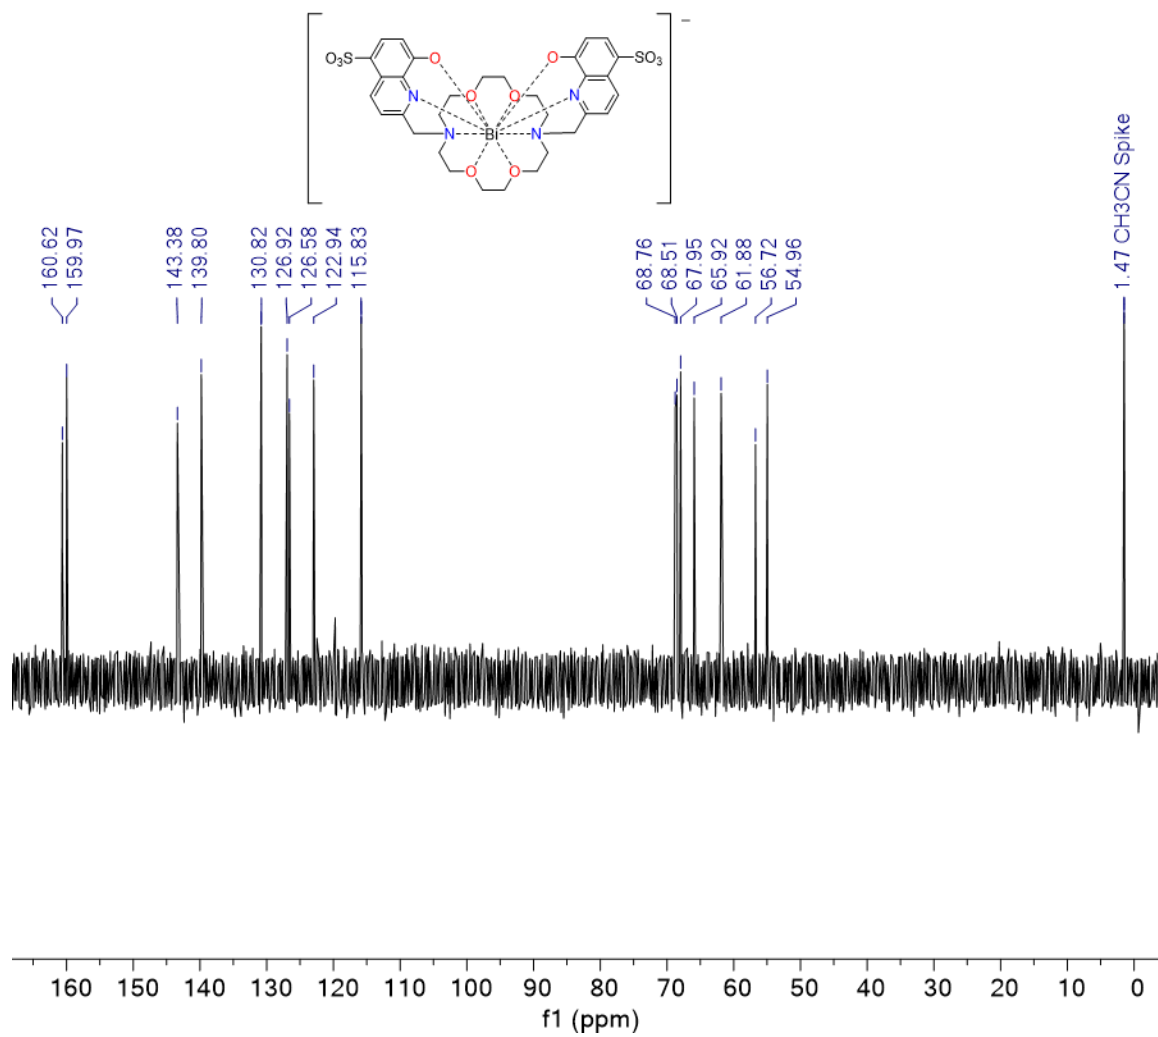

Figure

Figure S13.  $^{13}\text{C}\{^1\text{H}\}$  NMR spectrum of  $[\text{Bi}(\text{macroquin-SO}_3)]^-$ . 126 MHz, 298 K,  $\text{D}_2\text{O}$ .

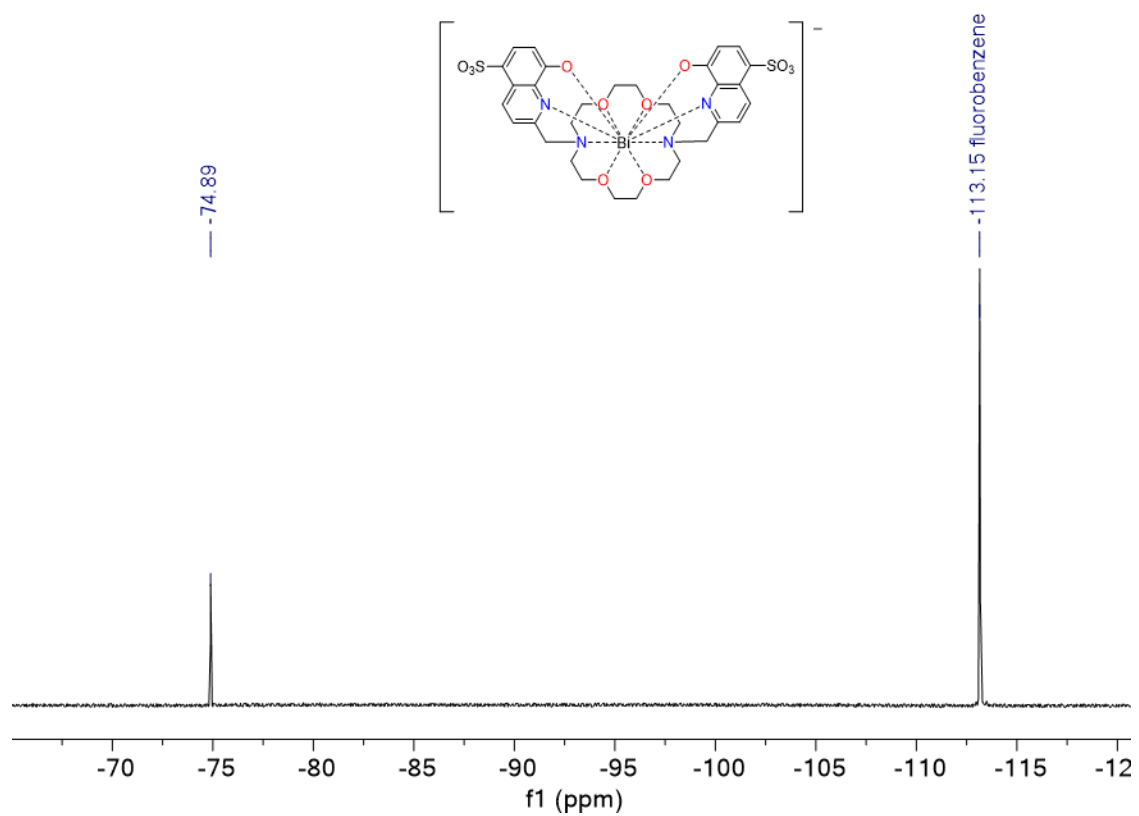

**Figure S14.**  $^{19}\text{F}$  NMR spectrum of  $[\text{Bi}(\text{macroquin-SO}_3)]^-$ . 470 MHz, 298 K,  $\text{D}_2\text{O}$ .



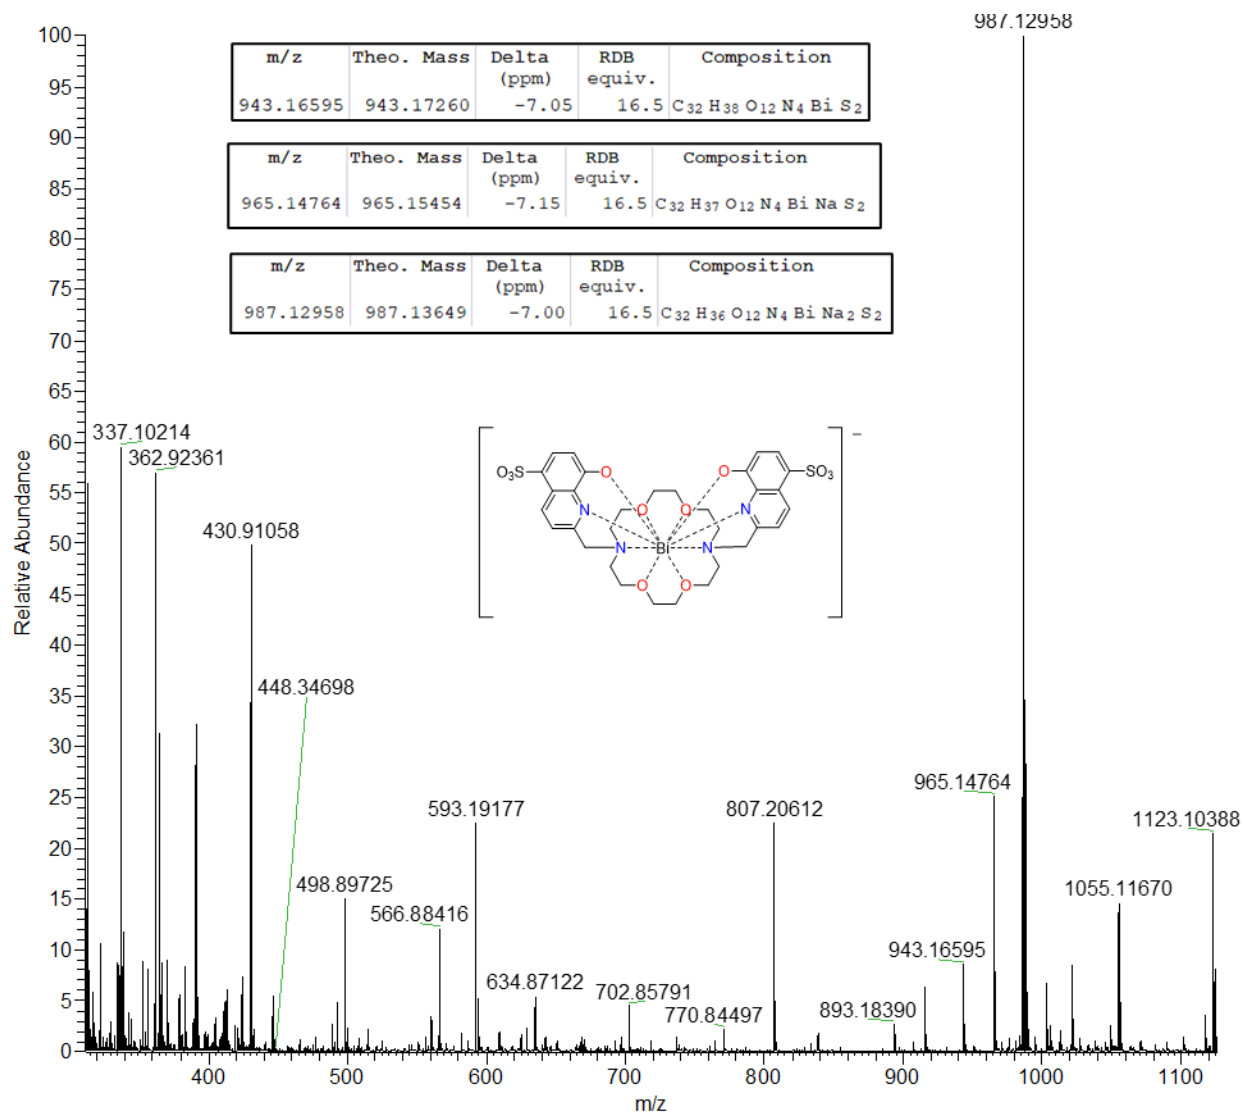

**Figure S15. ESI-HRMS of [Bi(macroquin-SO<sub>3</sub>)]<sup>-</sup>.** The sample was diluted using a solution of CH<sub>3</sub>CN:H<sub>2</sub>O (1:1) containing 1% formic acid. The sample was analyzed using a mobile phase of CH<sub>3</sub>CN:H<sub>2</sub>O (1:1). Three ion peaks were observed, corresponding to [M+H]<sup>+</sup> ( $m/z = 943.16595$ ), [M+Na]<sup>+</sup> ( $m/z = 965.14764$ ), [M+2Na-H]<sup>+</sup> ( $m/z = 987.12958$ ).

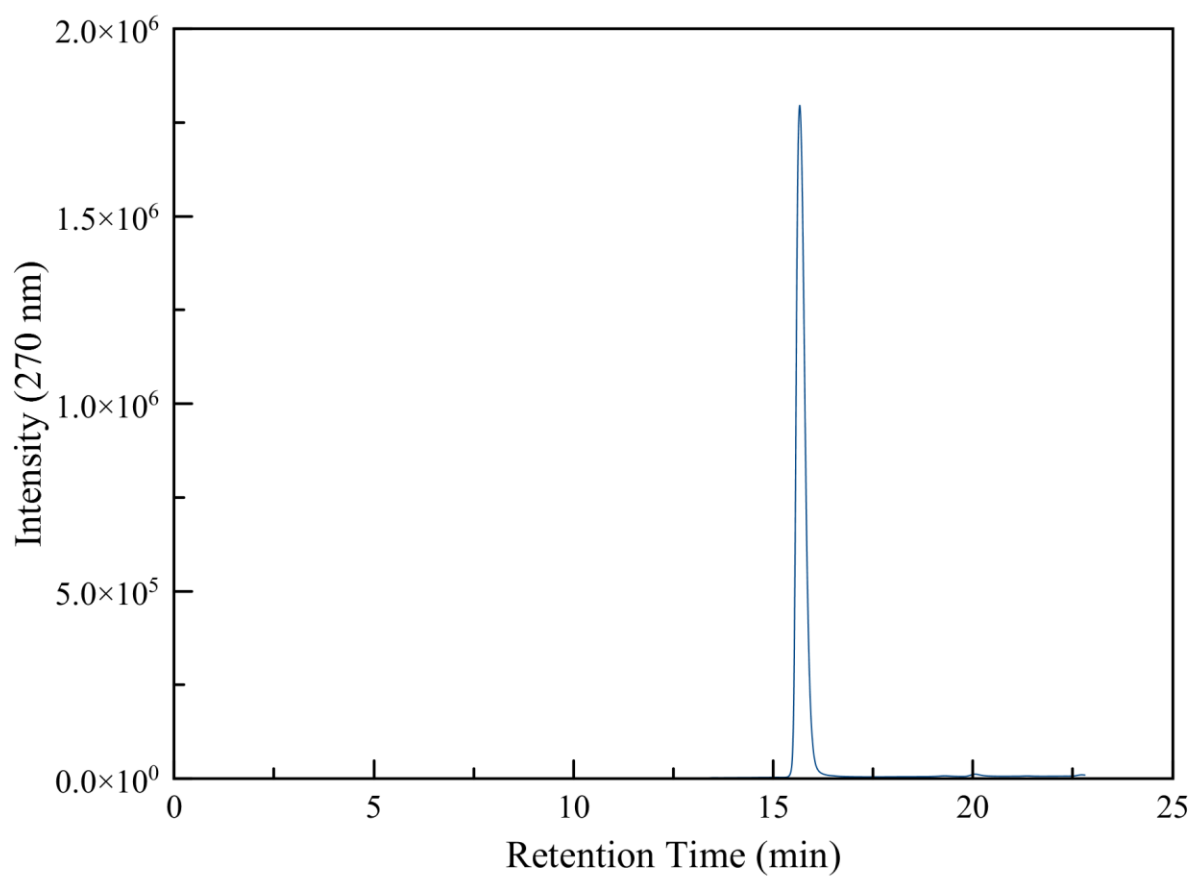

**Figure S16. HPLC chromatogram of [Bi(macroquin-SO<sub>3</sub>)]<sup>-</sup>.** Retention time ( $t_R$ ) = 15.663 min using a binary MeOH/H<sub>2</sub>O mobile phase containing 0.1% TFA (program: 10% MeOH for 5 min, followed by a linear gradient to 100% MeOH over 20 min).

### 2.2.3 [Bi(macrophospho)]<sup>+</sup>

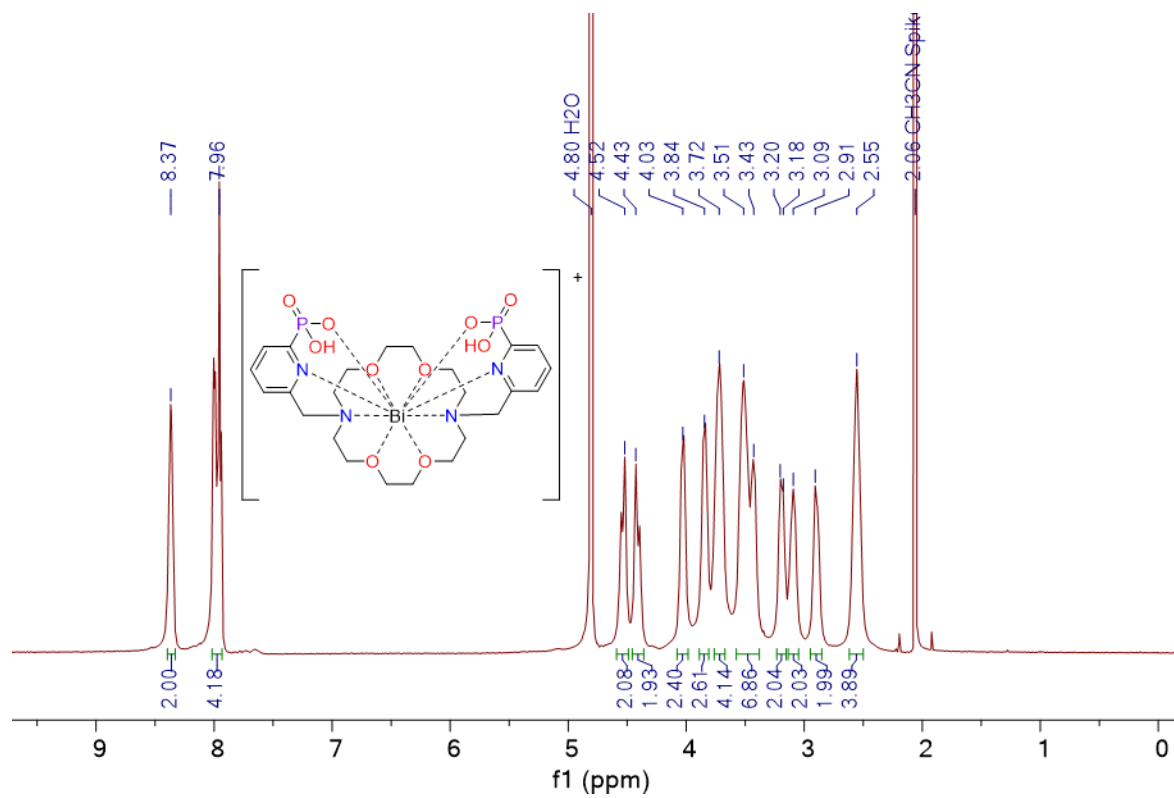

Figure S17. <sup>1</sup>H NMR spectrum of [Bi(macrophospho)]<sup>+</sup>. 500 MHz, 298 K, D<sub>2</sub>O.

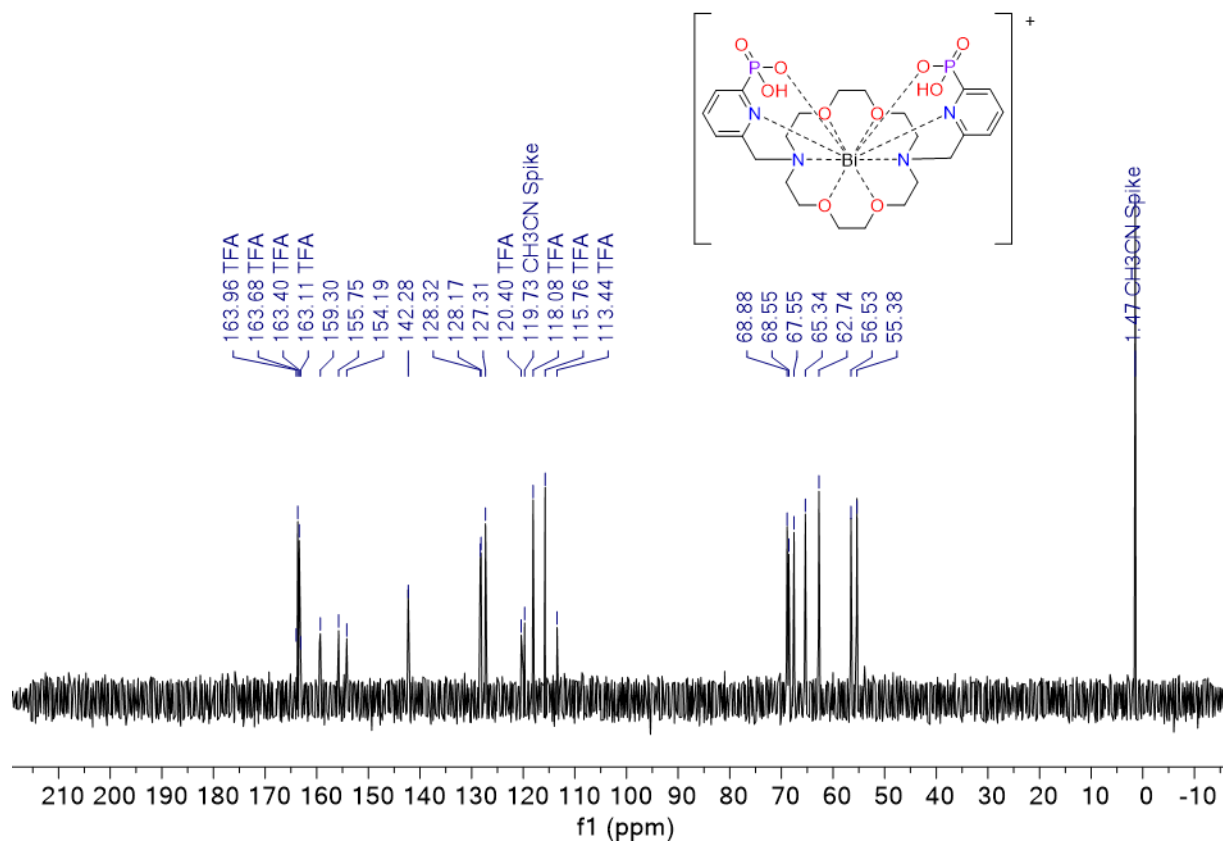

**Figure S18.**  $^{13}\text{C}\{^1\text{H}\}$  NMR spectrum of [Bi(macrophospha)]<sup>+</sup>. 126 MHz, 298 K, D<sub>2</sub>O.

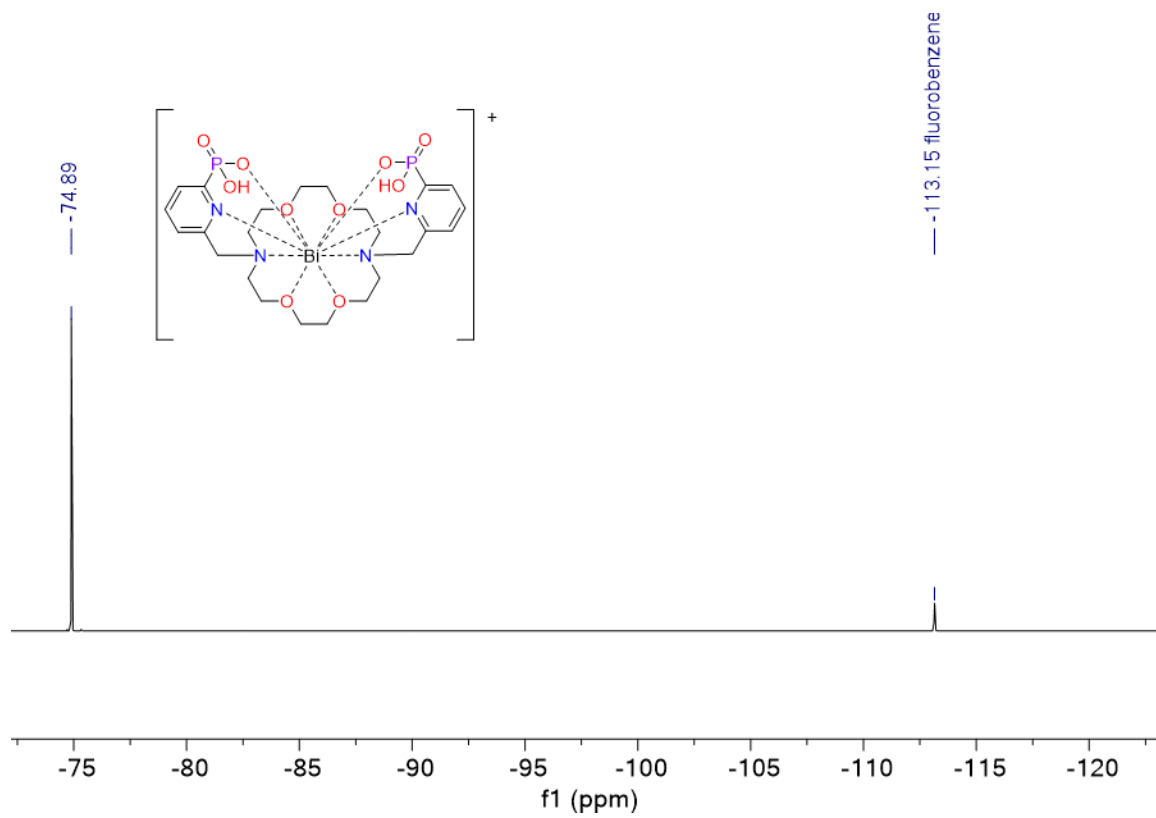

**Figure S19.**  $^{19}\text{F}$  NMR spectrum of  $[\text{Bi}(\text{macrophospha})]^+$ . 470 MHz, 298 K,  $\text{D}_2\text{O}$ .

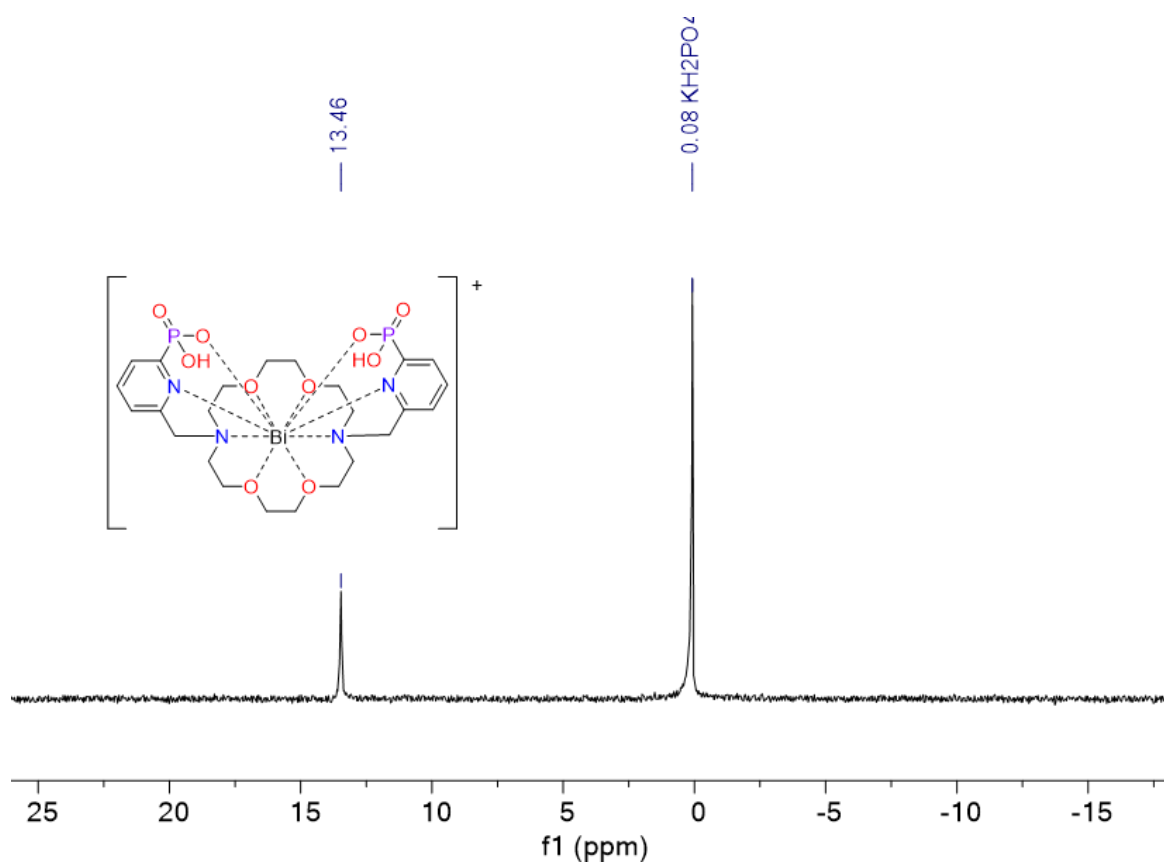

**Figure S20.**  $^{31}\text{P}\{^1\text{H}\}$  NMR spectrum of  $[\text{Bi}(\text{macrophospho})]^+$ . 202 MHz, 298 K,  $\text{D}_2\text{O}$ .

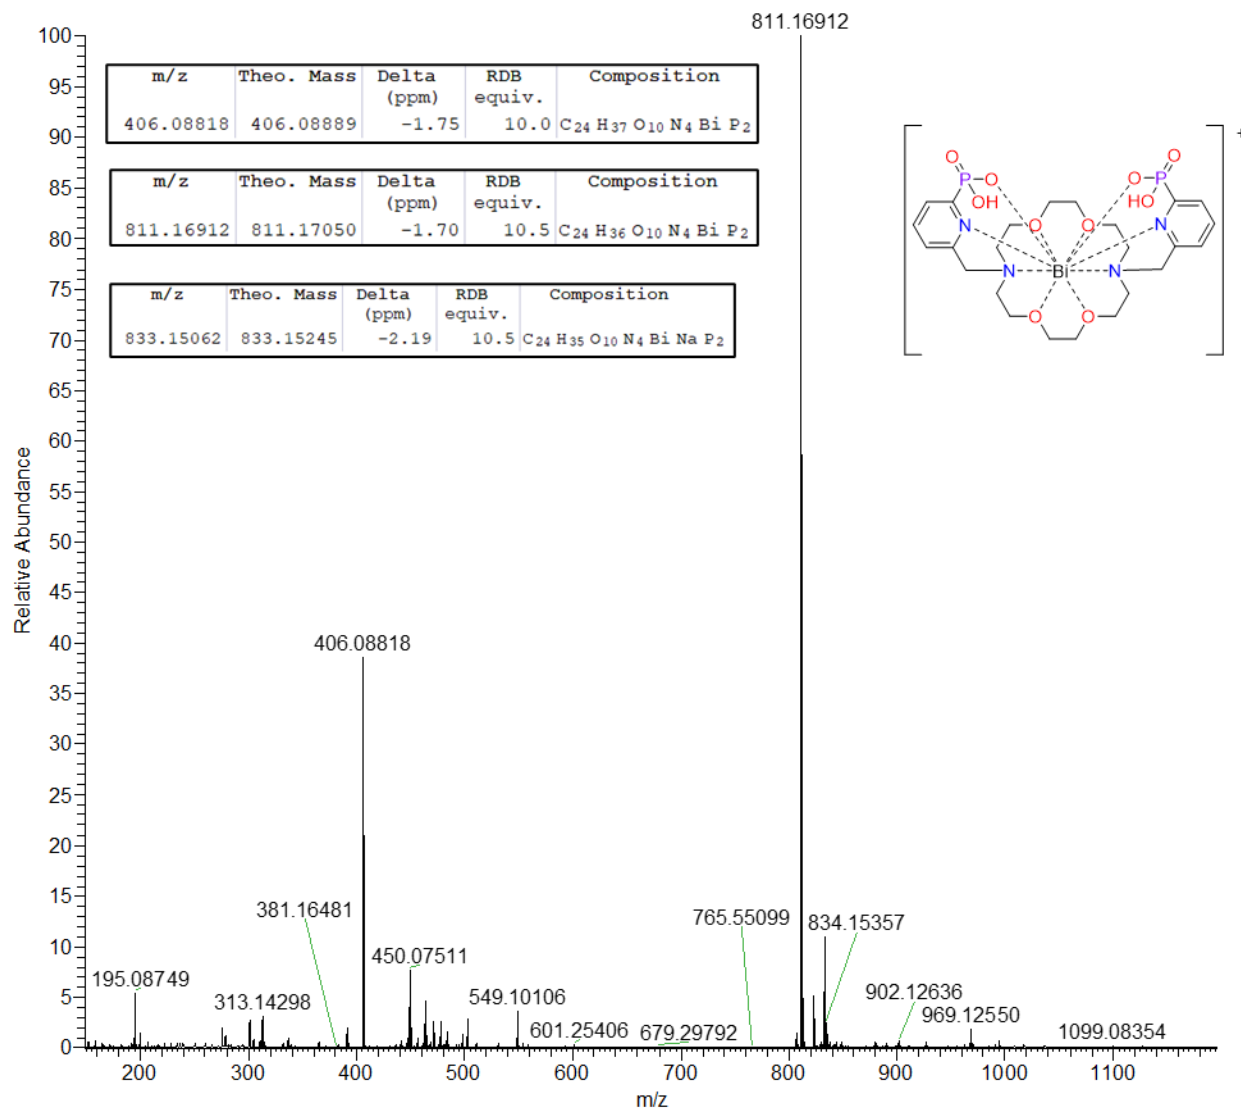

**Figure S21. ESI-HRMS of [Bi(macrophospho)]<sup>+</sup>.** The sample was diluted using a solution of CH<sub>3</sub>CN:H<sub>2</sub>O (1:1) containing 1% formic acid. The sample was analyzed using a mobile phase of CH<sub>3</sub>CN:H<sub>2</sub>O (1:1). Three ion peaks were observed, corresponding to [M+H]<sup>2+</sup> (*m/z* 406.08818), [M]<sup>+</sup> (*m/z* 811.16912), and [M+Na-H]<sup>+</sup> (*m/z* 833.15062).

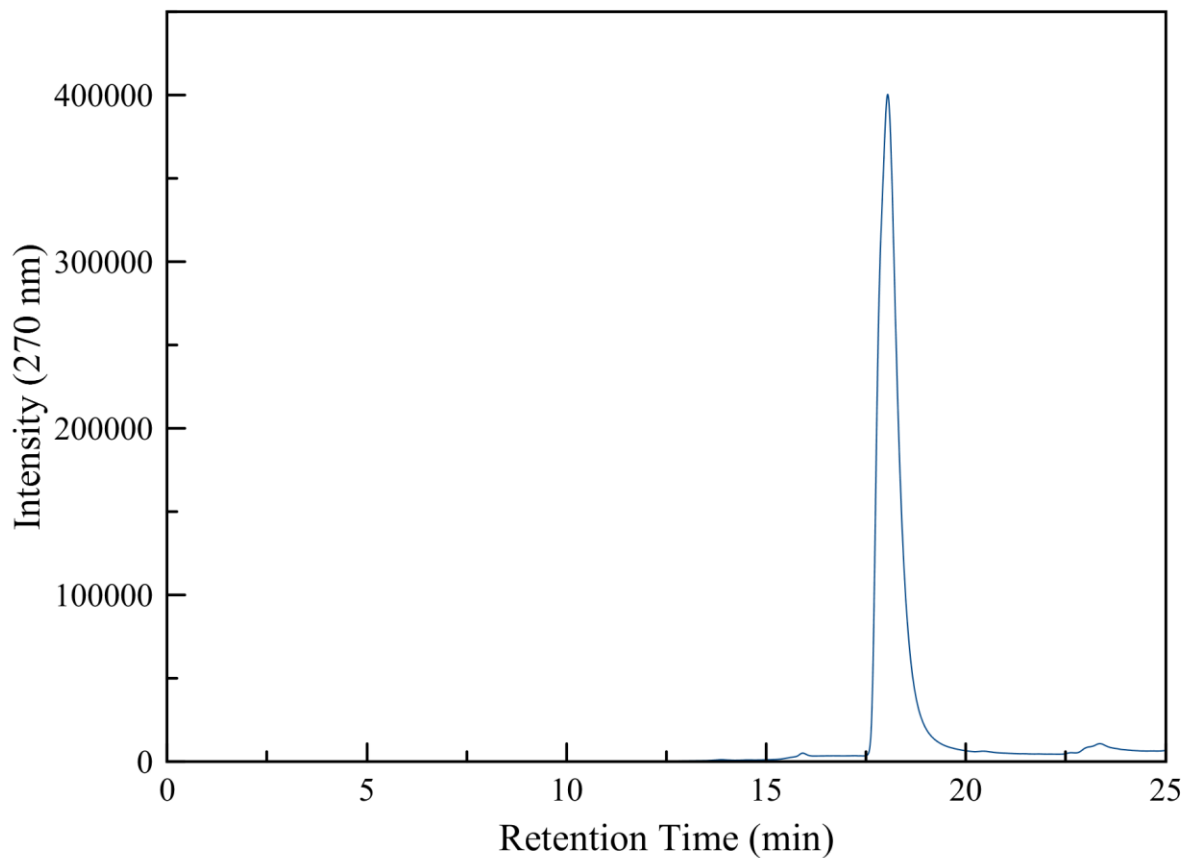

**Figure S22. HPLC chromatogram of [Bi(macrophospho)]<sup>+</sup>.** Retention time ( $t_R$ ) = 18.041 min using a binary MeOH/H<sub>2</sub>O mobile phase containing 0.1% TFA (program: 10% MeOH for 5 min, followed by a linear gradient to 100% MeOH over 20 min).



## 2.2.4 [Bi(macrophosphi)]<sup>+</sup>

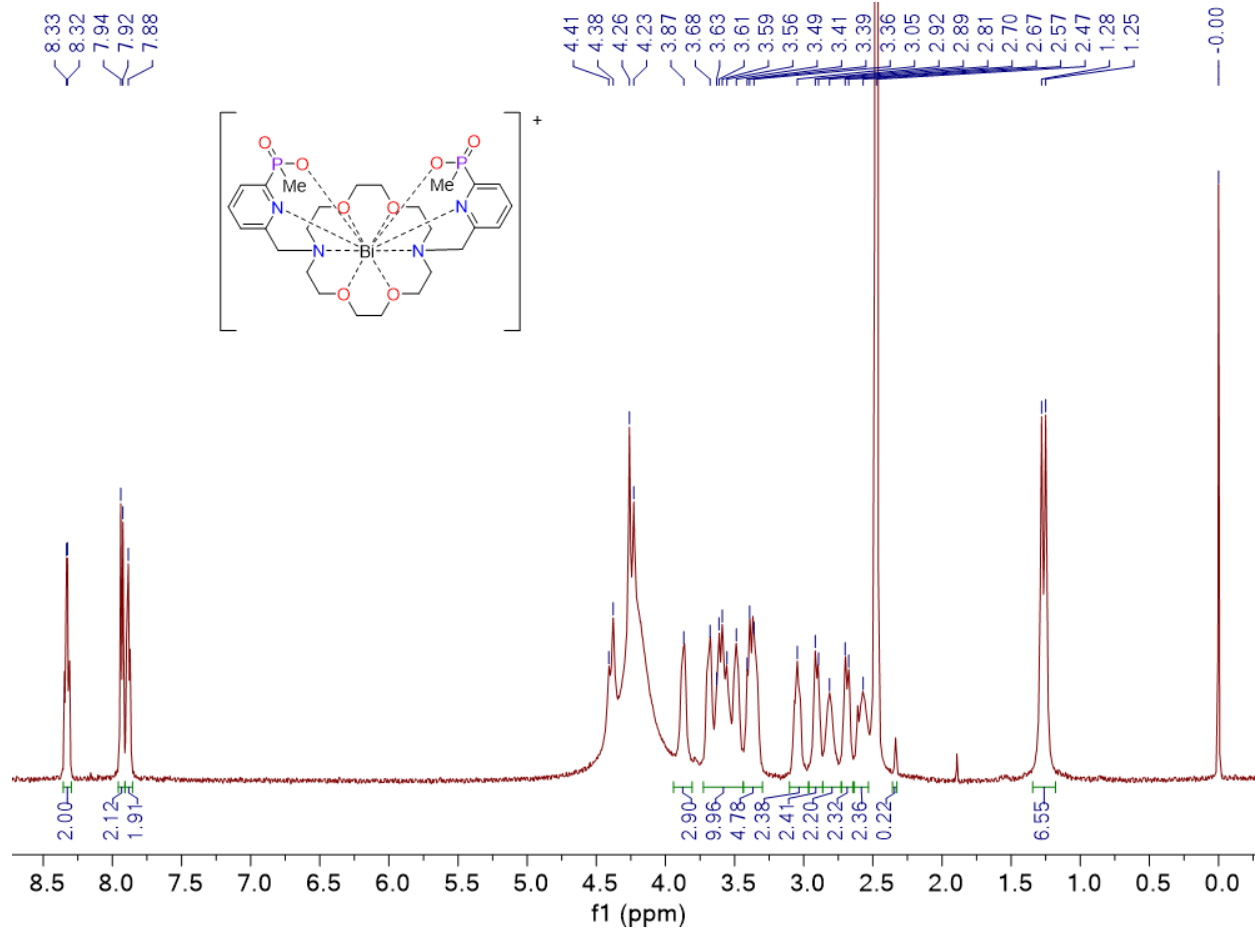

Figure S23. <sup>1</sup>H NMR spectrum of [Bi(macrophosphi)]<sup>+</sup>. 500 MHz, 393.2 K, DMSO-d<sub>6</sub>.

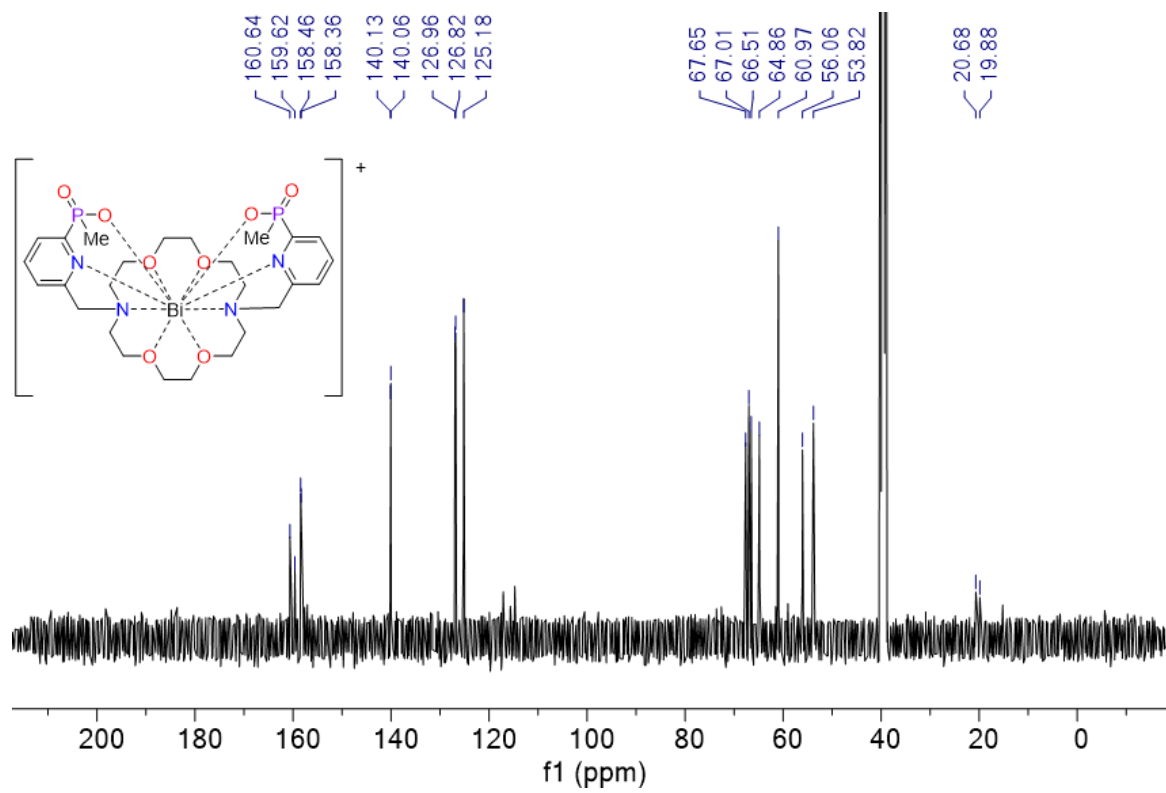

**Figure S24.**  $^{13}\text{C}\{^1\text{H}\}$  NMR spectrum of [Bi(macrophosphi)]<sup>+</sup>. 126 MHz, 393.2 K, DMSO- $d_6$ .

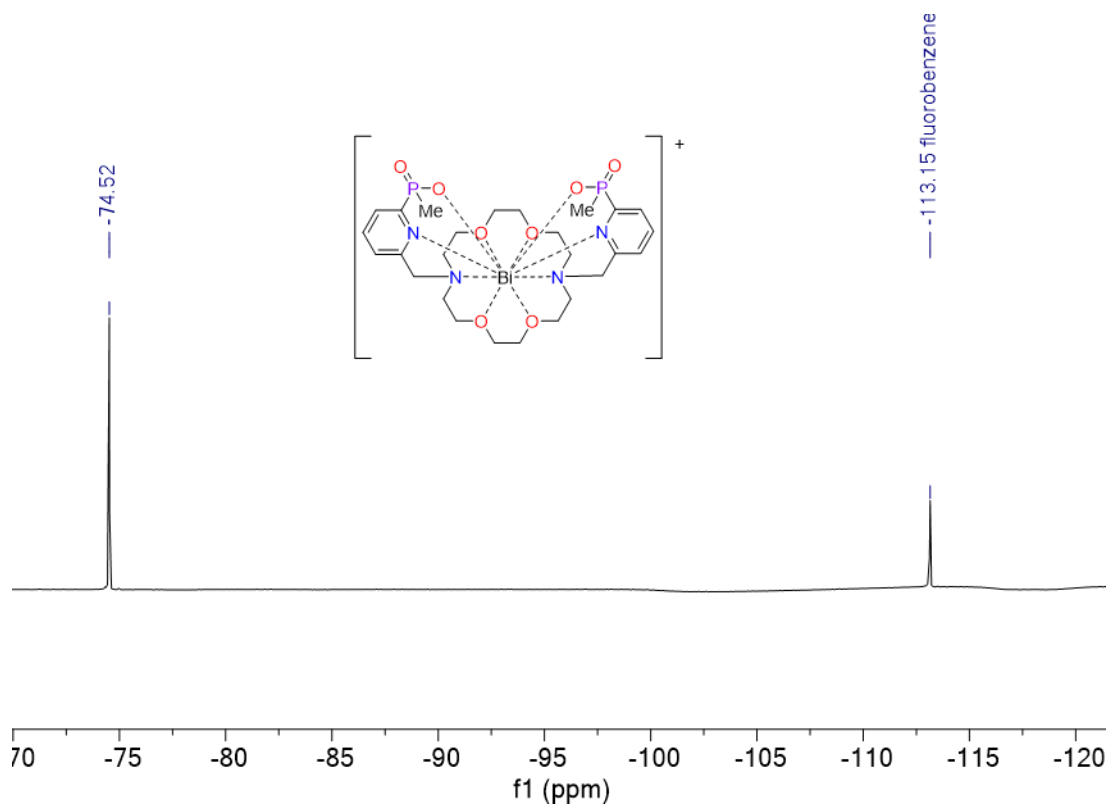

**Figure S25.**  $^{19}\text{F}$  NMR spectrum of  $[\text{Bi}(\text{macrophosphi})]^+$ . 470 MHz, 393.2 K,  $\text{DMSO-d}_6$ .

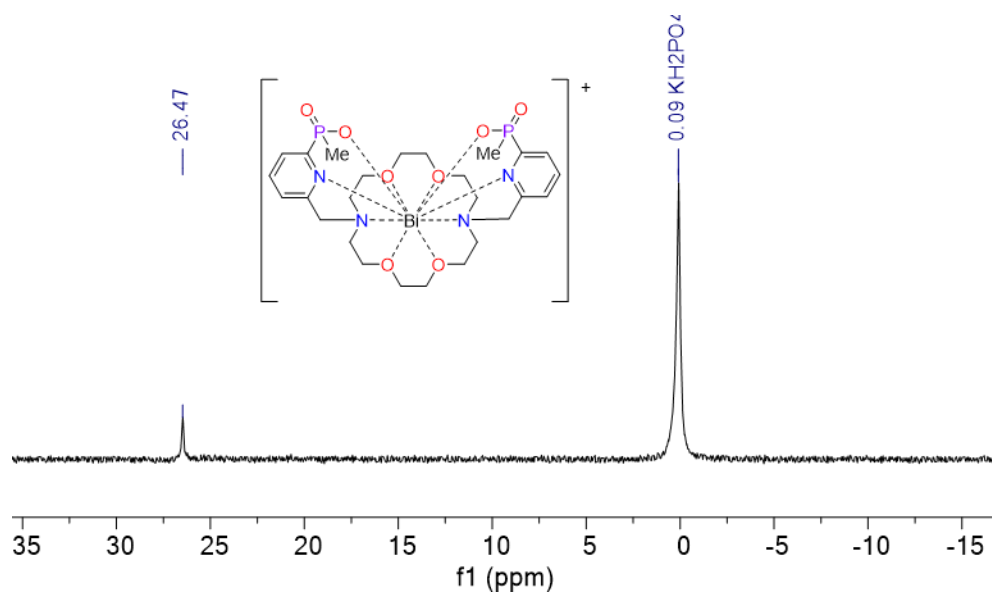

**Figure S26.**  $^{31}\text{P}\{^1\text{H}\}$  NMR spectrum of [Bi(macrophosphi)]<sup>+</sup>. 202 MHz, 393.2 K, DMSO-d<sub>6</sub>.

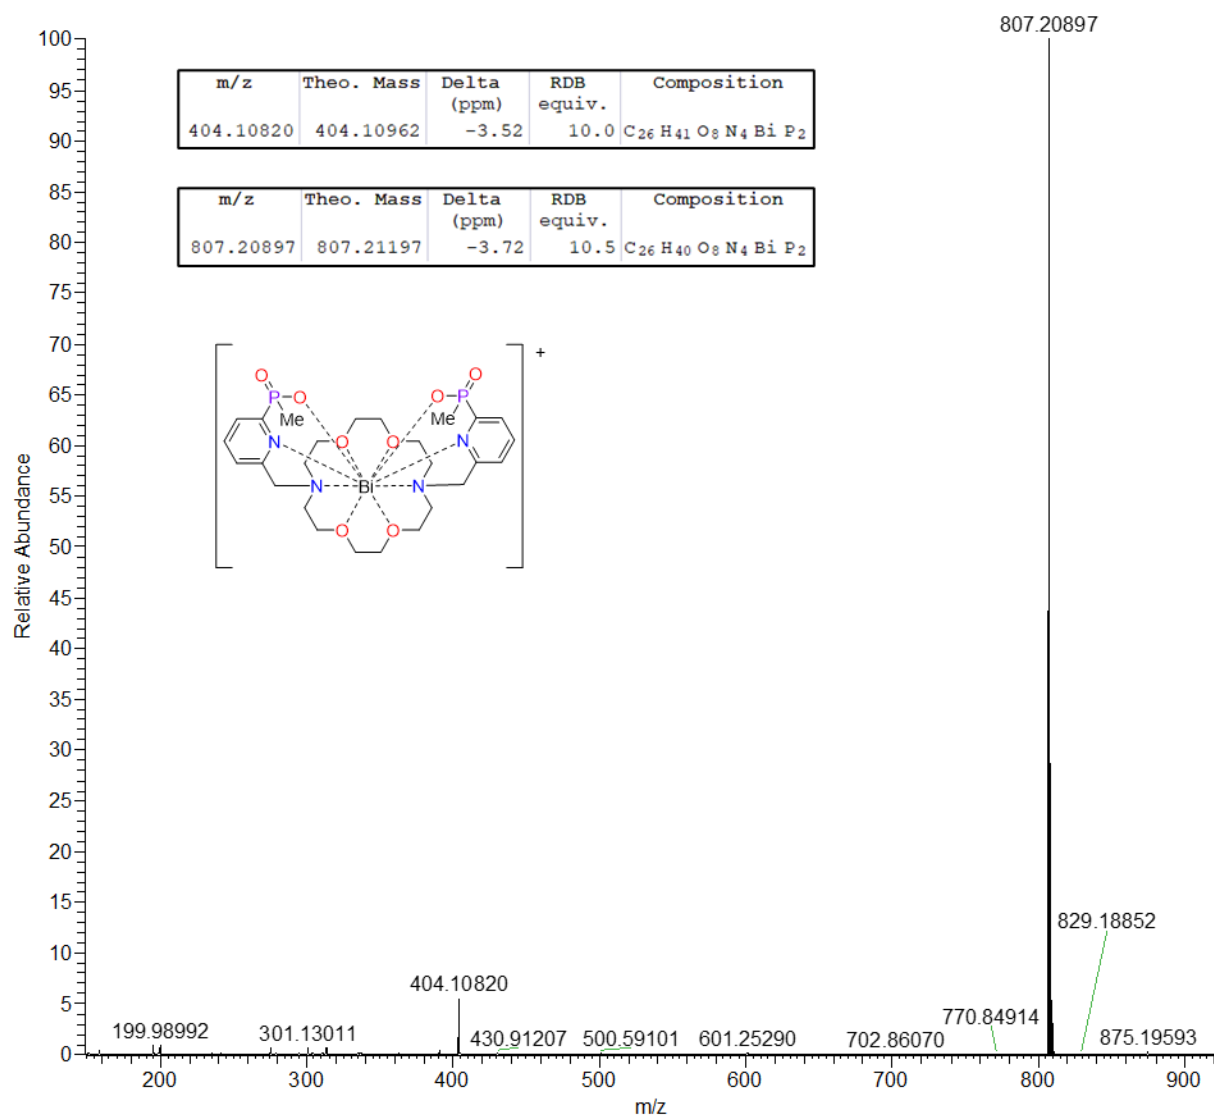

**Figure S27. ESI-HRMS of [Bi(macrophosphi)]<sup>+</sup>.** The sample was diluted using a solution of CH<sub>3</sub>CN:H<sub>2</sub>O (1:1) containing 1% formic acid. The sample was analyzed using a mobile phase of CH<sub>3</sub>CN:H<sub>2</sub>O (1:1). Two ion peaks were observed, corresponding to [M+H]<sup>2+</sup> (*m/z* 404.10820) and [M]<sup>+</sup> (*m/z* 807.20897).

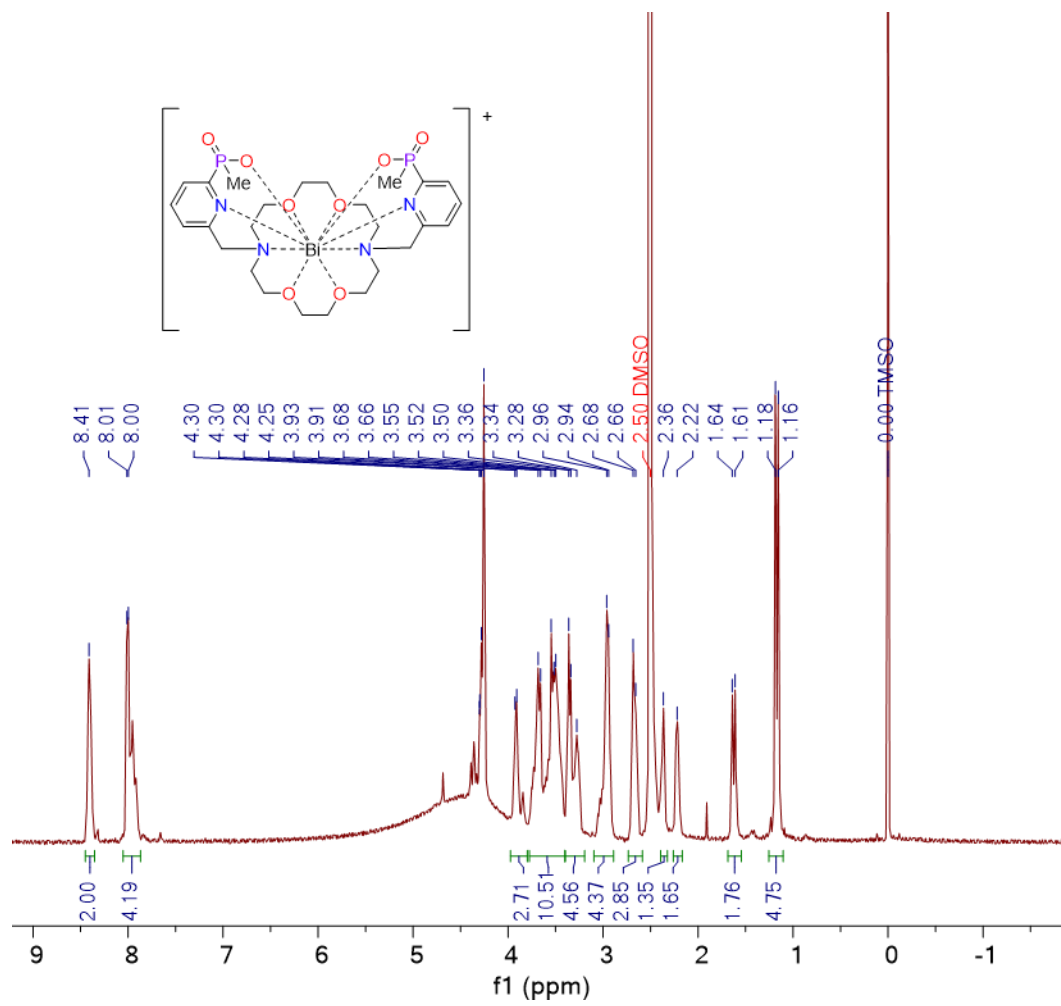

Figure S28.  $^1\text{H}$  NMR spectrum of [Bi(macrophosphi)] $^+$ . 500 MHz, 298 K, DMSO- $d_6$ .

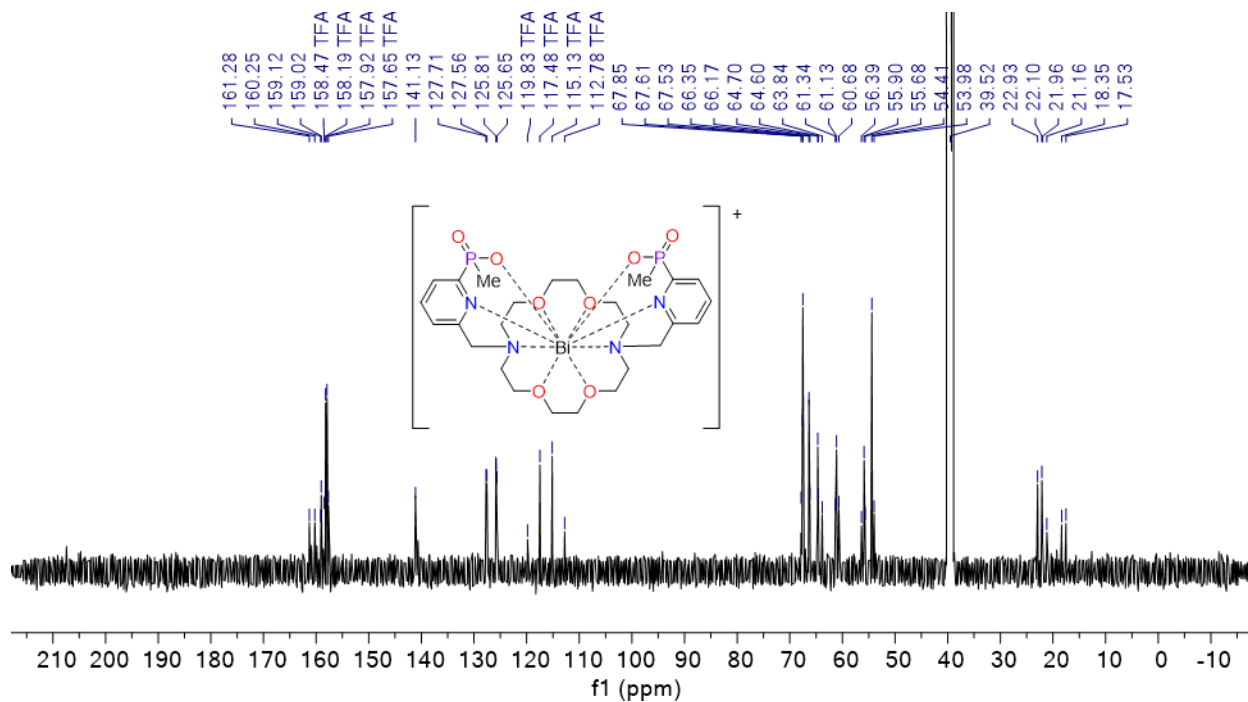

**Figure S29.**  $^{13}\text{C}\{^1\text{H}\}$  NMR spectrum of  $[\text{Bi}(\text{macrophosphi})]^+$ . 126 MHz, 298 K,  $\text{DMSO-d}_6$ .

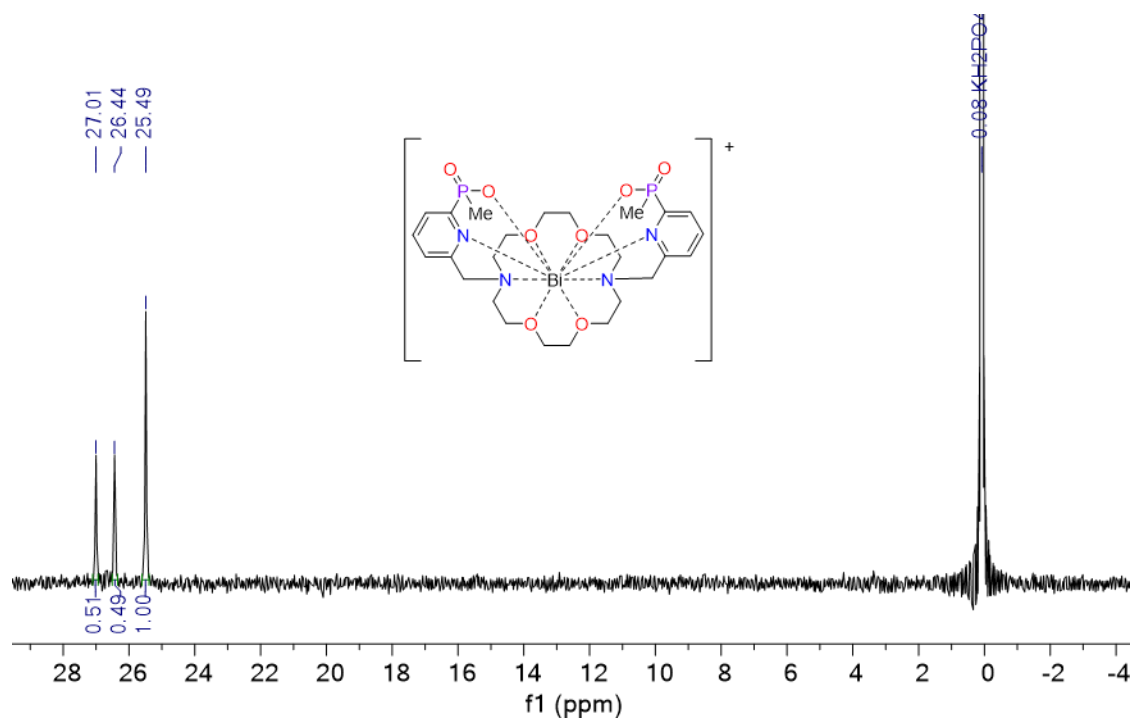

**Figure S30.**  $^{31}\text{P}\{^1\text{H}\}$  NMR spectrum of  $[\text{Bi}(\text{macrophosphi})]^+$ . 202 MHz, 298 K,  $\text{DMSO-d}_6$ .



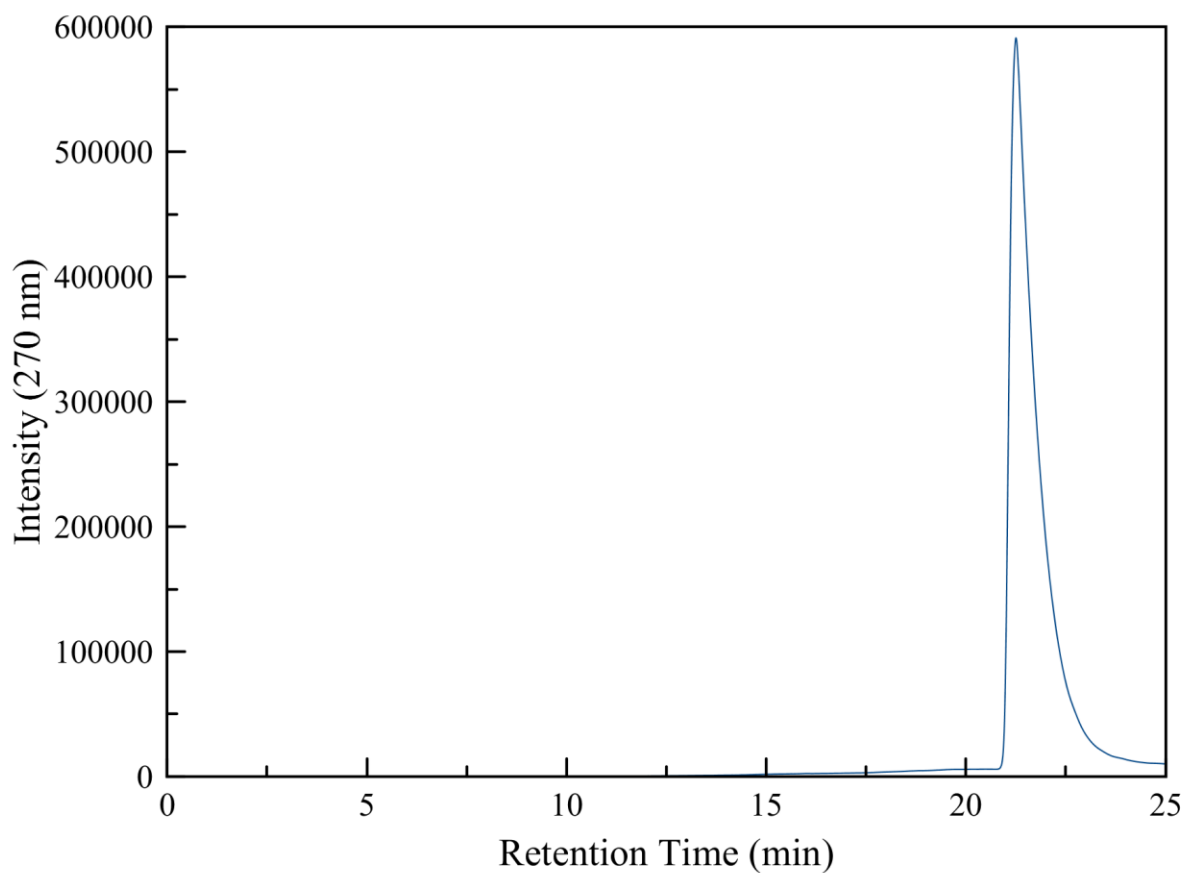

**Figure S31. HPLC chromatogram of [Bi(macrophosphi)]<sup>+</sup>.** Retention time ( $t_R$ ) = 21.253 min using a binary MeOH/H<sub>2</sub>O mobile phase containing 0.1% TFA (program: 10% MeOH for 5 min, followed by a linear gradient to 100% MeOH over 20 min).

## 2.2.5 [Bi(CHX-macropa)]<sup>+</sup>

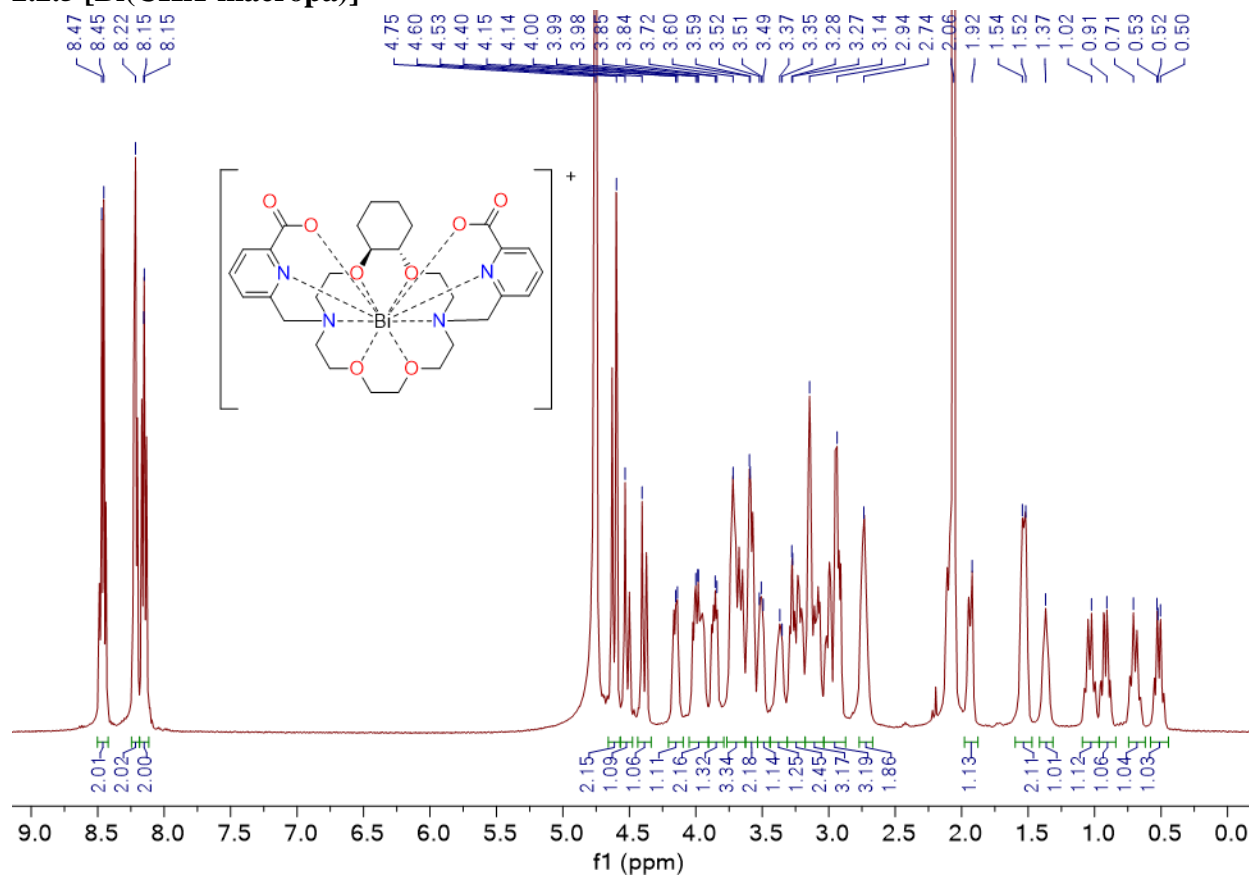

Figure S32. <sup>1</sup>H NMR spectrum of [Bi(CHX-macropa)]<sup>+</sup>. 500 MHz, 298 K, D<sub>2</sub>O.

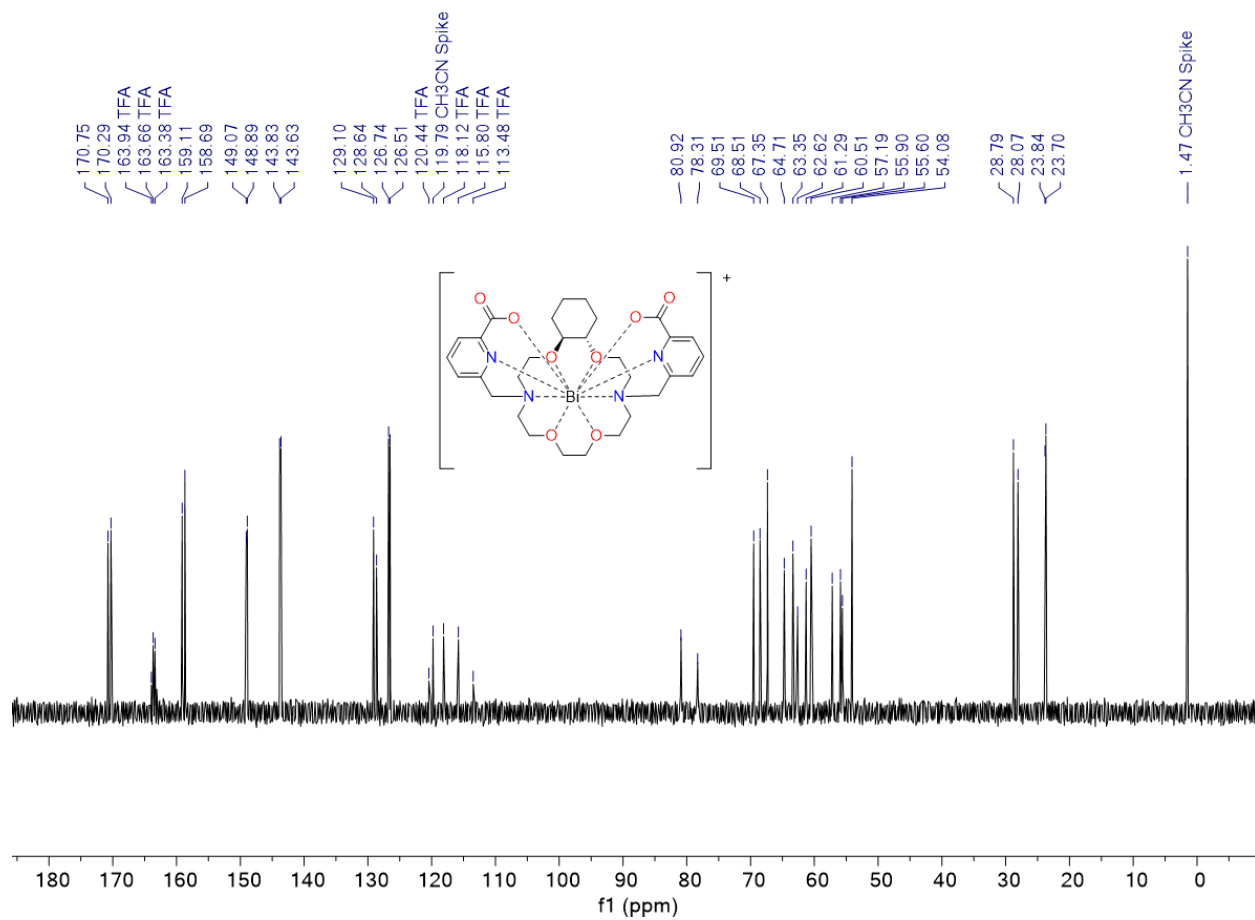

**Figure S33.**  $^{13}\text{C}\{^1\text{H}\}$  NMR spectrum of  $[\text{Bi}(\text{CHX-macropa})]^+$ . 126 MHz, 298 K,  $\text{D}_2\text{O}$ .

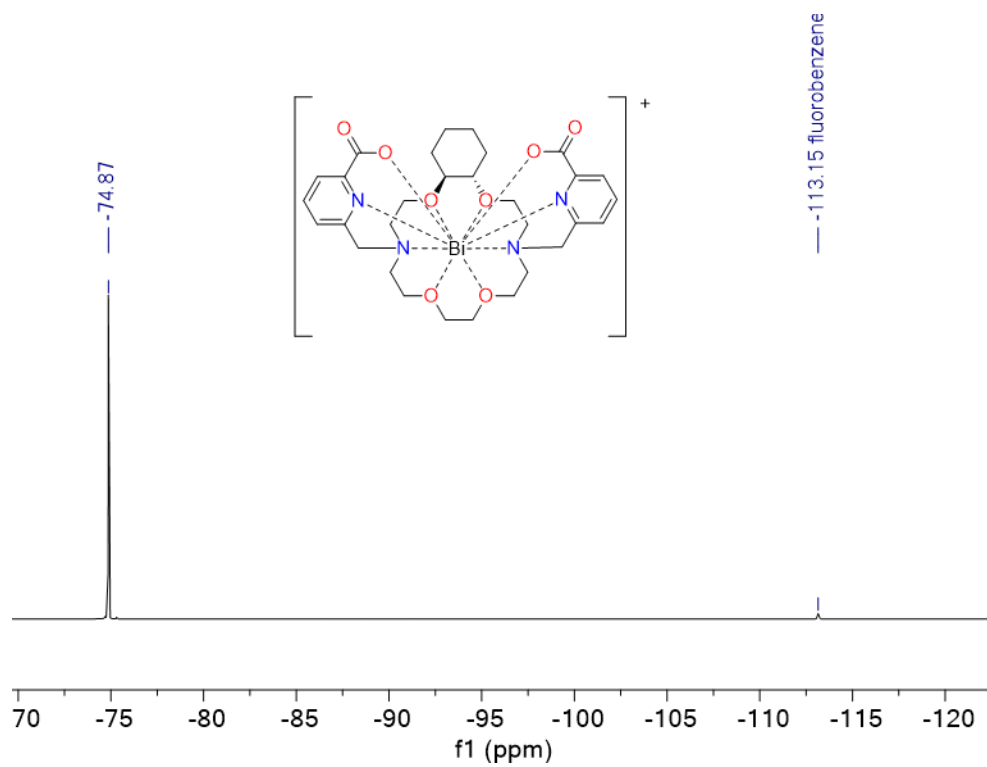

**Figure S34.**  $^{19}\text{F}$  NMR spectrum of  $[\text{Bi}(\text{CHX-macropa})]^+$ . 470 MHz, 298 K,  $\text{D}_2\text{O}$ .

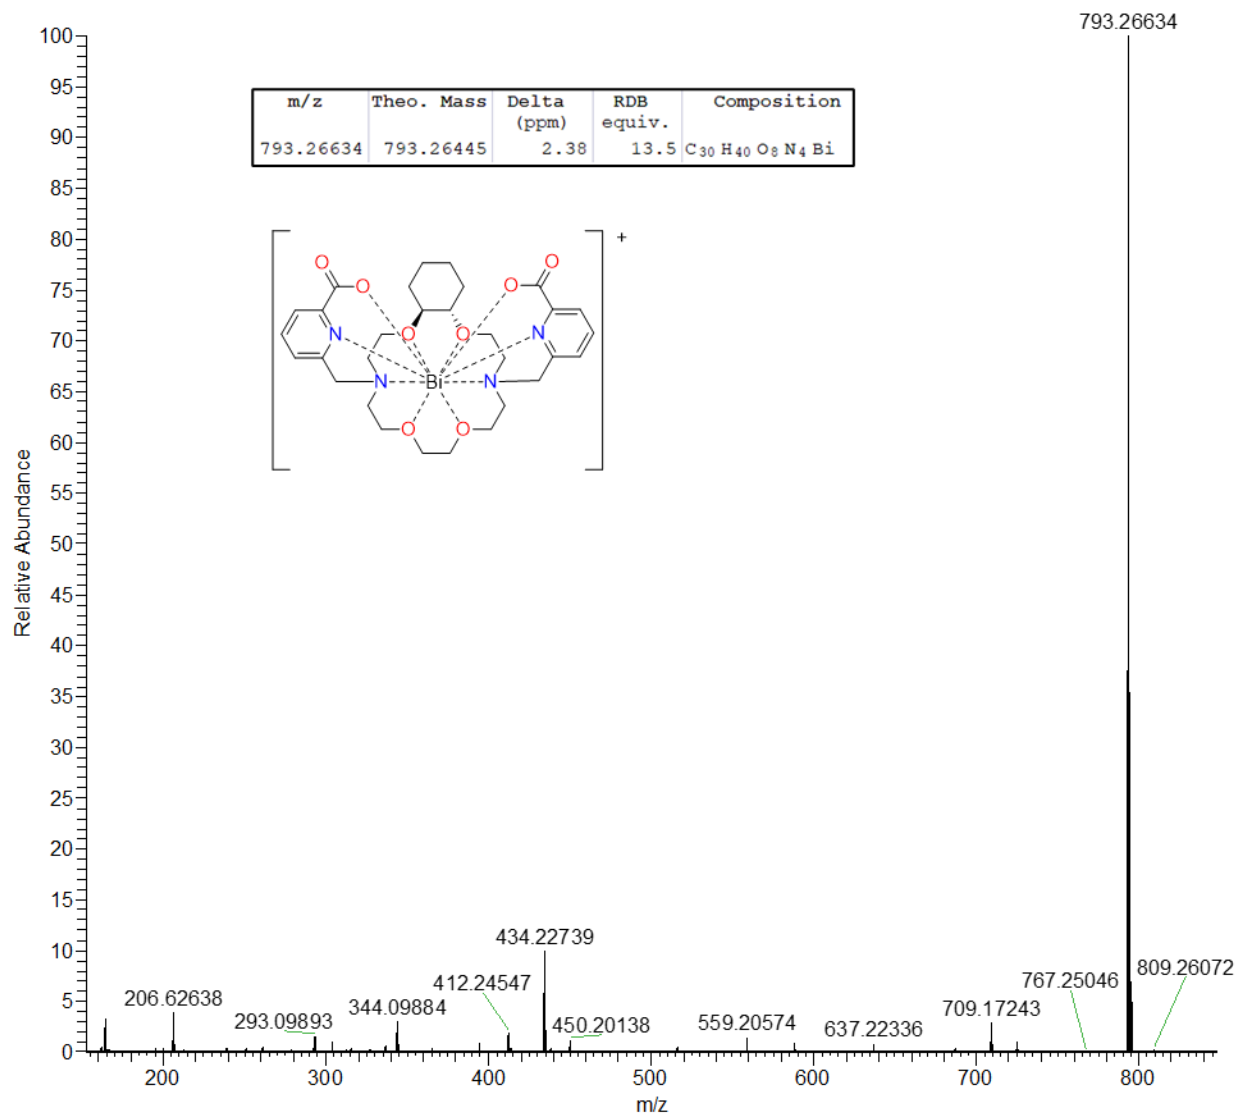

**Figure S35. ESI-HRMS of [Bi(CHX-macropa)]<sup>+</sup>.** The sample was diluted using a solution of CH<sub>3</sub>CN:H<sub>2</sub>O (7:3) containing 1% formic acid. The sample was analyzed using a mobile phase of CH<sub>3</sub>CN:H<sub>2</sub>O (7:3). One ion peak was observed, corresponding to [M]<sup>+</sup> (*m/z* 793.26634).

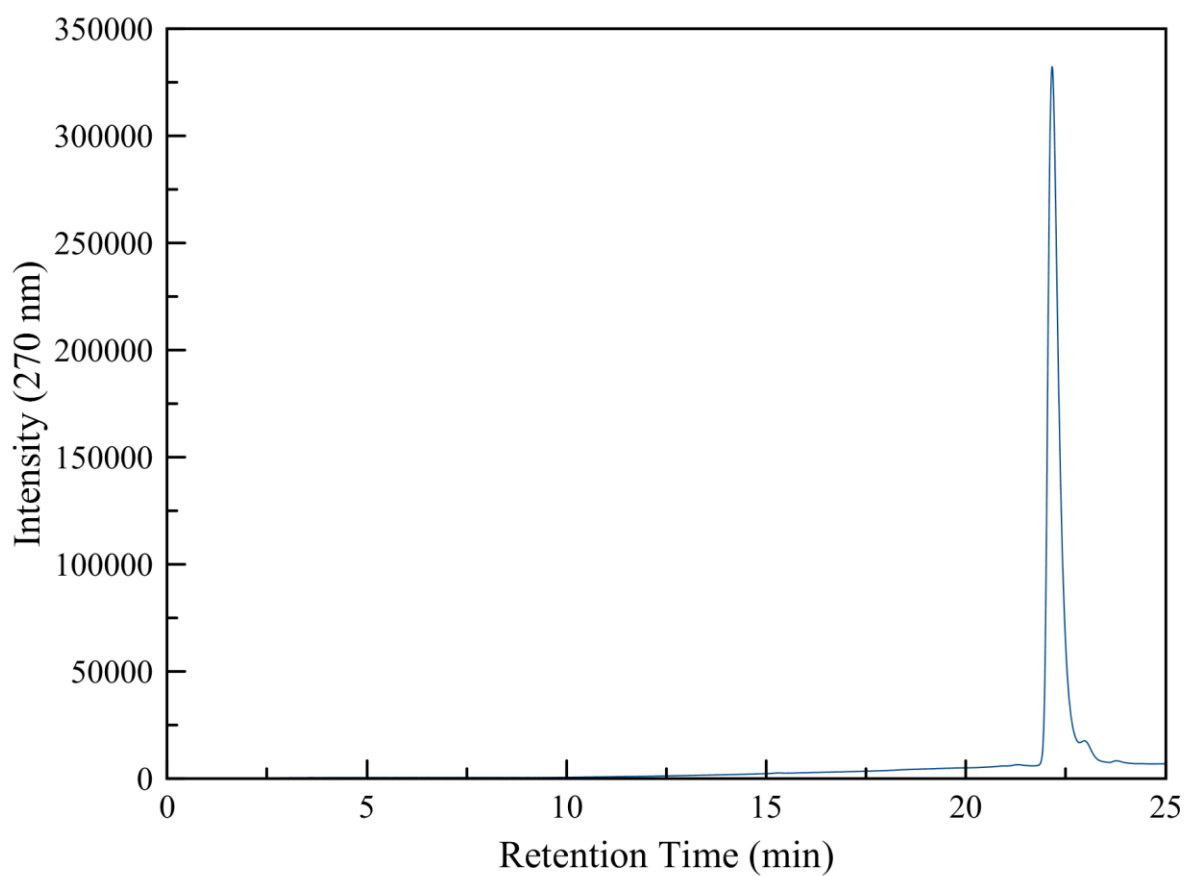

**Figure S36. HPLC chromatogram of  $[\text{Bi}(\text{CHX-macropa})]^+$ .** Retention time ( $t_R$ ) = 22.159 min using a binary MeOH/H<sub>2</sub>O mobile phase containing 0.1% TFA (program: 10% MeOH for 5 min, followed by a linear gradient to 100% MeOH over 20 min).

## 2.2.6 [Bi(macropaquin)]<sup>+</sup>

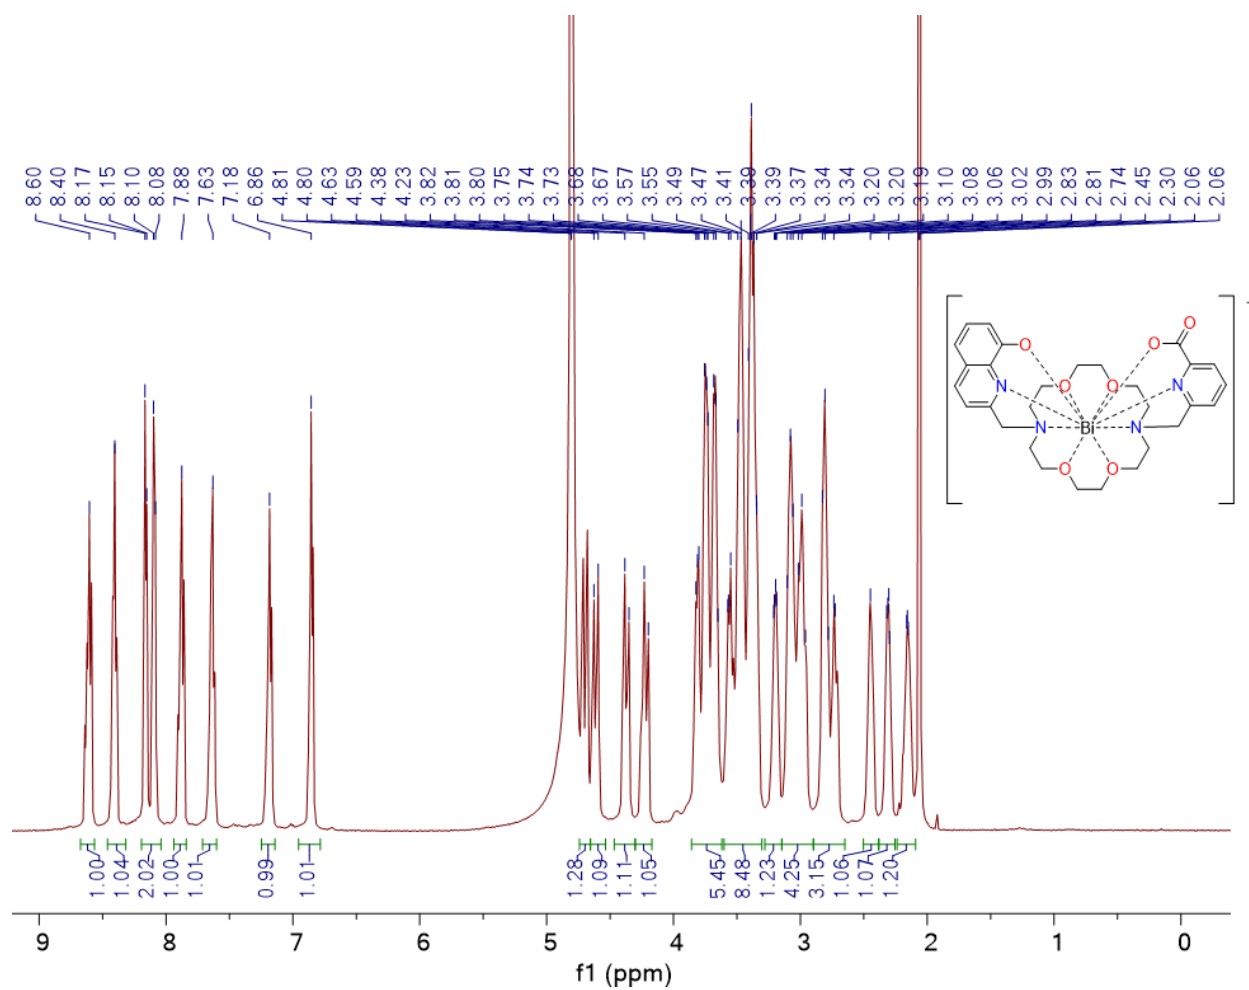

Figure S37. <sup>1</sup>H NMR spectrum of [Bi(macropaquin)]<sup>+</sup>. 500 MHz, 298 K, D<sub>2</sub>O.

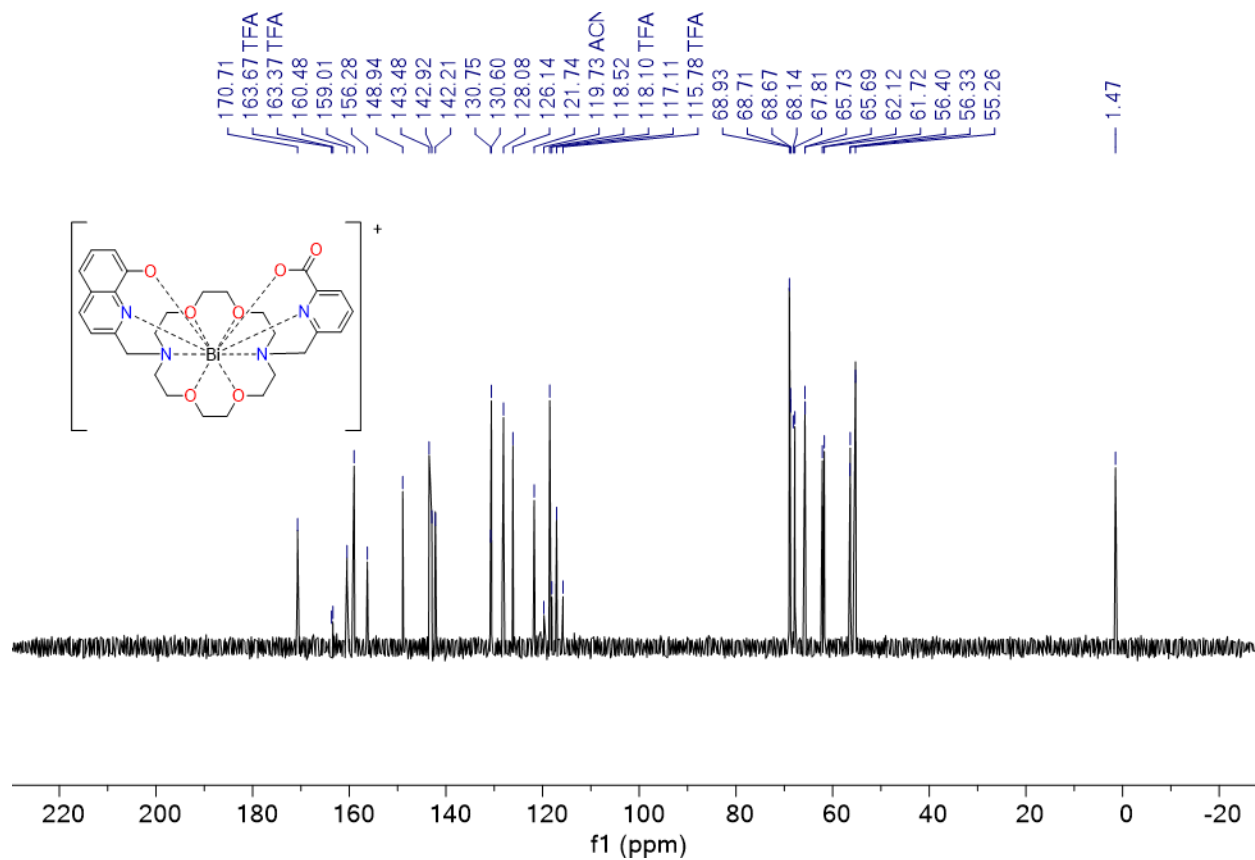

**Figure S38.**  $^{13}\text{C}\{^1\text{H}\}$  NMR spectrum of [Bi(macropaquin)]<sup>+</sup>. 126 MHz, 298 K, D<sub>2</sub>O.



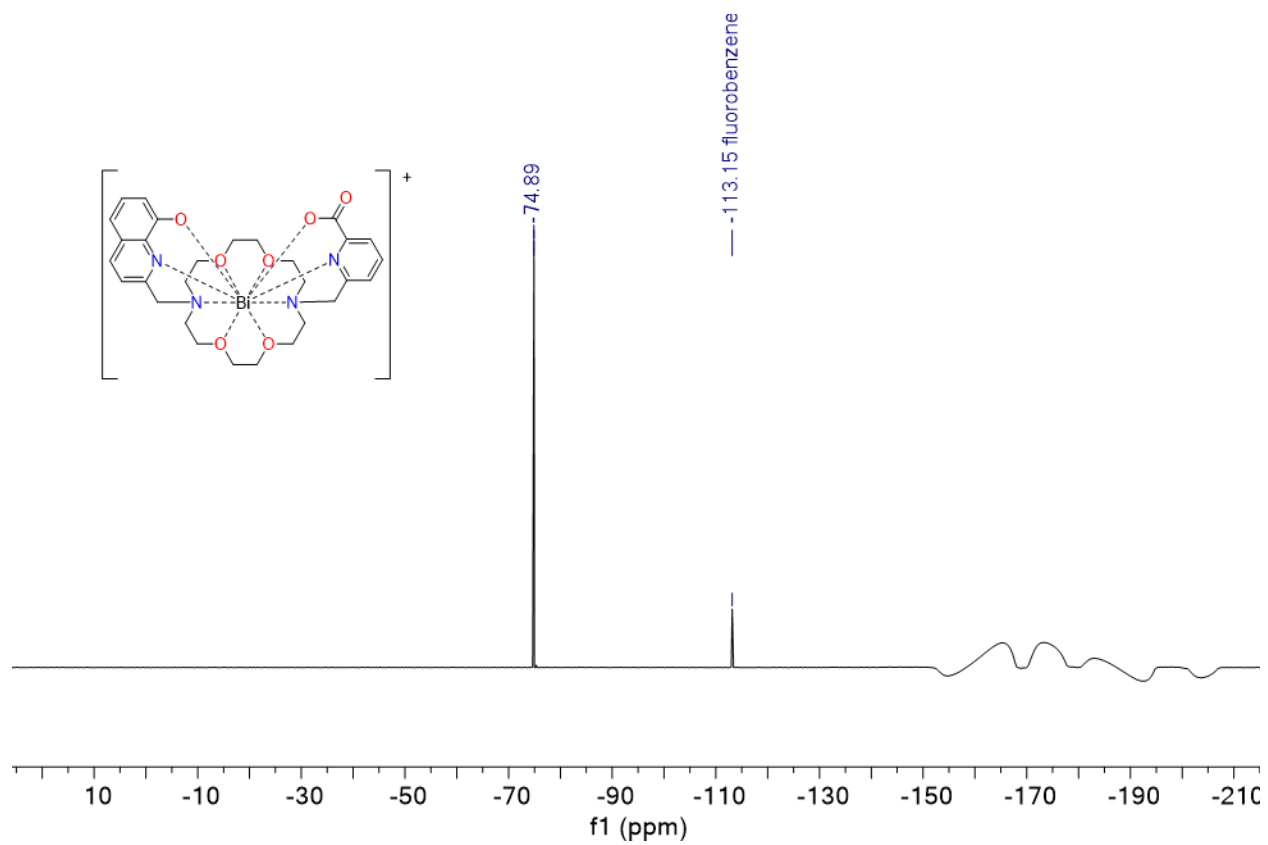

**Figure S39.**  $^{19}\text{F}$  NMR spectrum of  $[\text{Bi}(\text{macropaquin})]^+$ . 470 MHz, 298 K,  $\text{D}_2\text{O}$ .

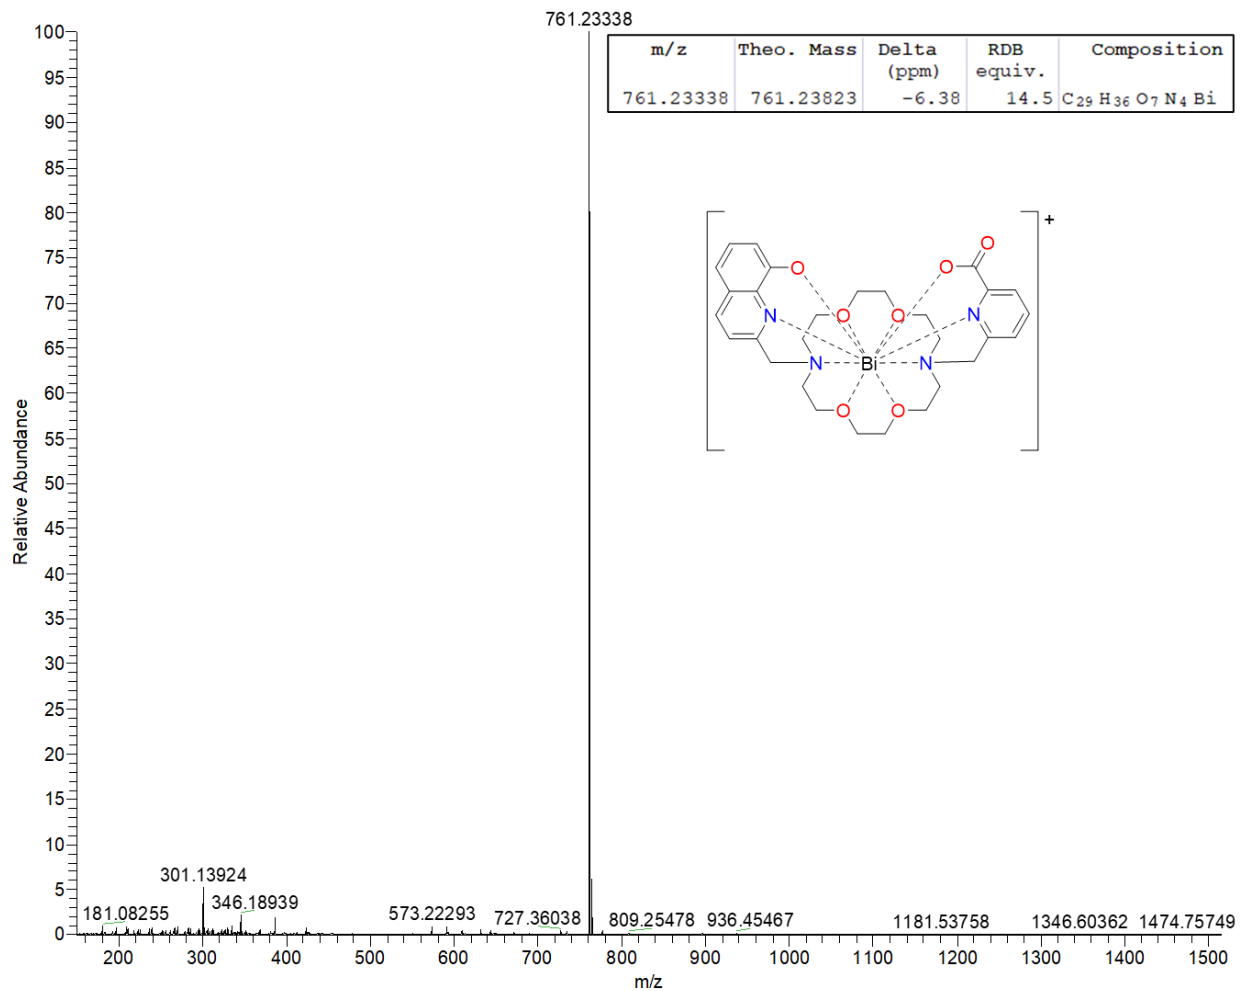

**Figure S40. ESI-HRMS of [Bi(macropaquin)]<sup>+</sup>.** The sample was diluted using a solution of CH<sub>3</sub>OH. The sample was analyzed using a mobile phase of CH<sub>3</sub>OH. One ion peak was observed, corresponding to [M]<sup>+</sup> (*m/z* 761.23338)

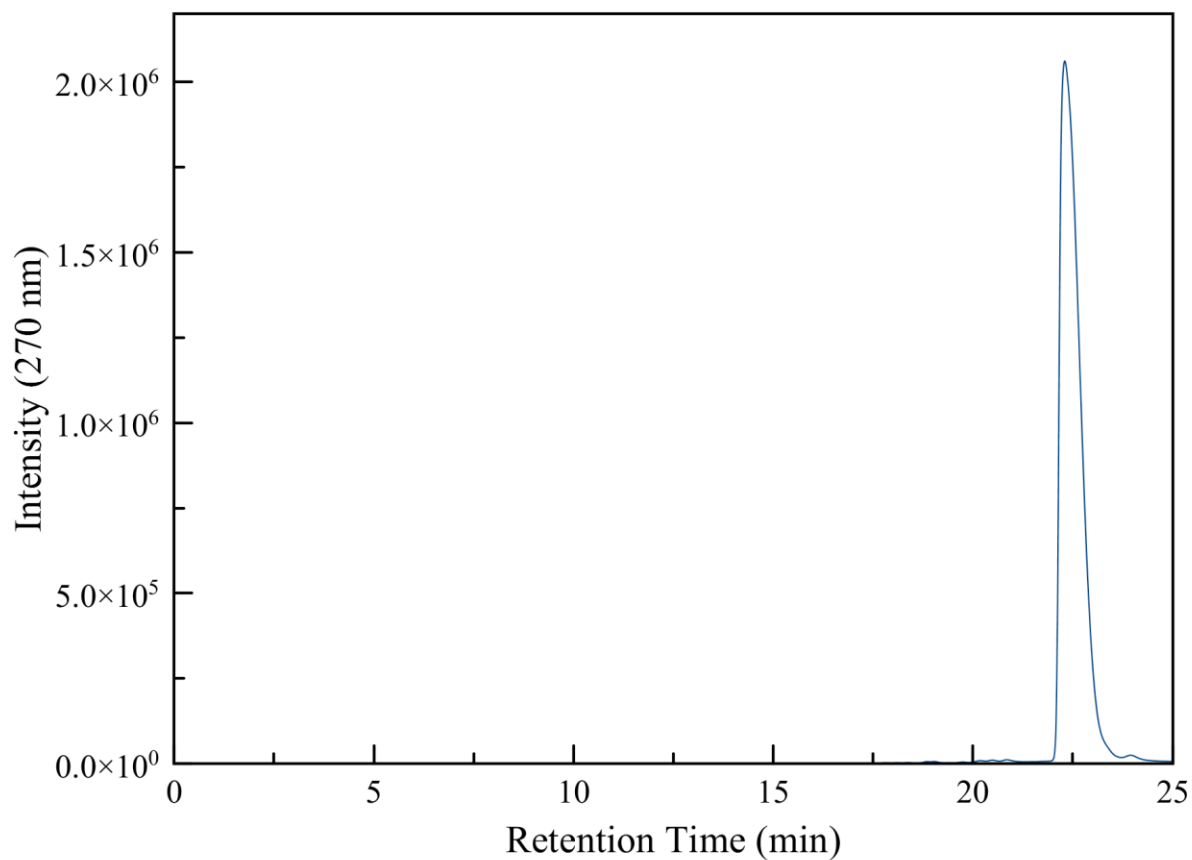

**Figure S41. HPLC chromatogram of [Bi(macropaquin)]<sup>+</sup>.** Retention time ( $t_R$ ) = 22.300 min using a binary MeOH/H<sub>2</sub>O mobile phase containing 0.1% TFA (program: 10% MeOH for 5 min, followed by a linear gradient to 100% MeOH over 20 min).

## 2.3 Crystallography

**Table S1.** X-ray Crystallographic Data Collection and Refinement Parameters for [Bi(macropa)](NO<sub>3</sub>)·dioxane [Bi(macrophospho)](TFA)·H<sub>2</sub>O, and [Bi(macrophosphi)](TFA)·H<sub>2</sub>O

| Compound                                                                   | [Bi(macropa)](NO <sub>3</sub> )·dioxane                          | [Bi(macrophospho)](TFA)·H <sub>2</sub> O                                                                   | [Bi(macrophosphi)](TFA)·H <sub>2</sub> O                                                       |
|----------------------------------------------------------------------------|------------------------------------------------------------------|------------------------------------------------------------------------------------------------------------|------------------------------------------------------------------------------------------------|
| Empirical formula                                                          | C <sub>28</sub> H <sub>38</sub> BiN <sub>5</sub> O <sub>12</sub> | C <sub>27.50</sub> H <sub>41.50</sub> BiF <sub>3</sub> N <sub>4.50</sub> O <sub>13.50</sub> P <sub>2</sub> | C <sub>28</sub> H <sub>42</sub> BiF <sub>3</sub> N <sub>4</sub> O <sub>11</sub> P <sub>2</sub> |
| Formula weight                                                             | 845.61                                                           | 979.07                                                                                                     | 938.57                                                                                         |
| <i>a</i> (Å)                                                               | 10.04970(10)                                                     | 17.76930(10)                                                                                               | 10.4640(2)                                                                                     |
| <i>b</i> (Å)                                                               | 12.3110(2)                                                       | 14.48670(10)                                                                                               | 12.0924(3)                                                                                     |
| <i>c</i> (Å)                                                               | 13.4780(2)                                                       | 27.9626(2)                                                                                                 | 13.8540(3)                                                                                     |
| <i>α</i> (°)                                                               | 70.3370(10)                                                      | 90                                                                                                         | 107.360(2)                                                                                     |
| <i>β</i> (°)                                                               | 72.1840(10)                                                      | 103.3710(10)                                                                                               | 91.025(2)                                                                                      |
| <i>γ</i> (°)                                                               | 76.3870(10)                                                      | 90                                                                                                         | 96.196(2)                                                                                      |
| <i>V</i> (Å <sup>3</sup> )                                                 | 1478.59(4)                                                       | 7002.97(8)                                                                                                 | 1661.07(7)                                                                                     |
| <i>Z</i>                                                                   | 2                                                                | 8                                                                                                          | 2                                                                                              |
| Crystal system                                                             | Triclinic                                                        | Monoclinic                                                                                                 | Triclinic                                                                                      |
| Space group                                                                | <i>P</i> $\bar{1}$                                               | <i>I</i> 12/a1                                                                                             | <i>P</i> $\bar{1}$                                                                             |
| $\rho_{\text{calc}}$ (mg/m <sup>3</sup> )                                  | 1.899                                                            | 1.857                                                                                                      | 1.877                                                                                          |
| $\mu$ (mm <sup>-1</sup> )                                                  | 12.357                                                           | 11.531                                                                                                     | 12.057                                                                                         |
| <i>T</i> (K)                                                               | 100.00(10)                                                       | 200.00(10)                                                                                                 | 99.9(3)                                                                                        |
| 2 $\theta$ range (°)                                                       | 3.595 to 70.076                                                  | 3.249 to 70.069                                                                                            | 3.347 to 70.060                                                                                |
| Independent reflections                                                    | 5603                                                             | 6645                                                                                                       | 6300                                                                                           |
| <i>R</i> <sub>int</sub>                                                    | 0.0612                                                           | 0.0690                                                                                                     | 0.0465                                                                                         |
| Number of parameters                                                       | 425                                                              | 454                                                                                                        | 479                                                                                            |
| Max, min peaks (e <sup>-</sup> ·Å <sup>-3</sup> )                          | 1.075/-0.862                                                     | 1.841/-0.705                                                                                               | 1.522/-1.110                                                                                   |
| <i>R</i> <sup>1</sup> / <i>wR</i> <sup>2</sup> <sup>b</sup> (all data)     | 0.0183/0.0442                                                    | 0.0348/0.0940                                                                                              | 0.02633/0.0645                                                                                 |
| <i>R</i> <sup>1</sup> / <i>wR</i> <sup>2</sup> <sup>b</sup> (>2 $\sigma$ ) | 0.0178/0.0439                                                    | 0.0337/0.0932                                                                                              | 0.0253/0.0638                                                                                  |
| Goodness of fit <sup>c</sup>                                               | 1.037                                                            | 1.054                                                                                                      | 1.063                                                                                          |

<sup>a</sup>  $R_1 = \sum ||F_o| - |F_c|| / \sum |F_o|$  for  $I > 2\sigma$ . <sup>b</sup>  $wR_2 = \{ \sum [w(F_o^2 - F_c^2)^2] / \sum [w(F_o^2)^2] \}^{1/2}$  for  $I > 2\sigma$ . <sup>c</sup>  $\text{GoF} = \{ \sum [w(F_o^2 - F_c^2)^2] / (n - p) \}^{1/2}$ , where  $n$  is the number of data and  $p$  is the number of refined parameters.

**Table S2.** SHAPE Output CSMs

| Complex                         | Johnson<br>Pentagonal<br>Pyramid | Trigonal<br>Prism | Octahedron | Pentagonal<br>Pyramid | Hexagon |
|---------------------------------|----------------------------------|-------------------|------------|-----------------------|---------|
| [Bi(macropa)] <sup>+</sup>      | 1.875                            | 18.735            | 30.965     | 3.038                 | 23.778  |
| [Bi(macrophospha)] <sup>+</sup> | 1.473                            | 18.688            | 30.933     | 2.532                 | 25.685  |
| [Bi(macrophosphi)] <sup>+</sup> | 1.388                            | 19.207            | 31.580     | 2.445                 | 25.591  |

## 2.4 DTPA Challenges

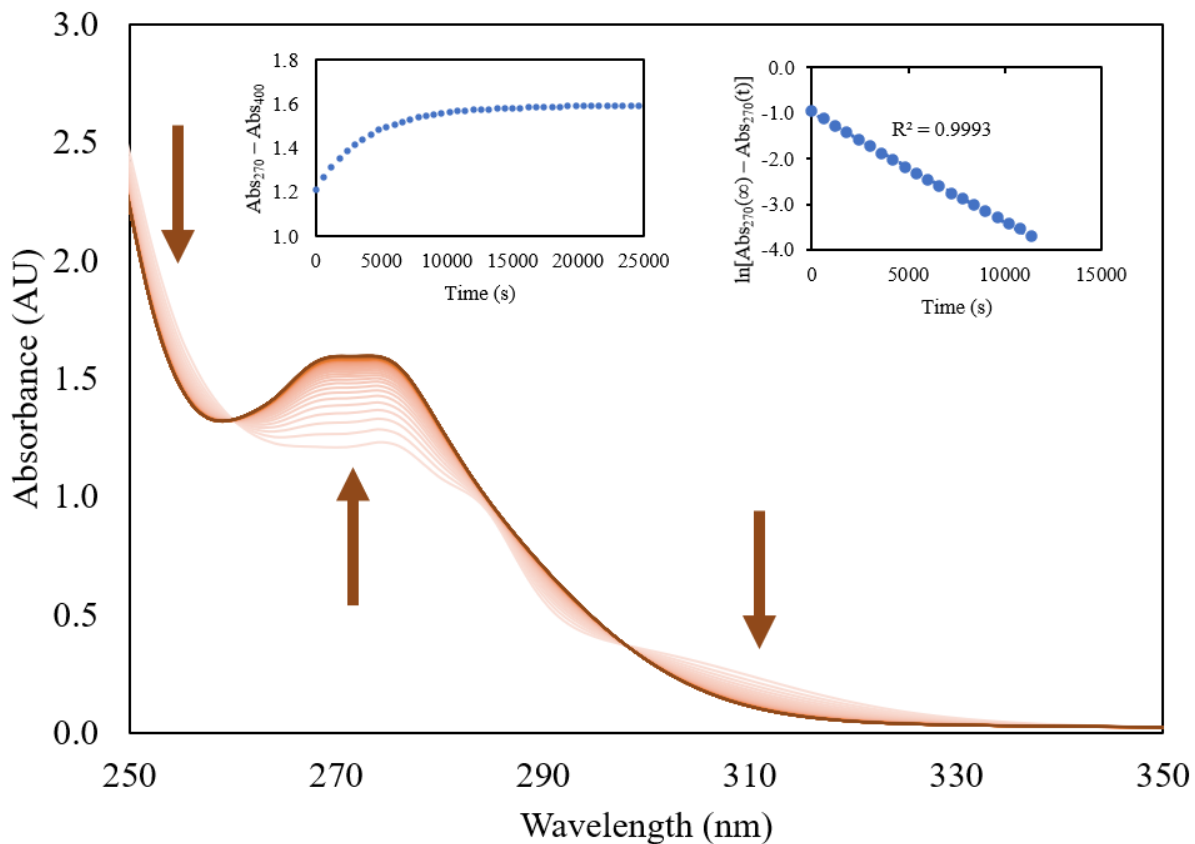

**Figure S42.  $[\text{Bi}(\text{macropa})]^+$  DTPA Challenge.** Two isobestic points are observed, demonstrating immediate transchelation. Insets show absorbance at 270 nm with a baseline normalization at 400 nm vs time (left) and the natural log of the difference between the final absorbance and the absorbance at each time (right).

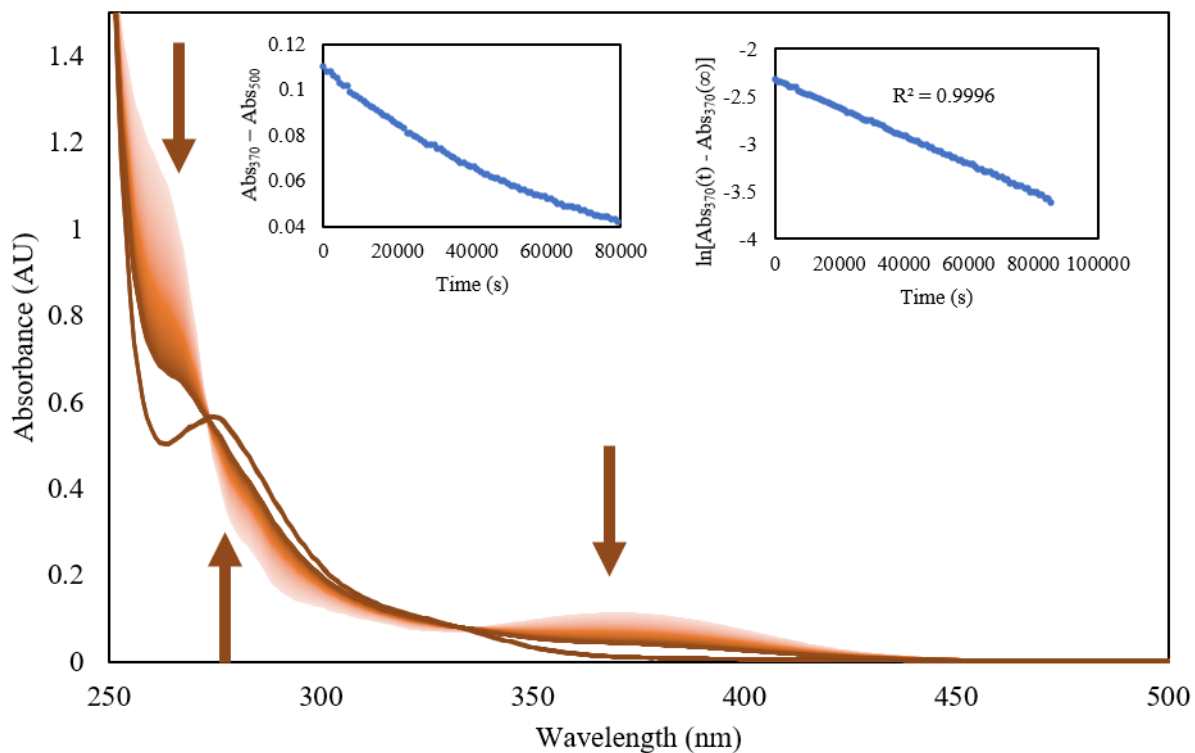

**Figure S43. [Bi(macropaquin)]<sup>+</sup> DTPA Challenge.** Spectra were measured regularly throughout the first 24 hours, while the final spectrum was taken 5 days after the start of the challenge. Spectral changes were confirmed to stop by this time point. Two isosbestic points are observed, demonstrating immediate transchelation. Insets show absorbance at 370 nm with a baseline normalization at 500 nm vs time (left) and the natural log of the difference between the final absorbance and the absorbance at each time (right).

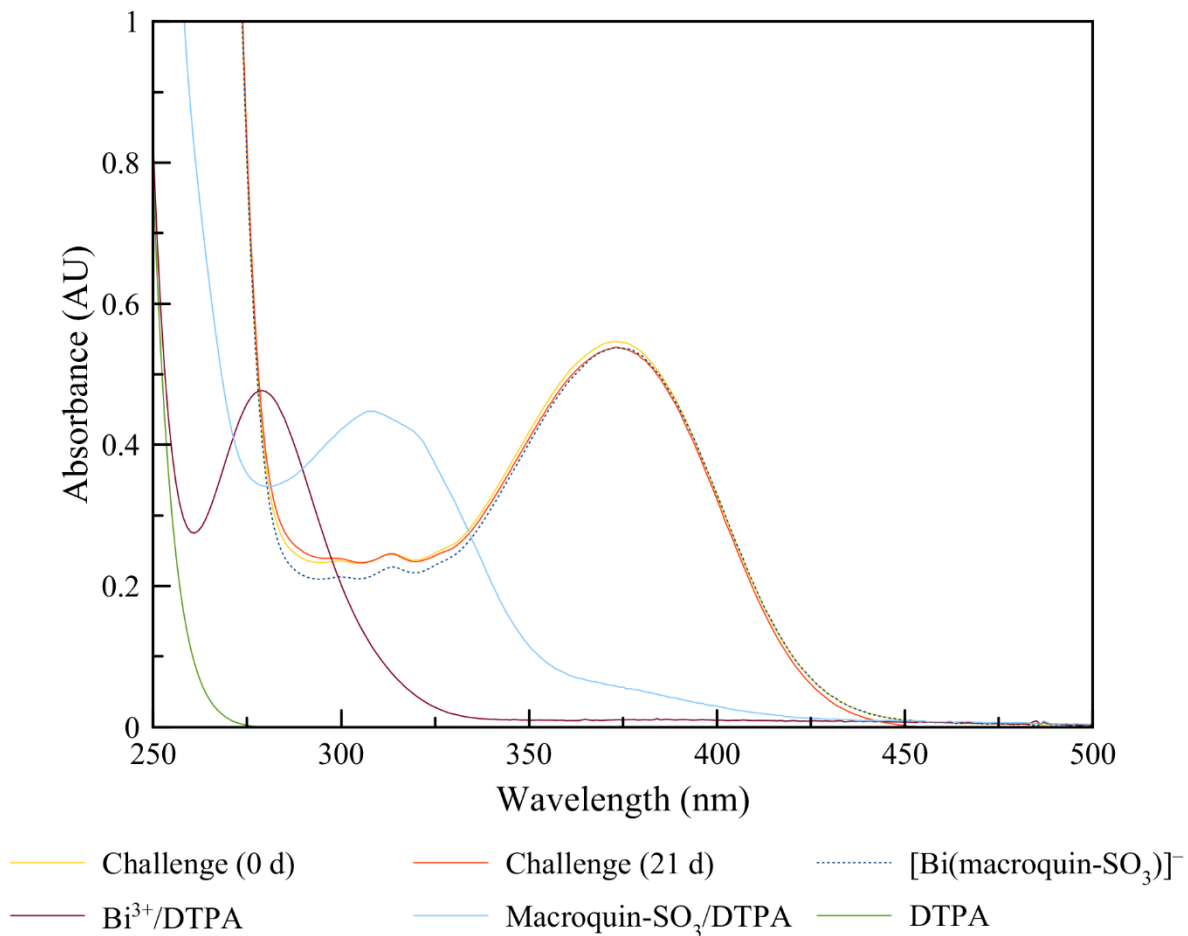

**Figure S44. [Bi(macroquin-SO<sub>3</sub>)]<sup>-</sup> DTPA Challenge.** No spectral changes were observed from 0 d (yellow) to 21 d (orange), demonstrating the kinetic inertness of the complex. The absorbance spectra of [Bi(macroquin-SO<sub>3</sub>)]<sup>-</sup> (dashed blue), free macroquin-SO<sub>3</sub> (light blue), free Bi<sup>3+</sup> (brown), and DTPA (green) are also shown to demonstrate that transchelation would result in spectral changes.



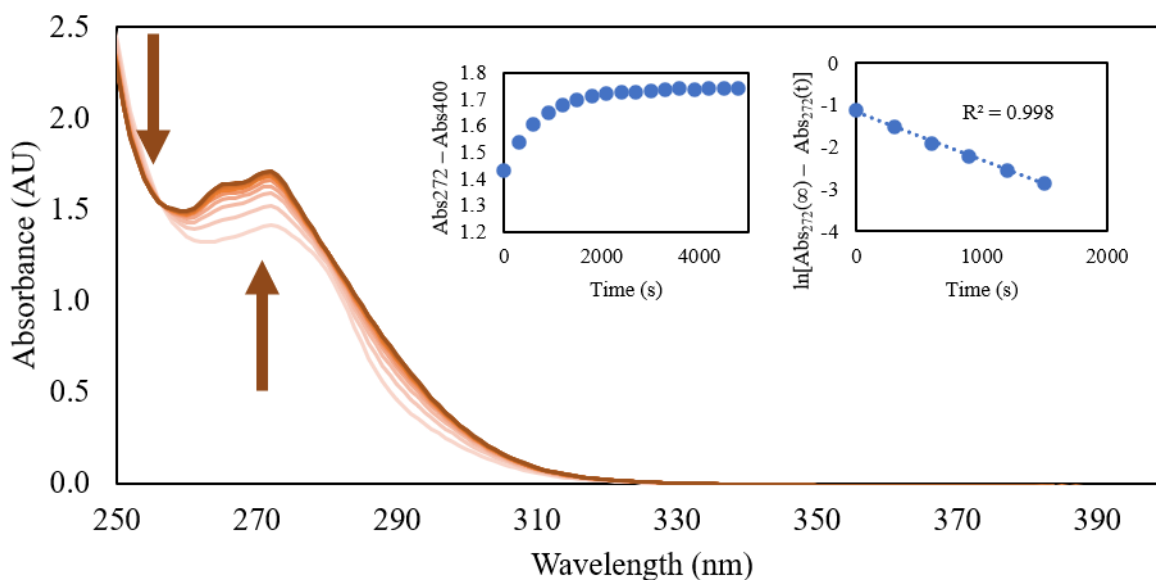

**Figure S45. [Bi(macrophospho)]<sup>+</sup> DTPA Challenge.** An isosbestic point is observed, demonstrating immediate transchelation. Insets show absorbance at 272 nm with a baseline normalization at 400 nm vs time (left) and the natural log of the difference between the final absorbance and the absorbance at each time (right).

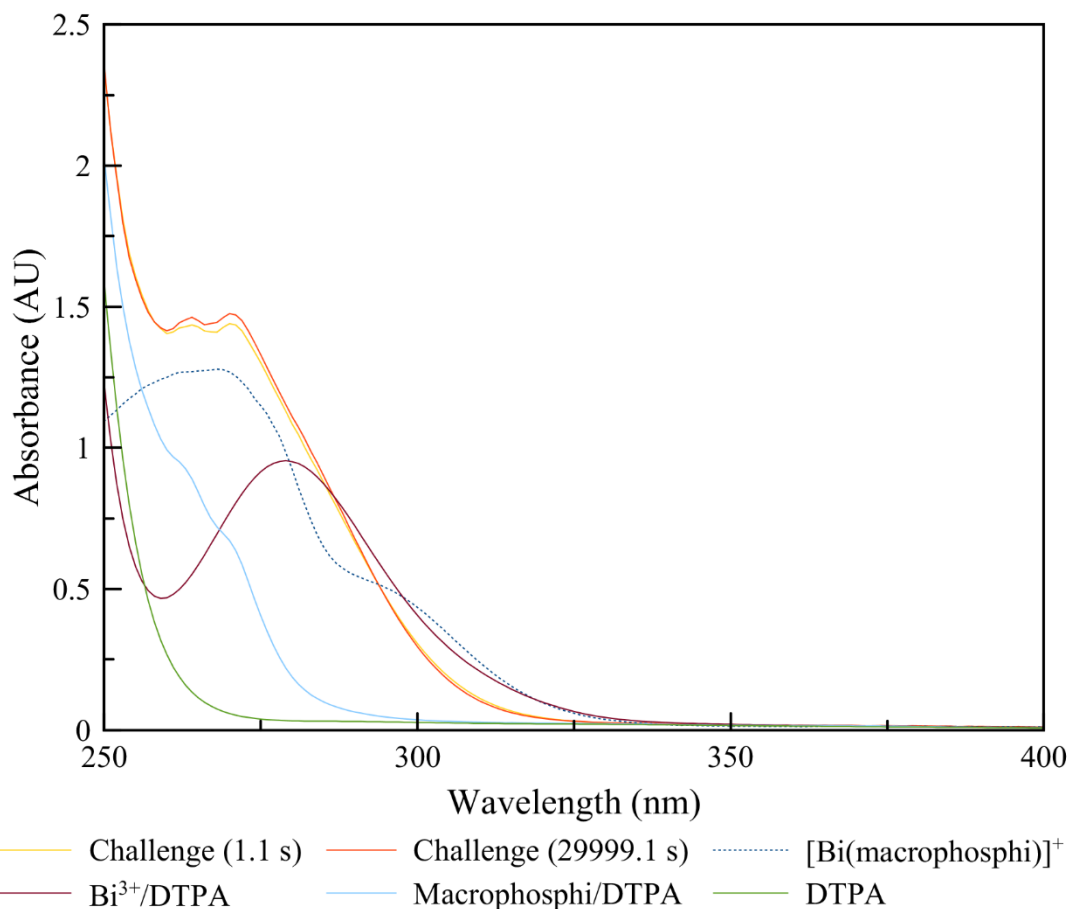

**Figure S46. [Bi(macrophosphi)]<sup>+</sup> DTPA Challenge.** No spectral changes were observed from 1.1 s (yellow) to 29999.1 s (orange), while the initial spectrum does not match that of [Bi(macrophosphi)]<sup>+</sup> (dashed blue). Instead, two observable peaks match the two shoulder peaks present in macrophosphi (light blue). This suggests nearly instantaneous transchelation of the complex. The absorbance spectra of DTPA (green) and free Bi<sup>3+</sup> (brown) are shown.

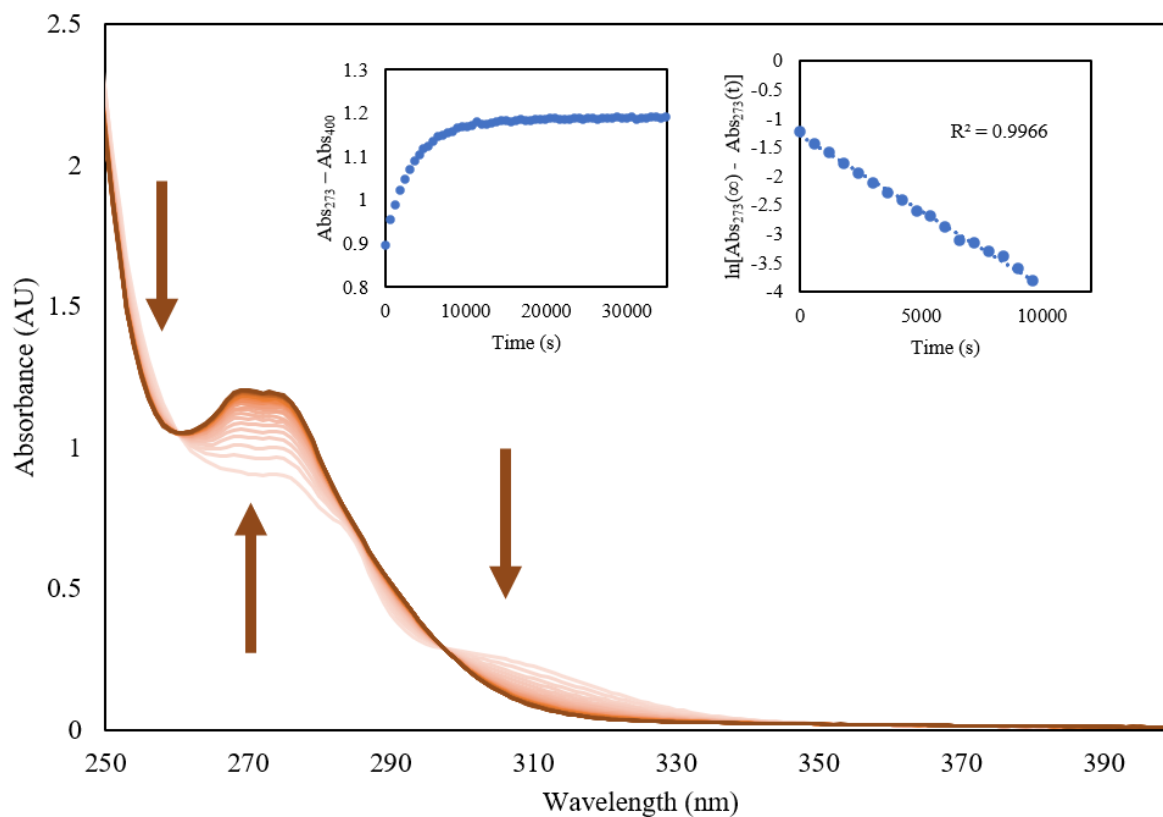

**Figure S47.  $[\text{Bi}(\text{CHX-macropa})]^+$  DTPA Challenge.** Two isosbestic points are observed, demonstrating immediate transchelation. Insets show absorbance at 273 nm with a baseline normalization at 400 nm vs time (left) and the natural log of the difference between the final absorbance and the absorbance at each time (right).

## 2.5. Computational Results

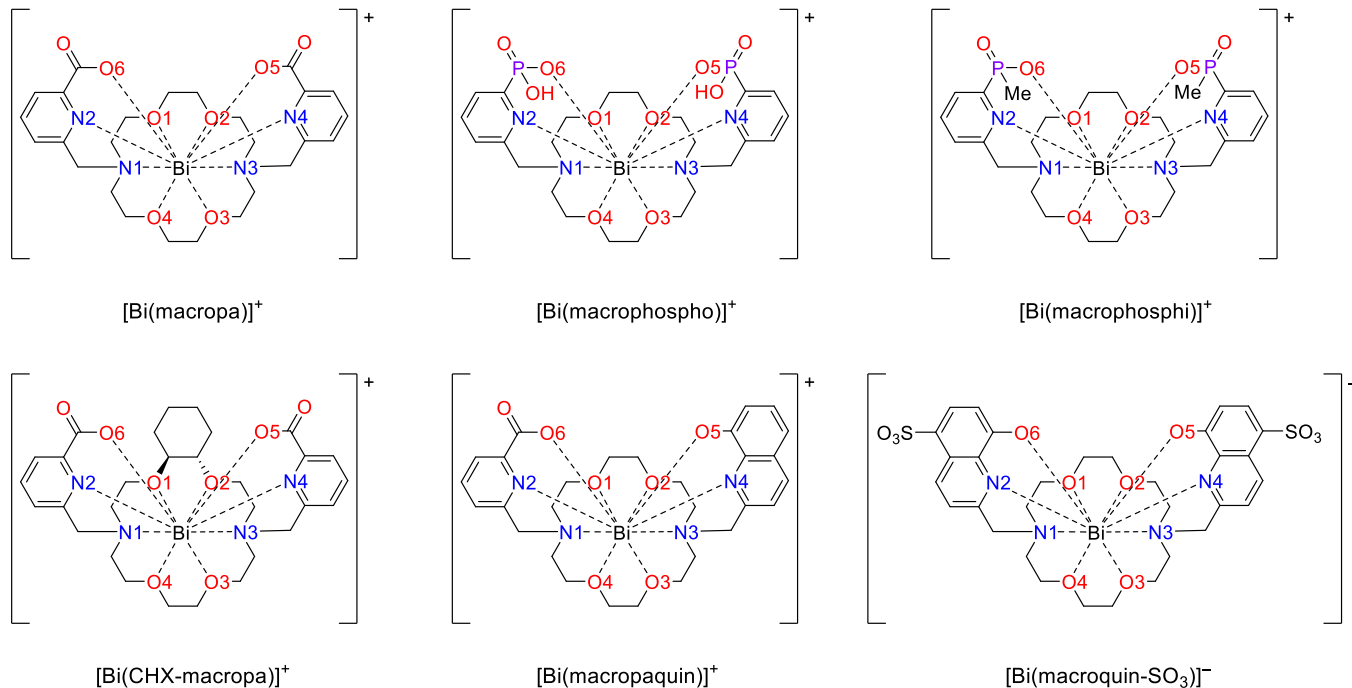

**Figure S48.** Atom numbering scheme for QTAIM calculations.

**Table S3.** Compiled QTAIM Results for [Bi(macrophosphi)]<sup>+</sup>. The Corresponding Units are  $\rho$  ( $e^- \text{ \AA}^{-3}$ ),  $\nabla^2\rho(\mathbf{r})$  (unitless),  $H(\mathbf{r})$  ( $\text{kJ/mol \AA}^{-3}$ ),  $V(\mathbf{r})$  ( $\text{kJ/mol \AA}^{-3}$ ),  $G(\mathbf{r})$  ( $\text{kJ/mol \AA}^{-3}$ ),  $H/\rho$  ( $\text{kJ/mol per } e^-$ ),  $|V|/G$  (unitless), and  $\delta$  (unitless)

| Contact            | $\rho(\mathbf{r})$ | $\nabla^2\rho(\mathbf{r})$ | $H(\mathbf{r})$ | $V(\mathbf{r})$ | $G(\mathbf{r})$ | $H/\rho$  | $ V /G$ | $\delta$ |
|--------------------|--------------------|----------------------------|-----------------|-----------------|-----------------|-----------|---------|----------|
| Bi–O1              | 0.0183             | 0.0627                     | 4.0894          | –32.9728        | 37.0622         | 223.7454  | 0.8897  | 0.3274   |
| Bi–O2              | 0.0151             | 0.0527                     | 4.7208          | –25.1468        | 29.8676         | 312.6905  | 0.8419  | 0.2917   |
| Bi–O3              | 0.0246             | 0.0862                     | 2.7700          | –51.0182        | 53.7882         | 312.6905  | 0.8419  | 0.4188   |
| Bi–O4 <sup>a</sup> | –                  | –                          | –               | –               | –               | –         | –       | 0.08694  |
| Bi–O5              | 0.0816             | 0.3159                     | –40.8693        | –288.9010       | 248.0318        | –500.7658 | 1.1648  | 0.9708   |
| Bi–O6              | 0.0790             | 0.3051                     | –38.0762        | –276.2232       | 238.1469        | –481.7647 | 1.1599  | 0.9476   |
| Bi–N1              | 0.0292             | 0.0691                     | –3.6798         | –52.7400        | 49.0602         | –125.8641 | 1.0750  | 0.4697   |
| Bi–N2              | 0.0507             | 0.1247                     | –17.7810        | –117.3759       | 99.5949         | –350.5292 | 1.1785  | 0.6846   |
| Bi–N3              | 0.0155             | 0.0384                     | 1.7174          | –21.7582        | 23.4756         | 110.5529  | 0.9268  | 0.3032   |
| Bi–N4              | 0.0416             | 0.1021                     | –10.8898        | –88.7619        | 77.8721         | –261.7623 | 1.1398  | 0.6054   |

*a.* A bond critical point could not be located between these atoms

**Table S4.** Compiled QTAIM Results for [Bi(macrophospha)]<sup>+</sup>. The Corresponding Units are  $\rho$  ( $e^- \text{ \AA}^{-3}$ ),  $\nabla^2\rho(\mathbf{r})$  (unitless),  $H(\mathbf{r})$  ( $\text{kJ/mol \AA}^{-3}$ ),  $V(\mathbf{r})$  ( $\text{kJ/mol \AA}^{-3}$ ),  $G(\mathbf{r})$  ( $\text{kJ/mol \AA}^{-3}$ ),  $H/\rho$  ( $\text{kJ/mol per } e^-$ ),  $|V|/G$  (unitless), and  $\delta$  (unitless)

| Contact | $\rho(\mathbf{r})$ | $\nabla^2\rho(\mathbf{r})$ | $H(\mathbf{r})$ | $V(\mathbf{r})$ | $G(\mathbf{r})$ | $H/\rho$ | $ V /G$ | $\delta$ |
|---------|--------------------|----------------------------|-----------------|-----------------|-----------------|----------|---------|----------|
| Bi–O1   | 0.0063             | 0.0210                     | 3.2236          | –7.3687         | 10.5927         | 514.9444 | 0.6956  | 0.1311   |

|       |        |        |          |           |          |           |        |        |
|-------|--------|--------|----------|-----------|----------|-----------|--------|--------|
| Bi-O2 | 0.0257 | 0.0895 | 2.3668   | -54.0253  | 56.3921  | 92.1067   | 0.9580 | 0.4347 |
| Bi-O3 | 0.0147 | 0.0509 | 4.7168   | -23.9546  | 28.6714  | 92.1067   | 0.9580 | 0.2862 |
| Bi-O4 | 0.0158 | 0.0539 | 4.3781   | -26.6463  | 31.0243  | 277.8497  | 0.8589 | 0.2950 |
| Bi-O5 | 0.0881 | 0.3526 | -47.5688 | -326.3038 | 278.7350 | -540.2123 | 1.1707 | 0.9977 |
| Bi-O6 | 0.0718 | 0.2697 | -31.1072 | -239.1356 | 208.0284 | -432.9824 | 1.1495 | 0.8771 |
| Bi-N1 | 0.0306 | 0.0723 | -4.5233  | -56.4754  | 51.9522  | -147.6179 | 1.0871 | 0.4830 |
| Bi-N2 | 0.0476 | 0.1179 | -15.3202 | -107.9704 | 92.6502  | -321.6876 | 1.1654 | 0.6499 |
| Bi-N3 | 0.0175 | 0.2484 | 1.2139   | -25.7839  | 26.9977  | 69.2168   | 0.9550 | 0.3332 |
| Bi-N4 | 0.0444 | 0.1093 | -12.9238 | -97.5587  | 84.6349  | -291.0008 | 1.1527 | 0.6323 |

**Table S5.** Compiled QTAIM Results for [Bi(CHX-macropa)]<sup>+</sup>. The Corresponding Units are  $\rho$  ( $e^- \text{ \AA}^{-3}$ ),  $\nabla^2\rho(\mathbf{r})$  (unitless),  $H(\mathbf{r})$  ( $\text{kJ/mol \AA}^{-3}$ ),  $V(\mathbf{r})$  ( $\text{kJ/mol \AA}^{-3}$ ),  $G(\mathbf{r})$  ( $\text{kJ/mol \AA}^{-3}$ ),  $H/\rho$  ( $\text{kJ/mol per } e^-$ ),  $|V|/G$  (unitless), and  $\delta$  (unitless)

| Contact | $\rho(\mathbf{r})$ | $\nabla^2\rho(\mathbf{r})$ | $H(\mathbf{r})$ | $V(\mathbf{r})$ | $G(\mathbf{r})$ | $H/\rho$  | $ V /G$ | $\delta$ |
|---------|--------------------|----------------------------|-----------------|-----------------|-----------------|-----------|---------|----------|
| Bi-O1   | 0.0514             | 0.1292                     | -18.2421        | -121.2608       | 103.0187        | -354.8838 | 1.1771  | 0.6843   |
| Bi-O2   | 0.0571             | 0.1443                     | -23.1416        | -140.9230       | 117.7814        | -405.3109 | 1.1965  | 0.7247   |
| Bi-O3   | 0.0213             | 0.0458                     | -0.7270         | -31.4916        | 30.7646         | -405.3109 | 1.1965  | 0.3525   |
| Bi-O4   | 0.0178             | 0.0550                     | 3.1312          | -29.8604        | 32.9916         | 175.4914  | 0.9051  | 0.2999   |
| Bi-O5   | 0.0776             | 0.2831                     | -38.6701        | -262.9884       | 224.3183        | -498.0826 | 1.1724  | 0.9523   |
| Bi-O6   | 0.0786             | 0.2880                     | -39.4743        | -267.8234       | 228.3491        | -502.2058 | 1.1729  | 0.9626   |
| Bi-N1   | 0.0082             | 0.0255                     | 3.3099          | -10.1021        | 13.4120         | 404.5845  | 0.7532  | 0.3567   |
| Bi-N2   | 0.0155             | 0.0481                     | 3.6336          | -24.2898        | 27.9234         | 234.3138  | 0.8699  | 0.2722   |
| Bi-N3   | 0.0218             | 0.0675                     | 2.2519          | -39.7922        | 42.0441         | 103.1472  | 0.9464  | 0.1575   |
| Bi-N4   | 0.0322             | 0.0664                     | -6.6396         | -56.8372        | 50.1976         | -206.1312 | 1.1323  | 0.4715   |

**Table S6.** Compiled QTAIM Results for [Bi(macropa)]<sup>+</sup>. The Corresponding Units are  $\rho$  ( $e^- \text{ \AA}^{-3}$ ),  $\nabla^2\rho(\mathbf{r})$  (unitless),  $H(\mathbf{r})$  ( $\text{kJ/mol \AA}^{-3}$ ),  $V(\mathbf{r})$  ( $\text{kJ/mol \AA}^{-3}$ ),  $G(\mathbf{r})$  ( $\text{kJ/mol \AA}^{-3}$ ),  $H/\rho$  ( $\text{kJ/mol per } e^-$ ),  $|V|/G$  (unitless), and  $\delta$  (unitless)

| Contact | $\rho(\mathbf{r})$ | $\nabla^2\rho(\mathbf{r})$ | $H(\mathbf{r})$ | $V(\mathbf{r})$ | $G(\mathbf{r})$ | $H/\rho$  | $ V /G$ | $\delta$ |
|---------|--------------------|----------------------------|-----------------|-----------------|-----------------|-----------|---------|----------|
| Bi-O1   | 0.0155             | 0.0535                     | 4.5642          | -25.9728        | 30.5370         | 294.0775  | 0.8505  | 0.2954   |
| Bi-O2   | 0.0182             | 0.0618                     | 3.9990          | -32.5688        | 36.5678         | 219.9833  | 0.8906  | 0.3273   |
| Bi-O3   | 0.0070             | 0.0236                     | 3.4896          | -8.4898         | 11.9793         | 219.9833  | 0.8906  | 0.1517   |
| Bi-O4   | 0.0206             | 0.0711                     | 3.7230          | -39.2123        | 42.9353         | 180.6130  | 0.9133  | 0.3681   |
| Bi-O5   | 0.0792             | 0.2911                     | -40.1190        | -271.1319       | 231.0129        | -506.3900 | 1.1737  | 0.9690   |
| Bi-O6   | 0.0778             | 0.2837                     | -38.7577        | -263.5928       | 224.8352        | -498.4372 | 1.1724  | 0.9526   |
| Bi-N1   | 0.0265             | 0.0636                     | -2.3712         | -46.5008        | 44.1297         | -89.4222  | 1.0537  | 0.4341   |
| Bi-N2   | 0.0566             | 0.1424                     | -22.7328        | -138.9202       | 116.1874        | -401.4145 | 1.1957  | 0.7238   |
| Bi-N3   | 0.0178             | 0.0440                     | 1.1498          | -26.6088        | 27.7586         | 64.6022   | 0.9586  | 0.3299   |
| Bi-N4   | 0.0512             | 0.1285                     | -18.0922        | -120.5117       | 102.4195        | -353.3262 | 1.1766  | 0.6839   |

**Table S7.** Compiled QTAIM Results for [Bi(macropaquin)]<sup>+</sup>. The Corresponding Units are  $\rho$  ( $e^- \text{ \AA}^{-3}$ ),  $\nabla^2\rho(\mathbf{r})$  (unitless),  $H(\mathbf{r})$  ( $\text{kJ/mol \AA}^{-3}$ ),  $V(\mathbf{r})$  ( $\text{kJ/mol \AA}^{-3}$ ),  $G(\mathbf{r})$  ( $\text{kJ/mol \AA}^{-3}$ ),  $H/\rho$  ( $\text{kJ/mol per } e^-$ ),  $|V|/G$  (unitless), and  $\delta$  (unitless).

| Contact | $\rho(\mathbf{r})$ | $\nabla^2\rho(\mathbf{r})$ | $H(\mathbf{r})$ | $V(\mathbf{r})$ | $G(\mathbf{r})$ | $H/\rho$ | $ V /G$ | $\delta$ |
|---------|--------------------|----------------------------|-----------------|-----------------|-----------------|----------|---------|----------|
|---------|--------------------|----------------------------|-----------------|-----------------|-----------------|----------|---------|----------|

|       |        |        |          |           |          |           |        |        |
|-------|--------|--------|----------|-----------|----------|-----------|--------|--------|
| Bi-O1 | 0.0488 | 0.1223 | -16.1913 | -112.6188 | 96.4275  | -331.545  | 1.1679 | 0.6674 |
| Bi-O2 | 0.0600 | 0.1527 | -25.6462 | -151.4920 | 125.8458 | -427.1610 | 1.2038 | 0.7523 |
| Bi-O3 | 0.0158 | 0.0394 | 1.6805   | -22.5243  | 24.2047  | -427.1610 | 1.2038 | 0.3010 |
| Bi-O4 | 0.0182 | 0.0620 | 4.0156   | -32.6334  | 36.6489  | 220.2951  | 0.8904 | 0.3309 |
| Bi-O5 | 0.0797 | 0.2863 | -41.7686 | -271.3049 | 229.5363 | -524.1951 | 1.1820 | 0.9831 |
| Bi-O6 | 0.0790 | 0.2905 | -39.7312 | -269.9509 | 230.2197 | -503.1691 | 1.1726 | 0.9715 |
| Bi-N1 | 0.0191 | 0.0015 | 4.0513   | -35.3382  | 39.3896  | 211.7137  | 0.8971 | 0.3493 |
| Bi-N2 | 0.0152 | 0.0522 | 4.5830   | -25.1098  | 29.6928  | 301.8964  | 0.8457 | 0.2916 |
| Bi-N3 | 0.0055 | 0.0181 | 2.8872   | -6.0987   | 8.9859   | 529.7280  | 0.6787 | 0.1189 |
| Bi-N4 | 0.0263 | 0.0631 | -2.2831  | -45.9558  | 43.6727  | -86.6741  | 1.0523 | 0.4341 |

**Table S8.** Compiled QTAIM Results for Bi[(macroquin-SO<sub>3</sub>)]<sup>-</sup>. The Corresponding Units are  $\rho$  ( $e^- \text{ \AA}^{-3}$ ),  $\nabla^2\rho(\mathbf{r})$  (unitless),  $H(\mathbf{r})$  ( $\text{kJ/mol \AA}^{-3}$ ),  $V(\mathbf{r})$  ( $\text{kJ/mol \AA}^{-3}$ ),  $G(\mathbf{r})$  ( $\text{kJ/mol \AA}^{-3}$ ),  $H/\rho$  ( $\text{kJ/mol per } e^-$ ),  $|V|/G$  (unitless), and  $\delta$  (unitless)

| Contact | $\rho(\mathbf{r})$ | $\nabla^2\rho(\mathbf{r})$ | $H(\mathbf{r})$ | $V(\mathbf{r})$ | $G(\mathbf{r})$ | $H/\rho$  | $ V /G$ | $\delta$ |
|---------|--------------------|----------------------------|-----------------|-----------------|-----------------|-----------|---------|----------|
| Bi-O1   | 0.0069             | 0.0237                     | 3.6309          | -8.3062         | 11.9372         | 523.5501  | 0.6958  | 0.1571   |
| Bi-O2   | 0.0127             | 0.0434                     | 4.5507          | -19.3726        | 23.9234         | 358.8095  | 0.8098  | 0.2533   |
| Bi-O3   | 0.0069             | 0.0237                     | 3.6316          | -8.3095         | 11.9411         | 358.8095  | 0.8098  | 0.1571   |
| Bi-O4   | 0.0127             | 0.0434                     | 4.5510          | -19.3822        | 23.9332         | 358.7002  | 0.8098  | 0.2533   |
| Bi-O5   | 0.0872             | 0.3066                     | -50.5010        | -302.0060       | 251.5050        | -579.2698 | 1.2008  | 1.0345   |
| Bi-O6   | 0.0872             | 0.3066                     | -50.4962        | -301.9797       | 251.4835        | -579.2422 | 1.2008  | 1.0345   |
| Bi-N1   | 0.0152             | 0.0321                     | 1.9153          | -17.2402        | 19.1555         | 126.2895  | 0.9000  | 0.2921   |
| Bi-N2   | 0.0581             | 0.1387                     | -23.6980        | -138.3841       | 114.6862        | -407.7068 | 1.2066  | 0.7213   |
| Bi-N3   | 0.0152             | 0.0321                     | 1.9156          | -17.2384        | 19.1541         | 126.3215  | 0.9000  | 0.2921   |
| Bi-N4   | 0.0581             | 0.1387                     | -23.6958        | -138.3744       | 114.6786        | -407.6882 | 1.2066  | 0.7213   |

## 2.6 iTLCs

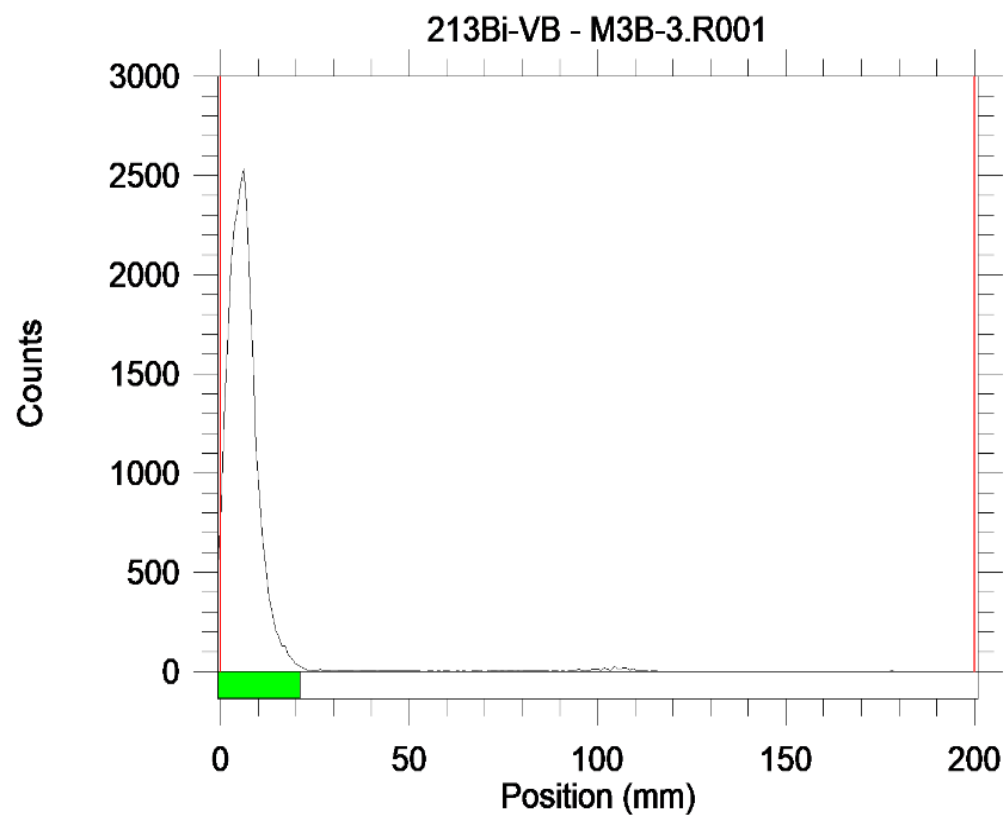

Figure S49. iTLC of macropa at  $10^{-4}$  M, showing >99% RCY.

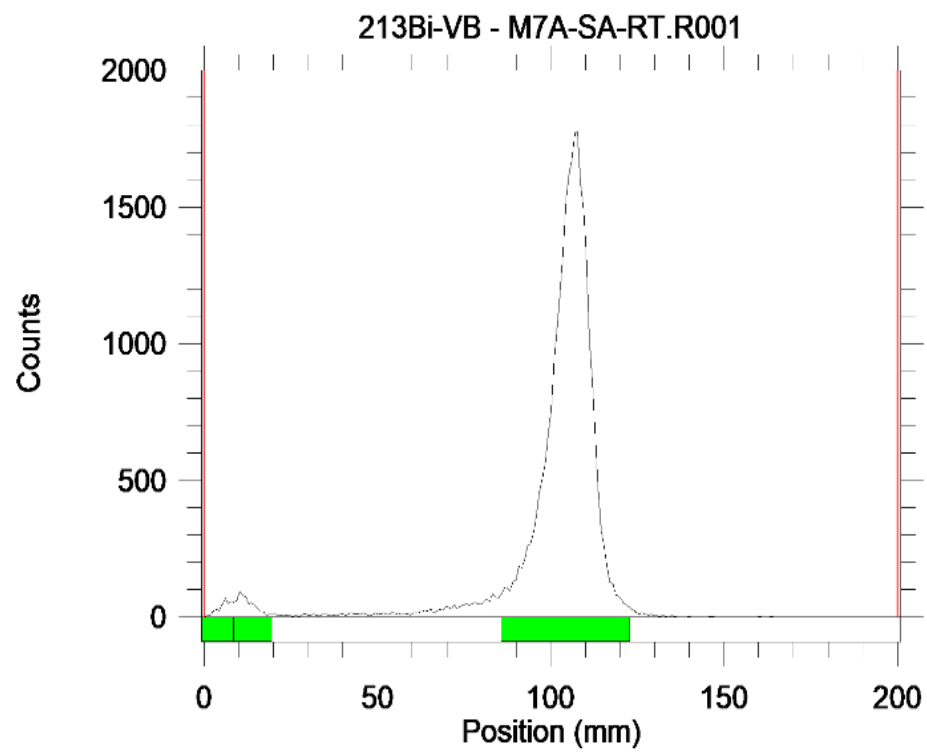

Figure S50. iTLC of macropa at  $10^{-8}$  M, showing 3.21% RCY.



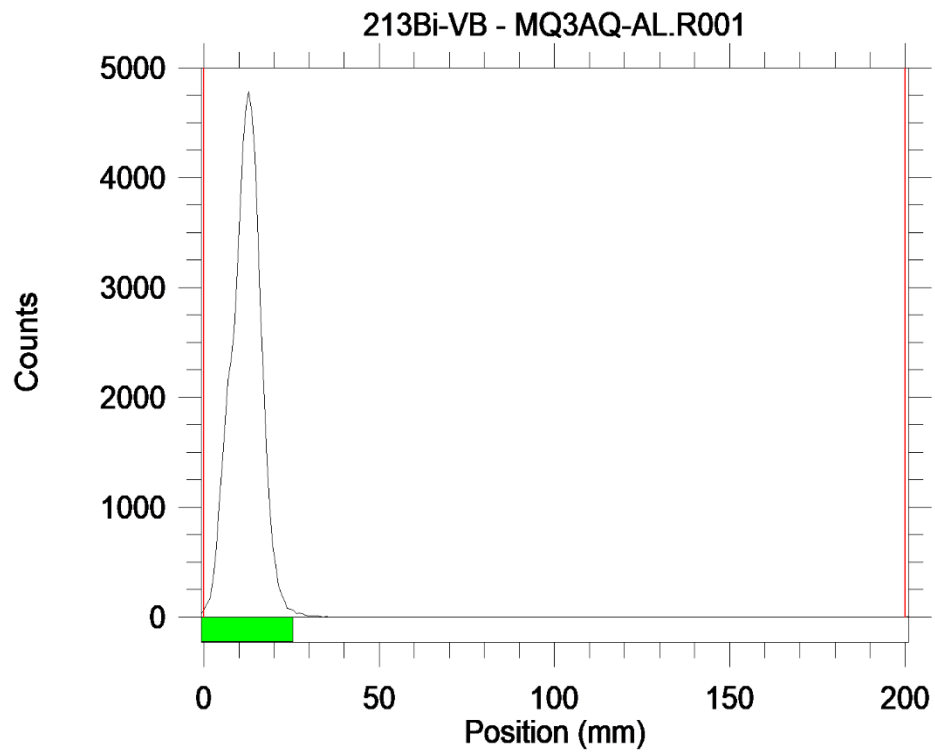

**Figure S51. iTLC of macropaquin at  $10^{-4}$  M, showing >99% RCY.**

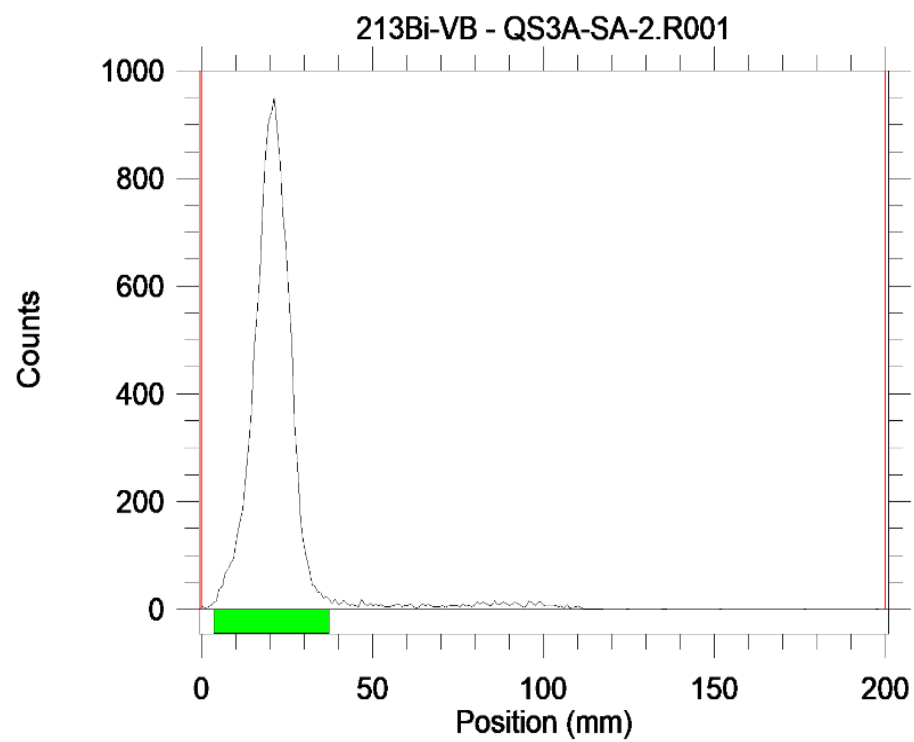

**Figure S52. iTLC of macroquin-SO<sub>3</sub> at 10<sup>-4</sup> M, showing >99% RCY.**

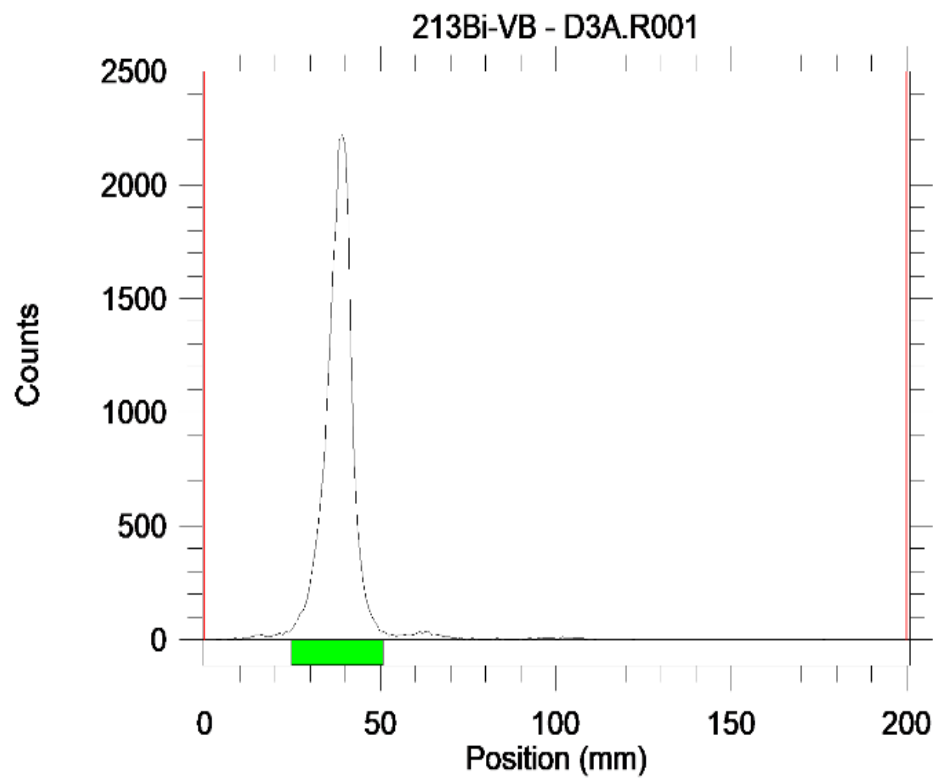

Figure S53. iTLC of DOTA at  $10^{-4}$  M, showing >99% RCY.

### 3. REFERENCES

- (1) Mato-Iglesias, M.; Roca-Sabio, A.; Pálinkás, Z.; Esteban-Gómez, D.; Platas-Iglesias, C.; Tóth, É.; de Blas, A.; Rodríguez-Blas, T. Lanthanide Complexes Based on a 1,7-Diaza-12-Crown-4 Platform Containing Picolinate Pendants: A New Structural Entry for the Design of Magnetic Resonance Imaging Contrast Agents. *Inorg. Chem.* **2008**, *47*, 7840–7851.
- (2) Roca-Sabio, A.; Mato-Iglesias, M.; Esteban-Gómez, D.; Tóth, É.; De Bias, A.; Platas-Iglesias, C.; Rodríguez-Blas, T. Macrocyclic Receptor Exhibiting Unprecedented Selectivity for Light Lanthanides. *J. Am. Chem. Soc.* **2009**, *131*, 3331–3341.
- (3) Thiele, N. A.; Fiszbein, D. J.; Woods, J. J.; Wilson, J. J. Tuning the Separation of Light Lanthanides Using a Reverse-Size Selective Aqueous Complexant. *Inorg. Chem.* **2020**, *59*, 16522–16530.
- (4) Thiele, N. A.; MacMillan, S. N.; Wilson, J. J. Rapid Dissolution of BaSO<sub>4</sub> by Macropa, an 18-Membered Macrocyclic with High Affinity for Ba<sup>2+</sup>. *J. Am. Chem. Soc.* **2018**, *140*, 17071–17078.
- (5) Thiele, N. A.; Woods, J. J.; Wilson, J. J. Implementing F-Block Metal Ions in Medicine: Tuning the Size Selectivity of Expanded Macrocycles. *Inorg. Chem.* **2019**, *58*, 10483–10500.
- (6) Polášek, M.; Šedinová, M.; Kotek, J.; Vander Elst, L.; Muller, R. N.; Hermann, P.; Lukeš, I. Pyridine-*N*-Oxide Analogues of DOTA and Their Gadolinium(III) Complexes Endowed with a Fast Water Exchange on the Square-Antiprismatic Isomer. *Inorg. Chem.* **2009**, *48*, 455–465.
- (7) Salaam, J.; Tabti, L.; Bahamyirou, S.; Lecointre, A.; Hernandez Alba, O.; Jeannin, O.;

- Camerel, F.; Cianféroni, S.; Bentouhami, E.; Nonat, A. M.; Charbonnière, L. J. Formation of Mono- and Polynuclear Luminescent Lanthanide Complexes Based on the Coordination of Preorganized Phosphonated Pyridines. *Inorg. Chem.* **2018**, *57*, 6095–6106.
- (8) Lima, L. M. P.; Beyler, M.; Oukhatar, F.; Le Saec, P.; Faivre-Chauvet, A.; Platas-Iglesias, C.; Delgado, R.; Tripier, R. H<sub>2</sub>Me-Do2pa: An Attractive Chelator with Fast, Stable and Inert <sup>Nat</sup>Bi<sup>3+</sup> and <sup>213</sup>Bi<sup>3+</sup> Complexation for Potential  $\alpha$ -Radioimmunotherapy Applications. *Chem. Commun.* **2014**, *50*, 12371–12374.
- (9) CrysAlisPro. Rigaku OD: The Woodlands, TX 2015.
- (10) Sheldrick, G. M. SHELXT - Integrated Space-Group and Crystal-Structure Determination. *Acta Crystallogr., Sect. A: Found. Adv.* **2015**, *71*, 3–8.
- (11) Sheldrick, G. M. A Short History of SHELX. *Acta Crystallogr., Sect. A: Found. Crystallogr.* **2008**, *64*, 112–122.
- (12) Müller, P. Practical Suggestions for Better Crystal Structures. *Crystallogr. Rev.* **2009**, *15*, 57–83.
- (13) Dolomanov, O. V.; Bourhis, L. J.; Gildea, R. J.; Howard, J. A. K.; Puschmann, H. OLEX2: A Complete Structure Solution, Refinement and Analysis Program. *J. Appl. Crystallogr.* **2009**, *42*, 339–341.
- (14) Gans, P.; O'Sullivan, B. GLEE, a New Computer Program for Glass Electrode Calibration. *Talanta* **2000**, *51*, 33–37.
- (15) Sweeton, F. H.; Mesmer, R. E.; Baes, C. F. Acidity Measurements at Elevated Temperatures. VII. Dissociation of Water. *J. Solution Chem.* **1974**, *3*, 191–214.
- (16) Gans, P.; Sabatini, A.; Vacca, A. Investigation of Equilibria in Solution. Determination of

- Equilibrium Constants with the HYPERQUAD Suite of Programs. *Talanta* **1996**, *43*, 1739–1753.
- (17) Frisch, M. J.; Trucks, G. W.; Schlegel, H. B.; Scuseria, G. E.; Robb, M. A.; Cheeseman, J. R.; Scalmani, G.; Barone, V.; Petersson, G. A.; Nakatsuji, H.; Li, X.; Caricato, M.; Marenich, A. V.; Bloino, J.; Janesko, B. G.; Gomperts, R.; Mennucci, B.; Hratchian, H. P.; Ortiz, J. V.; Izmaylov, A. F.; Sonnenberg, J. L.; Williams-Young, D.; Ding, F.; Lipparini, F.; Egidi, F.; Goings, J.; Peng, B.; Petrone, A.; Henderson, T.; Ranasinghe, D.; Zakrzewski, V. G.; Gao, J.; Rega, N.; Zheng, G.; Liang, W.; Hada, M.; Ehara, M.; Toyota, K.; Fukuda, R.; Hasegawa, J.; Ishida, M.; Nakajima, T.; Honda, Y.; Kitao, O.; Nakai, H.; Vreven, T.; Throssell, K.; Montgomery, J. A., Jr.; Peralta, J. E.; Ogliaro, F.; Bearpark, M. J.; Heyd, J. J.; Brothers, E. N.; Kudin, K. N.; Staroverov, V. N.; Keith, T. A.; Kobayashi, R.; Normand, J.; Raghavachari, K.; Rendell, A. P.; Burant, J. C.; Iyengar, S. S.; Tomasi, J.; Cossi, M.; Millam, J. M.; Klene, M.; Adamo, C.; Cammi, R.; Ochterski, J. W.; Martin, R. L.; Morokuma, K.; Farkas, O.; Foresman, J. B.; Fox, D. J. Gaussian 16, Revision C.01. Gaussian, Inc., Wallingford CT, 2016.
- (18) Tao, J.; Perdew, J. P.; Staroverov, V. N.; Scuseria, G. E. Climbing the Density Functional Ladder: Nonempirical Meta-Generalized Gradient Approximation Designed for Molecules and Solids. *Phys. Rev. Lett.* **2003**, *91*, 146401.
- (19) Schäfer, A.; Huber, C.; Ahlrichs, R. Fully Optimized Contracted Gaussian Basis Sets of Triple Zeta Valence Quality for Atoms Li to Kr. *J. Chem. Phys.* **1994**, *100*, 5829–5835.
- (20) Metz, B.; Stoll, H.; Dolg, M. Small-Core Multiconfiguration-Dirac-Hartree-Fock-Adjusted Pseudopotentials for Post-d Main Group Elements: Application to PbH and PbO. *J. Chem. Phys.* **2000**, *113*, 2563–2569.

- (21) Glendening, E. D.; Badenhop, J. K.; Reed, A. D.; Carpenter, J. E.; Weinhold, F. NBO Version 3.1. TCI; University of Wisconsin, Madison, WI 1998.
- (22) Lu, T.; Chen, F. Multiwfn: A Multifunctional Wavefunction Analyzer. *J. Comput. Chem.* **2012**, *33*, 580–592.
- (23) Ma, D.; McDevitt, M. R.; Finn, R. D.; Scheinberg, D. A. Breakthrough of  $^{225}\text{Ac}$  and Its Radionuclide Daughters from an  $^{225}\text{Ac}/^{213}\text{Bi}$  Generator: Development of New Methods, Quantitative Characterization, and Implications for Clinical Use. *Appl. Radiat. Isot.* **2001**, *55*, 667–678.
- (24) McDevitt, M. R.; Finn, R. D.; Sgouros, G.; Ma, D.; Scheinberg, D. A. An  $^{225}\text{Ac}/^{213}\text{Bi}$  Generator System for Therapeutic Clinical Applications : Construction and Operation. *Appl. Radiat. Isot.* **1999**, *50*, 895–904.
- (25) Robertson, A. K. H.; McNeil, B. L.; Yang, H.; Gendron, D.; Perron, R.; Radchenko, V.; Zeisler, S.; Causey, P.; Schaffer, P.  $^{232}\text{Th}$ -Spallation-Produced  $^{225}\text{Ac}$  with Reduced  $^{227}\text{Ac}$  Content. *Inorg. Chem.* **2020**, *59*, 12156–12165.
